# Supplementary material for: Comprehensive assessment on the association of dietary vitamins with all-cause and cardiovascular mortality among individuals with prediabetes: evidence from NHANES 1999–2018
Source: Royal Society of Chemistry journal article supplement (doi:10.1039/d4fo02893g), 2024-01-01
Supplement: d4fo02893g1.pdf [file d4fo02893g1.pdf]

**Supplementary Figure 1** The flowchart of participants inclusion and exclusion

**Supplementary Figure 2** Distribution density of vitamin levels within the mortality of the prediabetic population

**Supplementary Figure 3** Kaplan-Meier analysis of the survival probability among the Q1-Q4 quartiles of vitamin levels

**Supplementary Table 1** Baseline levels of laboratory characteristics in participants with prediabetes according to the vitamin level quartiles

**Supplementary Table 2 (1-11)** Subgroup analysis of hazard ratios for vitamin levels with all-cause and CVD mortality in participants with prediabetes from NHANES 1999-2018

**Supplementary Table 3** Sensitivity analysis of hazard ratios for vitamin levels with all-cause and CVD mortality in prediabetes after excluding participants who experienced an outcome event within the first three years of follow-up

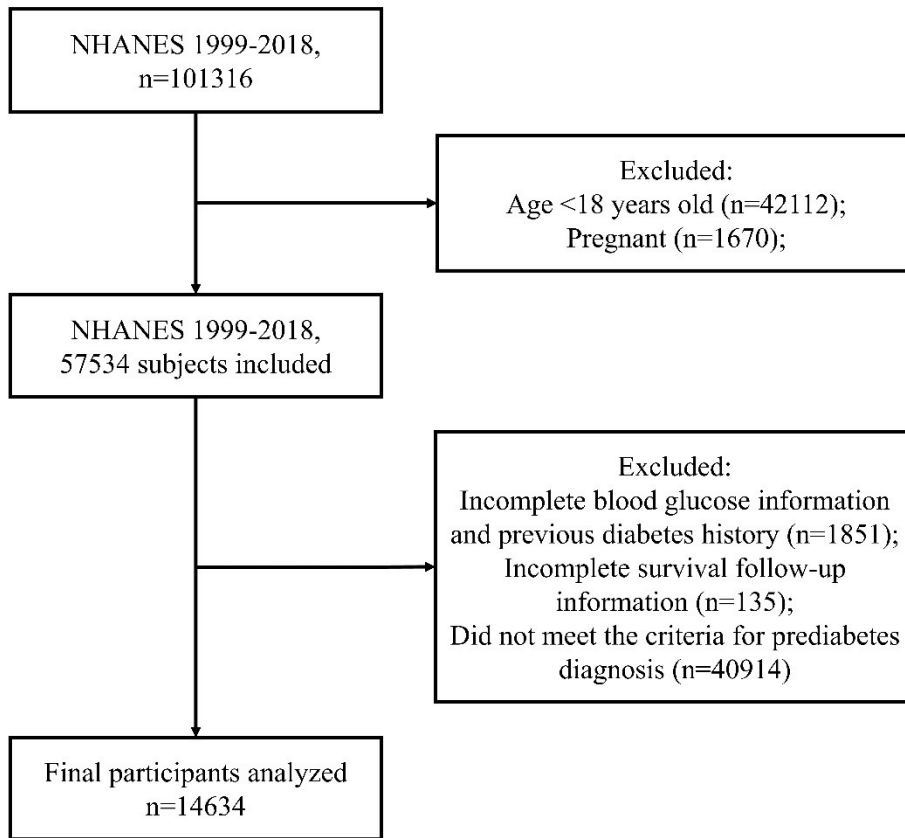

**Supplementary Figure 1** The flowchart of participants inclusion and exclusion

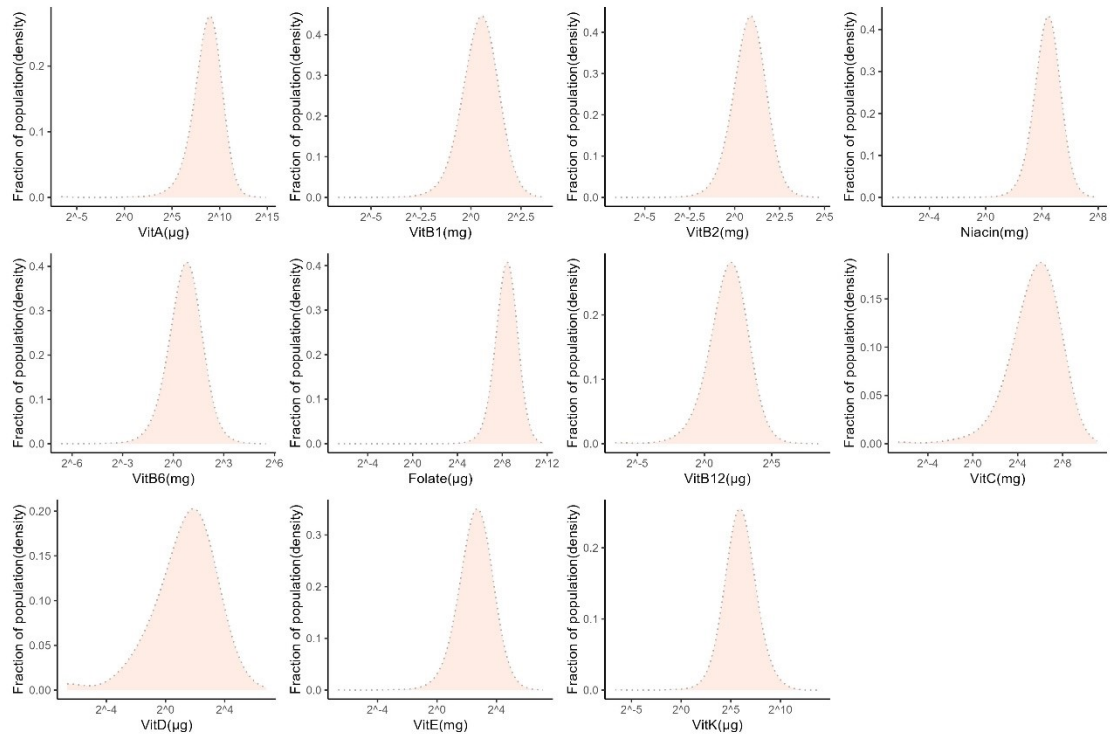

**Supplementary Figure 2** Distribution density of vitamin levels within the mortality of the prediabetic population

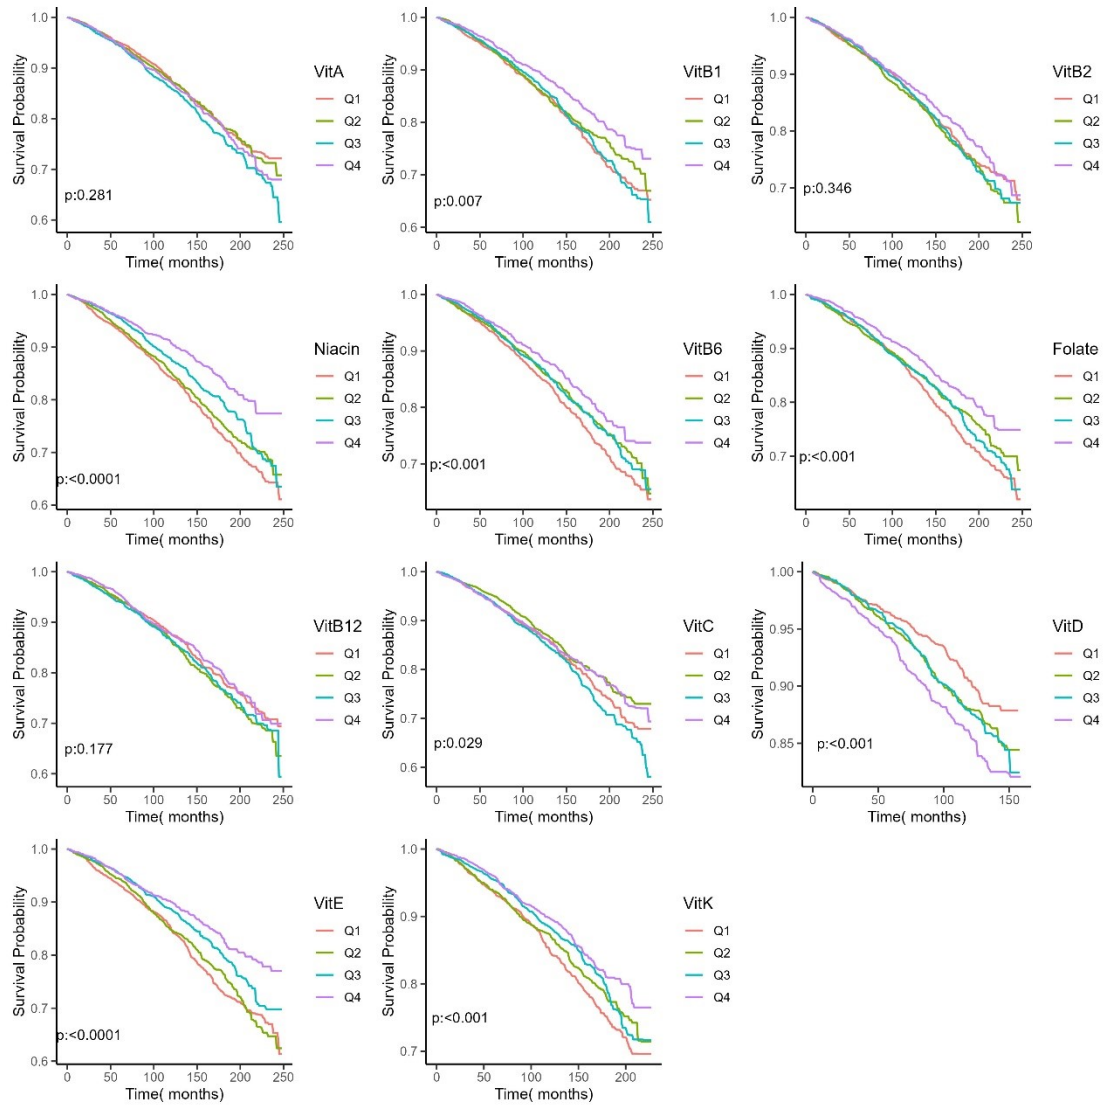

**Supplementary Figure 3** Kaplan-Meier analysis of the survival probability among the Q1-Q4 quartiles of vitamin levels

**Supplementary Table 1** Baseline levels of laboratory characteristics in participants with prediabetes according to the vitamin level quartiles

| Variable                     | Quartiles of vitamin levels |                 |                 |                 | P value  |
|------------------------------|-----------------------------|-----------------|-----------------|-----------------|----------|
|                              | Q1                          | Q2              | Q3              | Q4              |          |
| <b>Vitamin A</b>             |                             |                 |                 |                 |          |
| FBG (mmol/L)                 | 5.77(5.61,6.11)             | 5.83(5.61,6.11) | 5.83(5.61,6.11) | 5.79(5.61,6.05) | 0.64     |
| 2-h PG (mmol/L)              | 6.61(5.27,8.10)             | 6.66(5.38,8.22) | 6.55(5.33,8.05) | 6.55(5.38,8.10) | 0.92     |
| HbA <sub>1c</sub> (mmol/mol) | 5.70(5.40,5.90)             | 5.70(5.40,5.80) | 5.70(5.40,5.90) | 5.70(5.40,5.90) | 0.18     |
| <b>Vitamin B1</b>            |                             |                 |                 |                 |          |
| FBG (mmol/L)                 | 5.77(5.61,6.10)             | 5.78(5.61,6.11) | 5.83(5.61,6.11) | 5.81(5.61,6.11) | 0.62     |
| 2-h PG (mmol/L)              | 6.77(5.50,8.22)             | 6.61(5.38,7.99) | 6.72(5.38,8.27) | 6.38(5.16,7.94) | 0.01     |
| HbA <sub>1c</sub> (mmol/mol) | 5.70(5.40,5.90)             | 5.70(5.40,5.90) | 5.70(5.40,5.90) | 5.70(5.40,5.80) | 0.02     |
| <b>Vitamin B2</b>            |                             |                 |                 |                 |          |
| FBG (mmol/L)                 | 5.77(5.55,6.05)             | 5.82(5.61,6.06) | 5.83(5.61,6.11) | 5.83(5.61,6.11) | 0.005    |
| 2-h PG (mmol/L)              | 6.88(5.61,8.27)             | 6.72(5.44,8.05) | 6.61(5.38,8.16) | 6.38(5.05,7.94) | 0.002    |
| HbA <sub>1c</sub> (mmol/mol) | 5.70(5.40,5.90)             | 5.70(5.40,5.90) | 5.70(5.40,5.90) | 5.70(5.40,5.80) | < 0.001  |
| <b>Niacin</b>                |                             |                 |                 |                 |          |
| FBG (mmol/L)                 | 5.77(5.55,6.05)             | 5.83(5.61,6.06) | 5.82(5.61,6.11) | 5.83(5.61,6.11) | < 0.001  |
| 2-h PG (mmol/L)              | 6.88(5.66,8.38)             | 6.72(5.38,8.22) | 6.61(5.44,8.10) | 6.33(5.05,7.88) | < 0.001  |
| HbA <sub>1c</sub> (mmol/mol) | 5.70(5.50,5.90)             | 5.70(5.40,5.90) | 5.70(5.40,5.90) | 5.70(5.40,5.80) | < 0.0001 |
| <b>Vitamin B6</b>            |                             |                 |                 |                 |          |
| FBG (mmol/L)                 | 5.77(5.61,6.09)             | 5.77(5.61,6.05) | 5.83(5.61,6.11) | 5.83(5.61,6.11) | 0.05     |
| 2-h PG (mmol/L)              | 6.83(5.55,8.22)             | 6.55(5.38,8.10) | 6.61(5.44,8.16) | 6.44(5.05,7.99) | 0.01     |
| HbA <sub>1c</sub> (mmol/mol) | 5.70(5.50,5.90)             | 5.70(5.40,5.90) | 5.70(5.40,5.90) | 5.70(5.40,5.80) | < 0.0001 |
| <b>Folate</b>                |                             |                 |                 |                 |          |
| FBG (mmol/L)                 | 5.77(5.61,6.11)             | 5.82(5.61,6.05) | 5.83(5.61,6.11) | 5.79(5.61,6.05) | 0.63     |
| 2-h PG (mmol/L)              | 6.77(5.50,8.22)             | 6.61(5.38,8.05) | 6.61(5.33,8.10) | 6.44(5.22,8.05) | 0.26     |
| HbA <sub>1c</sub> (mmol/mol) | 5.70(5.40,5.90)             | 5.70(5.40,5.90) | 5.70(5.40,5.90) | 5.70(5.40,5.80) | 0.02     |
| <b>Vitamin B12</b>           |                             |                 |                 |                 |          |
| FBG (mmol/L)                 | 5.77(5.55,6.05)             | 5.77(5.61,6.05) | 5.83(5.61,6.11) | 5.83(5.61,6.11) | 0.01     |
| 2-h PG (mmol/L)              | 6.77(5.50,8.27)             | 6.61(5.33,8.05) | 6.66(5.44,8.16) | 6.33(5.11,7.99) | 0.01     |
| HbA <sub>1c</sub> (mmol/mol) | 5.70(5.50,5.90)             | 5.70(5.40,5.90) | 5.70(5.40,5.90) | 5.70(5.40,5.80) | 0.002    |
| <b>Vitamin C</b>             |                             |                 |                 |                 |          |
| FBG (mmol/L)                 | 5.77(5.61,6.10)             | 5.82(5.61,6.11) | 5.83(5.61,6.11) | 5.82(5.61,6.05) | 0.96     |
| 2-h PG (mmol/L)              | 6.61(5.33,7.99)             | 6.61(5.44,8.22) | 6.66(5.50,8.22) | 6.55(5.16,8.16) | 0.39     |
| HbA <sub>1c</sub> (mmol/mol) | 5.70(5.40,5.90)             | 5.70(5.40,5.90) | 5.70(5.40,5.90) | 5.70(5.40,5.90) | 0.12     |
| <b>Vitamin D</b>             |                             |                 |                 |                 |          |
| FBG (mmol/L)                 | 5.77(5.61,6.11)             | 5.83(5.61,6.05) | 5.83(5.55,6.05) | 5.82(5.61,6.11) | 0.91     |
| 2-h PG (mmol/L)              | 6.49(5.27,8.10)             | 6.66(5.38,8.16) | 6.66(5.44,8.10) | 6.44(5.16,7.88) | 0.36     |
| HbA <sub>1c</sub> (mmol/mol) | 5.70(5.40,5.90)             | 5.70(5.50,5.90) | 5.70(5.40,5.90) | 5.70(5.50,5.90) | 0.16     |
| <b>Vitamin E</b>             |                             |                 |                 |                 |          |
| FBG (mmol/L)                 | 5.77(5.55,6.05)             | 5.83(5.61,6.11) | 5.83(5.61,6.05) | 5.83(5.61,6.05) | 0.03     |
| 2-h PG (mmol/L)              | 6.72(5.44,8.33)             | 6.72(5.44,8.16) | 6.55(5.33,7.94) | 6.44(5.22,8.10) | 0.1      |
| HbA <sub>1c</sub> (mmol/mol) | 5.70(5.40,5.90)             | 5.70(5.40,5.90) | 5.70(5.40,5.90) | 5.70(5.40,5.80) | < 0.001  |

---

**Vitamin K**

|                              |                 |                 |                 |                 |       |
|------------------------------|-----------------|-----------------|-----------------|-----------------|-------|
| FBG (mmol/L)                 | 5.77(5.55,6.06) | 5.80(5.61,6.11) | 5.83(5.61,6.11) | 5.83(5.61,6.11) | 0.03  |
| 2-h PG (mmol/L)              | 6.83(5.55,8.33) | 6.66(5.44,8.05) | 6.50(5.16,7.99) | 6.44(5.33,8.10) | 0.004 |
| HbA <sub>1c</sub> (mmol/mol) | 5.70(5.40,5.90) | 5.70(5.40,5.90) | 5.70(5.40,5.90) | 5.70(5.40,5.90) | 0.47  |

---

Data are presented as HR (95% CI) unless otherwise indicated. FPG: Fasting plasma glucose; 2-h PG: 2-hour post-load plasma glucose; HbA<sub>1c</sub>: Hemoglobin A1c

**Supplementary Table 2.1** Subgroup analysis of hazard ratios for vitamin A levels with all-cause and CVD mortality in participants with prediabetes from NHANES 1999-2018

|                                     | Q1 | Q2                   | Q3                   | Q4                   | <i>P</i> <sub>trend</sub> | <i>P</i> <sub>interaction</sub> |
|-------------------------------------|----|----------------------|----------------------|----------------------|---------------------------|---------------------------------|
| <b>All-cause mortality</b>          |    |                      |                      |                      |                           |                                 |
| Sex                                 |    |                      |                      |                      |                           | 0.41                            |
| Male                                | 1  | 0.86(0.67,1.11) 0.25 | 1.08(0.83,1.40) 0.57 | 1.00(0.76,1.32) 1.00 | 0.57                      |                                 |
| Female                              | 1  | 1.03(0.82,1.29) 0.80 | 0.97(0.79,1.19) 0.77 | 0.98(0.76,1.27) 0.89 | 0.78                      |                                 |
| Age, years                          |    |                      |                      |                      |                           | 0.92                            |
| <60                                 | 1  | 0.97(0.63,1.48) 0.88 | 1.16(0.79,1.71) 0.44 | 1.09(0.68,1.74) 0.73 | 0.56                      |                                 |
| ≥60                                 | 1  | 0.92(0.77,1.10) 0.37 | 0.94(0.78,1.13) 0.50 | 0.93(0.76,1.15) 0.51 | 0.65                      |                                 |
| BMI, kg/m <sup>2</sup>              |    |                      |                      |                      |                           | 0.56                            |
| Normal weight (<25)                 | 1  | 0.88(0.67,1.16) 0.37 | 0.98(0.72,1.33) 0.90 | 1.15(0.84,1.57) 0.39 | 0.22                      |                                 |
| Overweight (25-30)                  | 1  | 0.79(0.58,1.09) 0.15 | 0.87(0.65,1.17) 0.36 | 0.81(0.55,1.18) 0.28 | 0.44                      |                                 |
| Obesity (≥30)                       | 1  | 1.07(0.80,1.44) 0.64 | 1.16(0.84,1.61) 0.37 | 0.96(0.70,1.31) 0.78 | 0.93                      |                                 |
| Race                                |    |                      |                      |                      |                           | 0.75                            |
| Non-Hispanic White                  | 1  | 0.94(0.76,1.16) 0.57 | 1.02(0.84,1.24) 0.80 | 0.99(0.79,1.25) 0.94 | 0.84                      |                                 |
| Non-Hispanic Black                  | 1  | 0.87(0.63,1.21) 0.41 | 0.94(0.59,1.48) 0.79 | 0.77(0.52,1.15) 0.20 | 0.29                      |                                 |
| Mexican American                    | 1  | 1.08(0.63,1.85) 0.78 | 0.95(0.53,1.70) 0.86 | 1.29(0.71,2.33) 0.40 | 0.53                      |                                 |
| Others                              | 1  | 0.89(0.51,1.54) 0.68 | 1.09(0.65,1.84) 0.75 | 1.09(0.56,2.14) 0.80 | 0.65                      |                                 |
| Education level                     |    |                      |                      |                      |                           | 0.55                            |
| Less than high school               | 1  | 0.93(0.71,1.22) 0.58 | 0.87(0.68,1.11) 0.25 | 1.04(0.78,1.38) 0.81 | 0.92                      |                                 |
| High school or equivalent           | 1  | 0.87(0.64,1.19) 0.39 | 1.15(0.82,1.60) 0.42 | 0.86(0.58,1.28) 0.46 | 0.78                      |                                 |
| College or above                    | 1  | 0.96(0.71,1.29) 0.77 | 0.97(0.74,1.28) 0.85 | 0.98(0.71,1.36) 0.92 | 1                         |                                 |
| Family income-poverty ratio         |    |                      |                      |                      |                           | 0.58                            |
| <1.0                                | 1  | 1.10(0.73,1.65) 0.64 | 0.91(0.65,1.27) 0.58 | 1.00(0.72,1.39) 0.99 | 0.74                      |                                 |
| 1.0-3.0                             | 1  | 0.81(0.65,1.01) 0.06 | 0.91(0.73,1.15) 0.43 | 0.89(0.70,1.14) 0.37 | 0.66                      |                                 |
| >3.0                                | 1  | 1.15(0.78,1.70) 0.48 | 1.34(0.91,1.98) 0.13 | 1.19(0.79,1.80) 0.40 | 0.39                      |                                 |
| Smoking status                      |    |                      |                      |                      |                           | 0.81                            |
| Never                               | 1  | 0.99(0.77,1.26) 0.91 | 0.99(0.77,1.26) 0.91 | 1.03(0.80,1.32) 0.84 | 0.81                      |                                 |
| Former                              | 1  | 0.91(0.69,1.21) 0.52 | 1.02(0.79,1.31) 0.91 | 0.95(0.73,1.22) 0.67 | 0.92                      |                                 |
| Current                             | 1  | 0.95(0.69,1.33) 0.78 | 1.07(0.76,1.50) 0.71 | 0.99(0.60,1.64) 0.97 | 0.92                      |                                 |
| Alcohol drinking                    |    |                      |                      |                      |                           | 0.76                            |
| Never                               | 1  | 1.00(0.79,1.27) 0.98 | 1.02(0.77,1.37) 0.87 | 0.89(0.68,1.19) 0.44 | 0.52                      |                                 |
| Low to moderate                     | 1  | 0.89(0.67,1.16) 0.39 | 0.97(0.75,1.26) 0.82 | 0.99(0.73,1.36) 0.97 | 0.78                      |                                 |
| Heavy                               | 1  | 0.83(0.55,1.27) 0.39 | 1.01(0.65,1.58) 0.95 | 1.00(0.67,1.48) 0.99 | 0.74                      |                                 |
| Healthy eating index score          |    |                      |                      |                      |                           | 0.24                            |
| Quarter 1                           | 1  | 0.78(0.54,1.12) 0.18 | 0.83(0.58,1.18) 0.30 | 0.59(0.40,0.86) 0.01 | 0.02                      |                                 |
| Quarter 2                           | 1  | 1.22(0.88,1.71) 0.23 | 1.15(0.81,1.64) 0.42 | 1.19(0.84,1.68) 0.34 | 0.44                      |                                 |
| Quarter 3                           | 1  | 1.24(0.92,1.67) 0.16 | 1.25(0.88,1.76) 0.21 | 1.38(0.99,1.91) 0.06 | 0.11                      |                                 |
| Quarter 4                           | 1  | 0.64(0.41,1.01) 0.06 | 0.88(0.59,1.30) 0.51 | 0.80(0.53,1.20) 0.28 | 0.85                      |                                 |
| Total energy intake from diet, kcal |    |                      |                      |                      |                           | 0.33                            |
| [0,1445.5]                          | 1  | 1.08(0.84,1.39) 0.56 | 1.07(0.85,1.34) 0.58 | 1.00(0.74,1.35) 0.99 | 0.89                      |                                 |
| (1445.5,1908]                       | 1  | 0.84(0.60,1.17) 0.31 | 0.81(0.57,1.14) 0.22 | 1.02(0.69,1.49) 0.94 | 0.92                      |                                 |
| (1908,2494.5]                       | 1  | 0.83(0.55,1.26) 0.39 | 1.17(0.77,1.79) 0.47 | 1.03(0.66,1.59) 0.91 | 0.4                       |                                 |
| (2494.5,15594]                      | 1  | 0.73(0.40,1.34) 0.31 | 0.96(0.61,1.49) 0.84 | 0.77(0.46,1.29) 0.32 | 0.46                      |                                 |
| Self reported health                |    |                      |                      |                      |                           | 0.09                            |
| Very good to excellent              | 1  | 1.07(0.81,1.41) 0.63 | 1.27(0.98,1.64) 0.07 | 1.12(0.85,1.47) 0.41 | 0.27                      |                                 |

|                                          |   |                        |                      |                       |      |
|------------------------------------------|---|------------------------|----------------------|-----------------------|------|
| Good                                     | 1 | 0.82(0.61,1.10) 0.18   | 0.77(0.55,1.08) 0.13 | 0.79(0.56,1.12) 0.19  | 0.23 |
| Poor to fair                             | 1 | 0.82(0.61,1.11) 0.46   | 0.99(0.75,1.32) 0.96 | 1.03(0.77,1.38) 0.84  | 0.60 |
| Family history of cardiovascular disease |   |                        |                      |                       | 0.24 |
| No                                       | 1 | 0.92(0.75,1.14) 0.46   | 1.00(0.82,1.23) 0.98 | 1.08(0.87,1.32) 0.49  | 0.32 |
| Yes                                      | 1 | 0.94(0.68,1.31) 0.73   | 1.03(0.72,1.46) 0.88 | 0.76(0.53,1.09) 0.14  | 0.18 |
| Cardiovascular disease                   |   |                        |                      |                       | 0.70 |
| No                                       | 1 | 0.90(0.73,1.12) 0.36   | 1.02(0.85,1.22) 0.85 | 0.94(0.74,1.19) 0.60  | 0.86 |
| Yes                                      | 1 | 0.99(0.74,1.32) 0.95   | 1.03(0.77,1.37) 0.85 | 1.10(0.82,1.49) 0.53  | 0.48 |
| Chronic obstructive pulmonary diseases   |   |                        |                      |                       | 0.85 |
| No                                       | 1 | 0.94(0.79,1.12) 0.48   | 1.03(0.87,1.23) 0.72 | 1.03(0.85,1.24) 0.79  | 0.54 |
| Yes                                      | 1 | 0.79(0.48,1.31) 0.35   | 0.85(0.52,1.40) 0.53 | 0.70(0.40,1.22) 0.21  | 0.32 |
| History of chronic kidney disease        |   |                        |                      |                       | 0.78 |
| No                                       | 1 | 0.93(0.78,1.11) 0.40   | 1.00(0.84,1.19) 0.98 | 0.97(0.80,1.18) 0.76  | 0.99 |
| Yes                                      | 1 | 1.01(0.39,2.63) 0.98   | 1.32(0.60,2.92) 0.49 | 1.12(0.47,2.66) 0.80  | 0.69 |
| Cancer                                   |   |                        |                      |                       | 0.47 |
| No                                       | 1 | 0.91(0.75,1.11) 0.35   | 1.08(0.89,1.30) 0.46 | 1.04(0.83,1.30) 0.76  | 0.44 |
| Yes                                      | 1 | 0.99(0.67,1.46) 0.95   | 0.83(0.57,1.20) 0.32 | 0.83(0.56,1.21) 0.33  | 0.19 |
| <b>CVD mortality</b>                     |   |                        |                      |                       |      |
| Sex                                      |   |                        |                      |                       | 0.08 |
| Male                                     | 1 | 1.46(0.96,2.22) 0.08   | 1.61(1.05,2.48) 0.03 | 1.97(1.25,3.10) 0.004 | 0.01 |
| Female                                   | 1 | 0.99(0.65,1.50) 0.96   | 1.10(0.72,1.68) 0.67 | 0.79(0.48,1.30) 0.35  | 0.45 |
| Age, years                               |   |                        |                      |                       | 0.76 |
| <60                                      | 1 | 2.12(0.95,4.70) 0.07   | 1.75(0.64,4.82) 0.28 | 2.16(0.91,5.14) 0.08  | 0.14 |
| ≥60                                      | 1 | 1.03(0.74,1.43) 0.88   | 1.15(0.85,1.56) 0.35 | 1.14(0.79,1.64) 0.48  | 0.42 |
| BMI, kg/m2                               |   |                        |                      |                       | 0.27 |
| Normal weight (<25)                      | 1 | 0.80(0.46,1.40) 0.44   | 0.96(0.58,1.57) 0.86 | 1.45(0.81,2.57) 0.21  | 0.09 |
| Overweight (25-30)                       | 1 | 0.92(0.52,1.64) 0.78   | 1.12(0.66,1.91) 0.68 | 1.03(0.53,2.01) 0.92  | 0.76 |
| Obesity (≥30)                            | 1 | 1.67(0.98,2.83) 0.06   | 1.71(0.94,3.10) 0.08 | 1.41(0.80,2.48) 0.23  | 0.33 |
| Race                                     |   |                        |                      |                       | 0.31 |
| Non-Hispanic White                       | 1 | 1.24(0.83,1.86) 0.30   | 1.46(0.99,2.17) 0.06 | 1.38(0.89,2.14) 0.16  | 0.18 |
| Non-Hispanic Black                       | 1 | 1.27(0.69,2.34) 0.44   | 0.78(0.36,1.72) 0.54 | 0.95(0.44,2.06) 0.89  | 0.68 |
| Mexican American                         | 1 | 1.42(0.64,3.13) 0.39   | 1.17(0.38,3.58) 0.78 | 3.16(1.05,9.55) 0.04  | 0.09 |
| Others                                   | 1 | 1.00(0.35,2.90) 0.99   | 0.53(0.14,1.96) 0.34 | 1.96(0.54,7.16) 0.31  | 0.49 |
| Education level                          |   |                        |                      |                       | 0.46 |
| Less than high school                    | 1 | 1.23(0.82,1.84) 0.32   | 0.97(0.62,1.52) 0.89 | 1.18(0.73,1.90) 0.50  | 0.77 |
| High school or equivalent                | 1 | 1.00(0.50,1.98) 1.00   | 1.85(0.94,3.63) 0.07 | 1.84(0.89,3.78) 0.10  | 0.03 |
| College or above                         | 1 | 1.14(0.64,2.03) 0.66   | 1.16(0.66,2.04) 0.61 | 1.09(0.64,1.87) 0.75  | 0.86 |
| Family income-poverty ratio              |   |                        |                      |                       | 0.09 |
| <1.0                                     | 1 | 2.22(1.29,3.82) 0.004  | 1.05(0.55,2.00) 0.87 | 1.68(0.87,3.22) 0.12  | 0.57 |
| 1.0-3.0                                  | 1 | 0.83(0.56,1.24) 0.37   | 1.02(0.67,1.56) 0.91 | 1.02(0.63,1.66) 0.94  | 0.70 |
| >3.0                                     | 1 | 1.86(0.84,4.08) 0.12   | 2.45(1.13,5.34) 0.02 | 2.11(1.02,4.36) 0.04  | 0.06 |
| Smoking status                           |   |                        |                      |                       | 0.16 |
| Never                                    | 1 | 0.89(0.57,1.37) 0.59   | 1.31(0.81,2.10) 0.27 | 1.10(0.70,1.72) 0.68  | 0.37 |
| Former                                   | 1 | 0.97(0.56,1.69) 0.91   | 1.06(0.65,1.74) 0.82 | 1.20(0.69,2.09) 0.51  | 0.41 |
| Current                                  | 1 | 2.51(1.50,4.20) <0.001 | 1.47(0.71,3.04) 0.29 | 2.30(1.04,5.11) 0.04  | 0.15 |
| Alcohol drinking                         |   |                        |                      |                       | 0.31 |
| Never                                    | 1 | 1.06(0.69,1.62) 0.79   | 1.25(0.76,2.06) 0.38 | 0.81(0.47,1.40) 0.45  | 0.61 |



|                                          |   |                       |                       |                       |       |
|------------------------------------------|---|-----------------------|-----------------------|-----------------------|-------|
| Low to moderate                          | 1 | 1.13(0.68,1.87) 0.63  | 1.33(0.74,2.40) 0.35  | 1.51(0.90,2.53) 0.12  | 0.12  |
| Heavy                                    | 1 | 1.54(0.78,3.05) 0.21  | 1.25(0.66,2.38) 0.50  | 2.03(1.02,4.06) 0.04  | 0.11  |
| Healthy eating index score               |   |                       |                       |                       | 0.45  |
| Quarter 1                                | 1 | 0.81(0.46,1.41) 0.45  | 1.12(0.55,2.28) 0.76  | 0.85(0.39,1.85) 0.68  | 0.94  |
| Quarter 2                                | 1 | 1.21(0.51,2.87) 0.66  | 1.08(0.56,2.08) 0.81  | 1.76(0.79,3.89) 0.16  | 0.14  |
| Quarter 3                                | 1 | 1.67(0.98,2.86) 0.06  | 1.48(0.79,2.75) 0.22  | 1.26(0.71,2.25) 0.43  | 0.86  |
| Quarter 4                                | 1 | 1.30(0.64,2.66) 0.47  | 2.09(1.02,4.28) 0.04  | 2.01(0.93,4.34) 0.08  | 0.05  |
| Total energy intake from diet, kcal      |   |                       |                       |                       | 0.45  |
| [0,1445.5]                               | 1 | 1.16(0.77,1.73) 0.48  | 1.32(0.89,1.96) 0.17  | 1.08(0.60,1.95) 0.79  | 0.54  |
| (1445.5,1908]                            | 1 | 0.76(0.40,1.46) 0.42  | 0.90(0.47,1.73) 0.75  | 1.22(0.68,2.21) 0.50  | 0.26  |
| (1908,2494.5]                            | 1 | 1.49(0.78,2.82) 0.22  | 2.26(1.12,4.55) 0.02  | 1.90(0.99,3.64) 0.05  | 0.03  |
| (2494.5,15594]                           | 1 | 2.00(0.71,5.66) 0.19  | 0.91(0.30,2.73) 0.87  | 1.28(0.41,3.99) 0.66  | 0.77  |
| Self reported health                     |   |                       |                       |                       | 0.32  |
| Very good to excellent                   | 1 | 1.15(0.77,1.71) 0.50  | 1.43(0.89,2.29) 0.14  | 1.09(0.71,1.66) 0.70  | 0.56  |
| Good                                     | 1 | 1.10(0.64,1.89) 0.73  | 1.02(0.59,1.76) 0.95  | 1.04(0.54,1.99) 0.92  | 0.98  |
| Poor to fair                             | 1 | 1.22(0.61,2.42) 0.58  | 1.40(0.78,2.50) 0.26  | 1.99(1.06,3.74) 0.03  | 0.02  |
| Family history of cardiovascular disease |   |                       |                       |                       | 0.57  |
| No                                       | 1 | 1.10(0.78,1.55) 0.59  | 1.28(0.87,1.89) 0.21  | 1.34(0.89,2.03) 0.16  | 0.14  |
| Yes                                      | 1 | 1.41(0.83,2.40) 0.20  | 1.35(0.79,2.30) 0.28  | 1.25(0.67,2.34) 0.48  | 0.68  |
| Cardiovascular disease                   |   |                       |                       |                       | 0.27  |
| No                                       | 1 | 1.13(0.76,1.68) 0.55  | 1.14(0.73,1.78) 0.56  | 1.07(0.68,1.69) 0.78  | 0.85  |
| Yes                                      | 1 | 1.31(0.81,2.12) 0.26  | 1.69(1.14,2.51) 0.01  | 1.84(1.12,3.03) 0.02  | 0.02  |
| Chronic obstructive pulmonary diseases   |   |                       |                       |                       | 0.11  |
| No                                       | 1 | 1.10(0.80,1.51) 0.57  | 1.28(0.92,1.79) 0.14  | 1.36(0.95,1.93) 0.09  | 0.07  |
| Yes                                      | 1 | 1.14(0.35,3.69) 0.83  | 1.44(0.53,3.91) 0.47  | 0.83(0.21,3.21) 0.79  | 0.92  |
| History of chronic kidney disease        |   |                       |                       |                       | 0.29  |
| No                                       | 1 | 1.18(0.86,1.61) 0.31  | 1.27(0.91,1.79) 0.16  | 1.25(0.87,1.80) 0.23  | 0.27  |
| Yes                                      | 1 | 0.93(0.16, 5.52) 0.93 | 0.82(0.10, 6.51) 0.85 | 1.63(0.26,10.09) 0.60 | 0.40  |
| Cancer                                   |   |                       |                       |                       | 0.61  |
| No                                       | 1 | 1.33(0.94,1.88) 0.11  | 1.53(1.08,2.18) 0.02  | 1.52(1.01,2.28) 0.04  | 0.04  |
| Yes                                      | 1 | 0.79(0.32,1.96) 0.62  | 0.73(0.33,1.61) 0.43  | 0.77(0.37,1.60) 0.48  | 0.53  |
| <b>Cancer mortality</b>                  |   |                       |                       |                       |       |
| Sex                                      |   |                       |                       |                       | 0.001 |
| Male                                     | 1 | 0.49(0.31,0.79) 0.003 | 1.01(0.65,1.57) 0.96  | 0.68(0.43,1.08) 0.10  | 0.55  |
| Female                                   | 1 | 1.20(0.76,1.90) 0.43  | 0.64(0.41,1.01) 0.05  | 0.78(0.45,1.32) 0.35  | 0.08  |
| Age, years                               |   |                       |                       |                       | 0.3   |
| <60                                      | 1 | 0.70(0.32,1.53) 0.37  | 1.27(0.72,2.26) 0.41  | 0.75(0.32,1.74) 0.50  | 0.83  |
| ≥60                                      | 1 | 0.80(0.56,1.14) 0.21  | 0.70(0.50,0.98) 0.04  | 0.67(0.46,0.97) 0.04  | 0.04  |
| BMI, kg/m2                               |   |                       |                       |                       | 0.21  |
| Normal weight (<25)                      | 1 | 0.56(0.32,0.97) 0.04  | 0.98(0.49,1.98) 0.97  | 0.86(0.45,1.63) 0.64  | 0.93  |
| Overweight (25-30)                       | 1 | 0.60(0.33,1.07) 0.09  | 0.55(0.31,1.00) 0.05  | 0.57(0.31,1.05) 0.07  | 0.14  |
| Obesity (≥30)                            | 1 | 1.00(0.58,1.74) 1.00  | 1.06(0.60,1.85) 0.84  | 0.56(0.30,1.04) 0.07  | 0.10  |
| Race                                     |   |                       |                       |                       | 0.59  |
| Non-Hispanic White                       | 1 | 0.77(0.53,1.14) 0.19  | 0.84(0.60,1.17) 0.31  | 0.69(0.45,1.04) 0.08  | 0.11  |
| Non-Hispanic Black                       | 1 | 0.89(0.49,1.62) 0.71  | 0.86(0.46,1.63) 0.64  | 0.75(0.38,1.47) 0.40  | 0.39  |
| Mexican American                         | 1 | 0.81(0.35,1.90) 0.63  | 0.76(0.24,2.44) 0.64  | 0.48(0.13,1.79) 0.28  | 0.26  |

|                                          |   |                      |                      |                        |       |      |
|------------------------------------------|---|----------------------|----------------------|------------------------|-------|------|
| Others                                   | 1 | 0.24(0.07,0.78) 0.02 | 1.30(0.42,4.02) 0.65 | 0.82(0.27,2.48) 0.73   | 0.77  |      |
| Education level                          |   |                      |                      |                        |       | 0.23 |
| Less than high school                    | 1 | 0.58(0.31,1.07) 0.08 | 0.92(0.54,1.55) 0.75 | 0.70(0.40,1.22) 0.21   | 0.46  |      |
| High school or equivalent                | 1 | 0.85(0.47,1.52) 0.58 | 0.88(0.46,1.70) 0.71 | 0.38(0.16,0.89) 0.03   | 0.03  |      |
| College or above                         | 1 | 0.79(0.47,1.33) 0.38 | 0.74(0.49,1.12) 0.16 | 0.84(0.52,1.36) 0.48   | 0.59  |      |
| Family income-poverty ratio              |   |                      |                      |                        |       | 0.13 |
| <1.0                                     | 1 | 0.76(0.31,1.81) 0.53 | 0.81(0.39,1.72) 0.59 | 0.43(0.19,0.98) 0.04   | 0.07  |      |
| 1.0-3.0                                  | 1 | 0.62(0.38,1.02) 0.06 | 0.59(0.35,1.00) 0.05 | 0.44(0.27,0.71) <0.001 | 0.003 |      |
| >3.0                                     | 1 | 1.14(0.68,1.91) 0.63 | 1.52(0.95,2.43) 0.08 | 1.31(0.81,2.12) 0.27   | 0.26  |      |
| Smoking status                           |   |                      |                      |                        |       | 0.18 |
| Never                                    | 1 | 0.86(0.49,1.51) 0.61 | 0.59(0.30,1.17) 0.13 | 0.76(0.41,1.39) 0.37   | 0.29  |      |
| Former                                   | 1 | 0.93(0.57,1.51) 0.77 | 1.12(0.68,1.86) 0.66 | 0.70(0.41,1.22) 0.21   | 0.25  |      |
| Current                                  | 1 | 0.56(0.30,1.04) 0.07 | 0.80(0.47,1.36) 0.41 | 0.68(0.33,1.39) 0.29   | 0.39  |      |
| Alcohol drinking                         |   |                      |                      |                        |       | 0.89 |
| Never                                    | 1 | 0.95(0.59,1.51) 0.82 | 0.97(0.53,1.80) 0.93 | 0.68(0.41,1.13) 0.14   | 0.23  |      |
| Low to moderate                          | 1 | 0.66(0.42,1.07) 0.09 | 0.72(0.48,1.07) 0.10 | 0.63(0.35,1.14) 0.13   | 0.18  |      |
| Heavy                                    | 1 | 0.67(0.29,1.53) 0.34 | 0.96(0.44,2.07) 0.91 | 0.71(0.37,1.35) 0.30   | 0.52  |      |
| Healthy eating index score               |   |                      |                      |                        |       | 0.79 |
| Quarter 1                                | 1 | 0.58(0.29,1.15) 0.12 | 0.60(0.29,1.22) 0.16 | 0.34(0.15,0.76) 0.01   | 0.01  |      |
| Quarter 2                                | 1 | 1.08(0.54,2.16) 0.82 | 1.14(0.55,2.34) 0.72 | 0.83(0.39,1.78) 0.63   | 0.68  |      |
| Quarter 3                                | 1 | 1.15(0.57,2.32) 0.69 | 1.24(0.57,2.72) 0.59 | 1.21(0.61,2.42) 0.59   | 0.61  |      |
| Quarter 4                                | 1 | 0.46(0.21,1.04) 0.06 | 0.64(0.33,1.24) 0.19 | 0.56(0.30,1.06) 0.08   | 0.27  |      |
| Total energy intake from diet, kcal      |   |                      |                      |                        |       | 0.06 |
| [0,1445.5]                               | 1 | 1.27(0.75,2.15) 0.38 | 0.85(0.50,1.44) 0.53 | 0.54(0.28,1.04) 0.07   | 0.04  |      |
| (1445.5,1908]                            | 1 | 0.53(0.31,0.89) 0.02 | 0.53(0.25,1.12) 0.10 | 0.63(0.33,1.20) 0.16   | 0.21  |      |
| (1908,2494.5]                            | 1 | 0.58(0.33,1.05) 0.07 | 0.70(0.40,1.22) 0.21 | 0.70(0.39,1.23) 0.21   | 0.64  |      |
| (2494.5,15594]                           | 1 | 0.57(0.20,1.60) 0.29 | 1.55(0.77,3.13) 0.22 | 0.84(0.39,1.82) 0.66   | 0.95  |      |
| Self reported health                     |   |                      |                      |                        |       | 0.37 |
| Very good to excellent                   | 1 | 0.79(0.42,1.50) 0.48 | 0.77(0.45,1.30) 0.33 | 0.66(0.37,1.19) 0.17   | 0.17  |      |
| Good                                     | 1 | 0.75(0.45,1.26) 0.28 | 0.51(0.28,0.95) 0.03 | 0.50(0.28,0.88) 0.02   | 0.01  |      |
| Poor to fair                             | 1 | 0.70(0.41,1.21) 0.20 | 1.19(0.72,1.95) 0.49 | 0.87(0.47,1.60) 0.65   | 0.93  |      |
| Family history of cardiovascular disease |   |                      |                      |                        |       | 0.69 |
| No                                       | 1 | 0.73(0.48,1.10) 0.13 | 0.82(0.55,1.22) 0.32 | 0.76(0.51,1.14) 0.19   | 0.33  |      |
| Yes                                      | 1 | 0.89(0.49,1.60) 0.69 | 0.88(0.48,1.61) 0.68 | 0.55(0.29,1.06) 0.07   | 0.07  |      |
| Cardiovascular disease                   |   |                      |                      |                        |       | 0.76 |
| No                                       | 1 | 0.75(0.51,1.09) 0.13 | 0.87(0.64,1.20) 0.40 | 0.73(0.49,1.09) 0.13   | 0.23  |      |
| Yes                                      | 1 | 0.83(0.48,1.43) 0.50 | 0.75(0.41,1.39) 0.37 | 0.51(0.26,1.00) 0.05   | 0.05  |      |
| Chronic obstructive pulmonary diseases   |   |                      |                      |                        |       | 0.56 |
| No                                       | 1 | 0.79(0.56,1.11) 0.18 | 0.92(0.69,1.25) 0.60 | 0.76(0.53,1.10) 0.14   | 0.24  |      |
| Yes                                      | 1 | 0.53(0.15,1.90) 0.33 | 0.32(0.09,1.09) 0.07 | 0.26(0.07,1.01) 0.05   | 0.03  |      |
| History of chronic kidney disease        |   |                      |                      |                        |       | 0.12 |
| No                                       | 1 | 0.74(0.54,1.03) 0.07 | 0.86(0.65,1.14) 0.28 | 0.71(0.50,1.02) 0.06   | 0.12  |      |
| Yes                                      | 1 | 2.15(0.52,8.90) 0.29 | 0.32(0.04,2.93) 0.32 | 0.14(0.03,0.75) 0.02   | 0.02  |      |
| Cancer                                   |   |                      |                      |                        |       | 0.13 |
| No                                       | 1 | 0.62(0.43,0.91) 0.02 | 0.85(0.59,1.22) 0.37 | 0.63(0.40,0.99) 0.05   | 0.12  |      |
| Yes                                      | 1 | 1.45(0.72,2.90) 0.29 | 1.00(0.51,1.98) 0.99 | 1.11(0.54,2.30) 0.77   | 0.77  |      |
| <b>Other mortality</b>                   |   |                      |                      |                        |       |      |

|                                          |   |                 |      |                 |      |                 |      |      |
|------------------------------------------|---|-----------------|------|-----------------|------|-----------------|------|------|
| Sex                                      |   |                 |      |                 |      |                 | 0.39 |      |
| Male                                     | 1 | 0.88(0.58,1.32) | 0.52 | 0.88(0.59,1.30) | 0.51 | 0.82(0.53,1.28) | 0.39 | 0.42 |
| Female                                   | 1 | 0.94(0.67,1.32) | 0.72 | 1.11(0.82,1.50) | 0.50 | 1.22(0.86,1.72) | 0.26 | 0.16 |
| Age, years                               |   |                 |      |                 |      |                 |      | 0.97 |
| <60                                      | 1 | 0.91(0.50,1.64) | 0.74 | 0.89(0.51,1.55) | 0.68 | 1.07(0.56,2.04) | 0.83 | 0.87 |
| ≥60                                      | 1 | 0.92(0.69,1.24) | 0.59 | 0.96(0.74,1.25) | 0.79 | 0.95(0.71,1.27) | 0.75 | 0.88 |
| BMI, kg/m2                               |   |                 |      |                 |      |                 |      | 0.95 |
| Normal weight (<25)                      | 1 | 1.12(0.71,1.78) | 0.61 | 1.00(0.66,1.53) | 0.98 | 1.11(0.72,1.70) | 0.65 | 0.78 |
| Overweight (25-30)                       | 1 | 0.84(0.53,1.35) | 0.47 | 0.96(0.62,1.51) | 0.88 | 0.83(0.46,1.48) | 0.52 | 0.65 |
| Obesity (≥30)                            | 1 | 0.84(0.53,1.34) | 0.47 | 0.95(0.61,1.48) | 0.80 | 1.05(0.69,1.60) | 0.81 | 0.70 |
| Race                                     |   |                 |      |                 |      |                 |      | 0.41 |
| Non-Hispanic White                       | 1 | 0.90(0.65,1.25) | 0.54 | 0.95(0.69,1.29) | 0.74 | 1.01(0.72,1.41) | 0.97 | 0.81 |
| Non-Hispanic Black                       | 1 | 0.67(0.39,1.16) | 0.15 | 1.06(0.52,2.13) | 0.87 | 0.69(0.39,1.22) | 0.21 | 0.46 |
| Mexican American                         | 1 | 1.11(0.46,2.70) | 0.81 | 0.93(0.38,2.30) | 0.88 | 1.34(0.51,3.53) | 0.55 | 0.68 |
| Others                                   | 1 | 1.39(0.57,3.40) | 0.46 | 1.21(0.59,2.47) | 0.60 | 1.02(0.34,3.09) | 0.97 | 0.91 |
| Education level                          |   |                 |      |                 |      |                 |      | 0.6  |
| Less than high school                    | 1 | 0.93(0.64,1.36) | 0.71 | 0.77(0.52,1.14) | 0.19 | 1.13(0.75,1.73) | 0.56 | 0.75 |
| High school or equivalent                | 1 | 0.83(0.50,1.37) | 0.46 | 1.03(0.61,1.74) | 0.92 | 0.80(0.47,1.36) | 0.41 | 0.61 |
| College or above                         | 1 | 0.98(0.58,1.67) | 0.94 | 1.03(0.63,1.70) | 0.91 | 0.99(0.56,1.77) | 0.99 | 0.97 |
| Family income-poverty ratio              |   |                 |      |                 |      |                 |      | 0.46 |
| <1.0                                     | 1 | 0.91(0.55,1.52) | 0.73 | 0.99(0.62,1.59) | 0.96 | 1.11(0.66,1.86) | 0.68 | 0.68 |
| 1.0-3.0                                  | 1 | 0.94(0.68,1.29) | 0.69 | 1.08(0.81,1.45) | 0.59 | 1.14(0.82,1.58) | 0.44 | 0.28 |
| >3.0                                     | 1 | 0.87(0.45,1.67) | 0.67 | 0.83(0.45,1.54) | 0.56 | 0.75(0.37,1.52) | 0.42 | 0.40 |
| Smoking status                           |   |                 |      |                 |      |                 |      | 0.65 |
| Never                                    | 1 | 1.14(0.73,1.79) | 0.56 | 0.99(0.65,1.51) | 0.97 | 1.11(0.71,1.72) | 0.65 | 0.83 |
| Former                                   | 1 | 0.88(0.57,1.35) | 0.56 | 0.93(0.63,1.38) | 0.72 | 0.97(0.67,1.39) | 0.85 | 0.98 |
| Current                                  | 1 | 0.81(0.47,1.37) | 0.43 | 1.12(0.66,1.89) | 0.69 | 0.96(0.47,1.96) | 0.91 | 0.88 |
| Alcohol drinking                         |   |                 |      |                 |      |                 |      | 0.9  |
| Never                                    | 1 | 0.97(0.65,1.46) | 0.88 | 0.90(0.57,1.43) | 0.67 | 1.05(0.66,1.67) | 0.84 | 0.90 |
| Low to moderate                          | 1 | 0.96(0.64,1.44) | 0.85 | 1.01(0.68,1.50) | 0.97 | 1.03(0.64,1.65) | 0.89 | 0.82 |
| Heavy                                    | 1 | 0.66(0.36,1.23) | 0.19 | 0.95(0.49,1.84) | 0.88 | 0.82(0.45,1.49) | 0.51 | 0.81 |
| Healthy eating index score               |   |                 |      |                 |      |                 |      | 0.57 |
| Quarter 1                                | 1 | 0.90(0.50,1.60) | 0.72 | 0.86(0.48,1.52) | 0.60 | 0.67(0.36,1.25) | 0.21 | 0.25 |
| Quarter 2                                | 1 | 1.26(0.79,2.01) | 0.34 | 1.21(0.77,1.92) | 0.41 | 1.08(0.68,1.71) | 0.76 | 0.89 |
| Quarter 3                                | 1 | 1.00(0.64,1.55) | 0.98 | 1.12(0.69,1.83) | 0.64 | 1.55(0.88,2.72) | 0.13 | 0.10 |
| Quarter 4                                | 1 | 0.61(0.31,1.21) | 0.16 | 0.73(0.41,1.30) | 0.28 | 0.64(0.35,1.18) | 0.15 | 0.34 |
| Total energy intake from diet, kcal      |   |                 |      |                 |      |                 |      | 0.46 |
| [0,1445.5]                               | 1 | 0.92(0.64,1.32) | 0.65 | 1.05(0.72,1.54) | 0.80 | 1.20(0.76,1.89) | 0.44 | 0.43 |
| (1445.5,1908]                            | 1 | 1.13(0.68,1.90) | 0.64 | 1.02(0.66,1.59) | 0.93 | 1.15(0.66,2.00) | 0.63 | 0.75 |
| (1908,2494.5]                            | 1 | 0.75(0.34,1.63) | 0.46 | 1.01(0.49,2.10) | 0.98 | 0.86(0.37,2.01) | 0.73 | 0.97 |
| (2494.5,15594]                           | 1 | 0.51(0.20,1.30) | 0.16 | 0.68(0.34,1.35) | 0.27 | 0.60(0.30,1.19) | 0.14 | 0.35 |
| Self reported health                     |   |                 |      |                 |      |                 |      | 0.02 |
| Very good to excellent                   | 1 | 1.22(0.80,1.86) | 0.35 | 1.48(0.97,2.25) | 0.07 | 1.40(0.88,2.23) | 0.15 | 0.10 |
| Good                                     | 1 | 0.68(0.41,1.14) | 0.14 | 0.79(0.49,1.26) | 0.32 | 0.82(0.46,1.45) | 0.49 | 0.73 |
| Poor to fair                             | 1 | 0.84(0.54,1.31) | 0.45 | 0.67(0.42,1.06) | 0.09 | 0.77(0.53,1.12) | 0.17 | 0.16 |
| Family history of cardiovascular disease |   |                 |      |                 |      |                 |      | 0.4  |
| No                                       | 1 | 0.97(0.71,1.33) | 0.85 | 0.96(0.70,1.33) | 0.82 | 1.13(0.82,1.56) | 0.46 | 0.44 |

|                                        |   |                      |                      |                      |      |
|----------------------------------------|---|----------------------|----------------------|----------------------|------|
| Yes                                    | 1 | 0.73(0.45,1.19) 0.21 | 1.01(0.60,1.70) 0.96 | 0.70(0.40,1.22) 0.21 | 0.41 |
| Cardiovascular disease                 |   |                      |                      |                      | 0.88 |
| No                                     | 1 | 0.91(0.65,1.28) 0.60 | 1.07(0.79,1.43) 0.67 | 1.02(0.73,1.43) 0.90 | 0.67 |
| Yes                                    | 1 | 0.89(0.58,1.37) 0.61 | 0.82(0.54,1.25) 0.36 | 0.98(0.61,1.59) 0.94 | 0.90 |
| Chronic obstructive pulmonary diseases |   |                      |                      |                      | 0.34 |
| No                                     | 1 | 0.95(0.71,1.29) 0.75 | 0.97(0.73,1.28) 0.80 | 1.02(0.76,1.37) 0.90 | 0.84 |
| Yes                                    | 1 | 0.69(0.33,1.46) 0.34 | 0.91(0.45,1.82) 0.79 | 0.81(0.39,1.69) 0.57 | 0.82 |
| History of chronic kidney disease      |   |                      |                      |                      | 0.6  |
| No                                     | 1 | 0.91(0.70,1.19) 0.50 | 0.95(0.73,1.24) 0.70 | 0.98(0.74,1.31) 0.90 | 0.97 |
| Yes                                    | 1 | 0.74(0.16,3.35) 0.70 | 1.97(0.52,7.47) 0.32 | 0.98(0.19,5.17) 0.98 | 0.66 |
| Cancer                                 |   |                      |                      |                      | 0.68 |
| No                                     | 1 | 0.90(0.67,1.21) 0.51 | 1.01(0.76,1.33) 0.96 | 1.08(0.78,1.50) 0.63 | 0.48 |
| Yes                                    | 1 | 0.83(0.49,1.41) 0.49 | 0.80(0.46,1.39) 0.42 | 0.65(0.39,1.10) 0.11 | 0.08 |

Adjusted for sex, age, race, BMI, educational level, smoking status, drinking status, family income poverty ratio, healthy eating index-2015, total energy intake from the diet, self-reported health status, family history of cardiovascular diseases, self-reported cardiovascular disease, self-reported chronic obstructive pulmonary disease, self-reported chronic kidney disease, and self-reported cancer.

**Supplementary Table 2.2** Subgroup analysis of hazard ratios for vitamin B1 levels with all-cause and CVD

mortality in participants with prediabetes from NHANES 1999-2018

|                                     | Q1 | Q2                   | Q3                   | Q4                   | <i>P</i> <sub>trend</sub> | <i>P</i> <sub>interaction</sub> |
|-------------------------------------|----|----------------------|----------------------|----------------------|---------------------------|---------------------------------|
| <b>All-cause mortality</b>          |    |                      |                      |                      |                           | 0.78                            |
| Sex                                 |    |                      |                      |                      |                           |                                 |
| Male                                | 1  | 1.03(0.79,1.34) 0.83 | 1.12(0.86,1.44) 0.41 | 1.12(0.82,1.55) 0.48 | 0.44                      |                                 |
| Female                              | 1  | 1.08(0.85,1.38) 0.51 | 1.21(0.97,1.51) 0.09 | 1.00(0.75,1.35) 0.98 | 0.45                      |                                 |
| Age, years                          |    |                      |                      |                      |                           | 0.71                            |
| <60                                 | 1  | 0.86(0.57,1.30) 0.48 | 1.12(0.76,1.66) 0.56 | 1.13(0.72,1.77) 0.60 | 0.39                      |                                 |
| ≥60                                 | 1  | 1.07(0.92,1.25) 0.39 | 1.11(0.94,1.32) 0.23 | 1.02(0.83,1.26) 0.85 | 0.72                      |                                 |
| BMI, kg/m <sup>2</sup>              |    |                      |                      |                      |                           | 0.12                            |
| Normal weight (<25)                 | 1  | 1.15(0.86,1.55) 0.34 | 1.42(1.03,1.95) 0.03 | 1.22(0.86,1.73) 0.26 | 0.11                      |                                 |
| Overweight (25-30)                  | 1  | 1.34(1.04,1.72) 0.02 | 1.36(1.02,1.80) 0.04 | 1.30(0.88,1.91) 0.18 | 0.27                      |                                 |
| Obesity (≥30)                       | 1  | 0.79(0.60,1.03) 0.08 | 0.82(0.60,1.10) 0.19 | 0.87(0.61,1.23) 0.43 | 0.45                      |                                 |
| Race                                |    |                      |                      |                      |                           | 0.79                            |
| Non-Hispanic White                  | 1  | 1.01(0.85,1.21) 0.90 | 1.13(0.94,1.36) 0.20 | 1.07(0.84,1.37) 0.58 | 0.41                      |                                 |
| Non-Hispanic Black                  | 1  | 1.19(0.84,1.69) 0.33 | 1.32(0.85,2.04) 0.22 | 1.33(0.87,2.03) 0.19 | 0.17                      |                                 |
| Mexican American                    | 1  | 1.01(0.62,1.63) 0.97 | 0.67(0.41,1.11) 0.12 | 0.69(0.35,1.35) 0.28 | 0.14                      |                                 |
| Others                              | 1  | 0.92(0.51,1.66) 0.79 | 0.99(0.55,1.76) 0.96 | 0.92(0.43,1.95) 0.82 | 0.88                      |                                 |
| Education level                     |    |                      |                      |                      |                           | 0.28                            |
| Less than high school               | 1  | 1.13(0.86,1.48) 0.39 | 1.07(0.80,1.42) 0.66 | 0.84(0.62,1.13) 0.24 | 0.3                       |                                 |
| High school or equivalent           | 1  | 1.06(0.78,1.44) 0.70 | 1.28(0.99,1.67) 0.06 | 1.42(0.97,2.07) 0.07 | 0.03                      |                                 |
| College or above                    | 1  | 0.95(0.74,1.21) 0.65 | 1.01(0.77,1.33) 0.95 | 1.01(0.72,1.41) 0.96 | 0.85                      |                                 |
| Family income-poverty ratio         |    |                      |                      |                      |                           | 0.71                            |
| <1.0                                | 1  | 1.14(0.80,1.63) 0.46 | 0.90(0.64,1.25) 0.52 | 1.05(0.72,1.54) 0.80 | 0.91                      |                                 |
| 1.0-3.0                             | 1  | 0.98(0.78,1.21) 0.82 | 1.09(0.87,1.35) 0.46 | 0.91(0.68,1.23) 0.54 | 0.79                      |                                 |
| >3.0                                | 1  | 1.15(0.82,1.61) 0.42 | 1.36(0.94,1.97) 0.10 | 1.38(0.91,2.10) 0.13 | 0.1                       |                                 |
| Smoking status                      |    |                      |                      |                      |                           | 0.02                            |
| Never                               | 1  | 1.05(0.81,1.35) 0.73 | 1.12(0.86,1.47) 0.40 | 0.99(0.73,1.35) 0.94 | 0.88                      |                                 |
| Former                              | 1  | 1.05(0.82,1.34) 0.70 | 0.97(0.74,1.28) 0.83 | 1.00(0.74,1.36) 0.98 | 0.88                      |                                 |
| Current                             | 1  | 0.88(0.61,1.27) 0.49 | 1.39(0.98,1.97) 0.06 | 1.25(0.76,2.08) 0.38 | 0.16                      |                                 |
| Alcohol drinking                    |    |                      |                      |                      |                           | 0.8                             |
| Never                               | 1  | 1.09(0.84,1.40) 0.52 | 1.20(0.94,1.53) 0.15 | 0.98(0.70,1.36) 0.90 | 0.79                      |                                 |
| Low to moderate                     | 1  | 0.97(0.77,1.23) 0.83 | 1.03(0.83,1.29) 0.77 | 1.15(0.84,1.57) 0.39 | 0.34                      |                                 |
| Heavy                               | 1  | 1.08(0.68,1.71) 0.74 | 1.14(0.79,1.65) 0.48 | 1.01(0.68,1.50) 0.95 | 0.92                      |                                 |
| Healthy eating index score          |    |                      |                      |                      |                           | 0.29                            |
| Quarter 1                           | 1  | 0.98(0.71,1.36) 0.90 | 1.18(0.81,1.72) 0.38 | 0.95(0.66,1.37) 0.78 | 0.82                      |                                 |
| Quarter 2                           | 1  | 1.37(1.05,1.77) 0.02 | 1.11(0.79,1.57) 0.55 | 1.13(0.75,1.69) 0.56 | 0.79                      |                                 |
| Quarter 3                           | 1  | 0.93(0.68,1.27) 0.64 | 0.97(0.72,1.31) 0.84 | 1.14(0.74,1.78) 0.55 | 0.55                      |                                 |
| Quarter 4                           | 1  | 0.94(0.68,1.32) 0.74 | 1.25(0.89,1.75) 0.19 | 1.06(0.73,1.54) 0.77 | 0.46                      |                                 |
| Total energy intake from diet, kcal |    |                      |                      |                      |                           | 0.73                            |
| [0,1445.5]                          | 1  | 1.08(0.87,1.35) 0.48 | 1.00(0.74,1.34) 0.98 | 1.11(0.78,1.57) 0.56 | 0.63                      |                                 |
| (1445.5,1908]                       | 1  | 1.11(0.81,1.53) 0.51 | 1.22(0.88,1.70) 0.23 | 1.01(0.63,1.61) 0.97 | 0.63                      |                                 |
| (1908,2494.5]                       | 1  | 0.89(0.63,1.27) 0.53 | 1.12(0.77,1.63) 0.54 | 1.17(0.82,1.67) 0.38 | 0.15                      |                                 |
| (2494.5,15594]                      | 1  | 0.80(0.41,1.57) 0.52 | 0.98(0.55,1.72) 0.93 | 0.85(0.50,1.43) 0.54 | 0.69                      |                                 |
| Self reported health                |    |                      |                      |                      |                           | 0.29                            |
| Very good to excellent              | 1  | 1.04(0.81,1.33) 0.75 | 1.22(0.95,1.56) 0.12 | 1.10(0.78,1.55) 0.60 | 0.38                      |                                 |
| Good                                | 1  | 1.10(0.84,1.44) 0.50 | 1.12(0.88,1.43) 0.37 | 1.08(0.77,1.51) 0.65 | 0.63                      |                                 |
| Poor to fair                        | 1  | 0.92(0.69,1.24) 0.60 | 1.00(0.72,1.39) 0.98 | 1.02(0.72,1.45) 0.92 | 0.81                      |                                 |

|                                          |   |                      |                      |                       |  |       |      |
|------------------------------------------|---|----------------------|----------------------|-----------------------|--|-------|------|
| Family history of cardiovascular disease |   |                      |                      |                       |  |       | 0.21 |
| No                                       | 1 | 1.08(0.90,1.29) 0.41 | 1.09(0.89,1.34) 0.39 | 1.13(0.88,1.46) 0.33  |  | 0.35  |      |
| Yes                                      | 1 | 0.91(0.64,1.28) 0.58 | 1.25(0.91,1.72) 0.17 | 0.92(0.65,1.30) 0.65  |  | 0.77  |      |
| Cardiovascular disease                   |   |                      |                      |                       |  |       | 0.27 |
| No                                       | 1 | 0.92(0.76,1.12) 0.40 | 1.07(0.88,1.31) 0.48 | 0.98(0.76,1.27) 0.88  |  | 0.8   |      |
| Yes                                      | 1 | 1.31(1.00,1.70) 0.05 | 1.26(0.95,1.67) 0.10 | 1.30(0.92,1.85) 0.14  |  | 0.15  |      |
| Chronic obstructive pulmonary diseases   |   |                      |                      |                       |  |       | 0.46 |
| No                                       | 1 | 1.02(0.85,1.23) 0.81 | 1.13(0.95,1.35) 0.18 | 1.06(0.85,1.32) 0.59  |  | 0.41  |      |
| Yes                                      | 1 | 0.95(0.61,1.48) 0.83 | 0.91(0.55,1.50) 0.71 | 1.16(0.65,2.07) 0.61  |  | 0.69  |      |
| History of chronic kidney disease        |   |                      |                      |                       |  |       | 0.56 |
| No                                       | 1 | 1.04(0.89,1.22) 0.62 | 1.14(0.96,1.36) 0.14 | 1.12(0.91,1.39) 0.30  |  | 0.21  |      |
| Yes                                      | 1 | 1.28(0.53,3.10) 0.59 | 1.18(0.54,2.57) 0.68 | 0.44(0.13,1.43) 0.17  |  | 0.39  |      |
| Cancer                                   |   |                      |                      |                       |  |       | 0.82 |
| No                                       | 1 | 1.02(0.85,1.22) 0.82 | 1.09(0.89,1.32) 0.40 | 1.07(0.83,1.37) 0.61  |  | 0.51  |      |
| Yes                                      | 1 | 1.19(0.87,1.63) 0.28 | 1.44(1.01,2.06) 0.04 | 1.33(0.91,1.93) 0.14  |  | 0.09  |      |
| <b>CVD mortality</b>                     |   |                      |                      |                       |  |       |      |
| Sex                                      |   |                      |                      |                       |  |       | 0.07 |
| Male                                     | 1 | 0.98(0.67,1.42) 0.91 | 1.19(0.80,1.78) 0.39 | 1.29(0.80,2.08) 0.30  |  | 0.19  |      |
| Female                                   | 1 | 1.32(0.91,1.92) 0.15 | 1.46(0.97,2.20) 0.07 | 0.81(0.43,1.52) 0.52  |  | 0.81  |      |
| Age, years                               |   |                      |                      |                       |  |       | 0.32 |
| <60                                      | 1 | 0.79(0.30,2.08) 0.63 | 0.84(0.34,2.10) 0.71 | 1.70(0.59,4.87) 0.32  |  | 0.33  |      |
| ≥60                                      | 1 | 1.18(0.89,1.58) 0.25 | 1.38(1.02,1.88) 0.04 | 1.09(0.75,1.58) 0.64  |  | 0.34  |      |
| BMI, kg/m <sup>2</sup>                   |   |                      |                      |                       |  |       | 0.81 |
| Normal weight (<25)                      | 1 | 1.19(0.72,1.97) 0.49 | 1.28(0.71,2.30) 0.41 | 1.34(0.72,2.50) 0.36  |  | 0.32  |      |
| Overweight (25-30)                       | 1 | 1.28(0.87,1.89) 0.21 | 1.60(1.02,2.50) 0.04 | 1.10(0.65,1.86) 0.72  |  | 0.53  |      |
| Obesity (≥30)                            | 1 | 0.92(0.55,1.52) 0.74 | 1.12(0.68,1.83) 0.65 | 1.27(0.67,2.41) 0.47  |  | 0.37  |      |
| Race                                     |   |                      |                      |                       |  |       | 0.59 |
| Non-Hispanic White                       | 1 | 1.09(0.77,1.54) 0.62 | 1.24(0.87,1.78) 0.23 | 1.17(0.77,1.80) 0.46  |  | 0.35  |      |
| Non-Hispanic Black                       | 1 | 1.28(0.70,2.34) 0.43 | 2.22(1.02,4.86) 0.04 | 1.20(0.57,2.55) 0.63  |  | 0.24  |      |
| Mexican American                         | 1 | 2.42(1.03,5.72) 0.04 | 1.12(0.39,3.24) 0.83 | 1.74(0.67,4.49) 0.26  |  | 0.64  |      |
| Others                                   | 1 | 0.81(0.20,3.35) 0.77 | 0.76(0.21,2.69) 0.67 | 1.26(0.14,11.06) 0.83 |  | 0.93  |      |
| Education level                          |   |                      |                      |                       |  |       | 0.11 |
| Less than high school                    | 1 | 1.09(0.70,1.68) 0.71 | 1.11(0.65,1.90) 0.70 | 0.84(0.46,1.52) 0.56  |  | 0.68  |      |
| High school or equivalent                | 1 | 1.57(0.87,2.81) 0.13 | 2.07(1.17,3.69) 0.01 | 3.20(1.54,6.68) 0.002 |  | 0.001 |      |
| College or above                         | 1 | 0.96(0.60,1.55) 0.87 | 1.06(0.65,1.74) 0.81 | 0.89(0.53,1.50) 0.66  |  | 0.78  |      |
| Family income-poverty ratio              |   |                      |                      |                       |  |       | 0.56 |
| <1.0                                     | 1 | 1.36(0.80,2.31) 0.25 | 0.96(0.54,1.71) 0.90 | 0.99(0.46,2.16) 0.99  |  | 0.82  |      |
| 1.0-3.0                                  | 1 | 1.22(0.84,1.79) 0.29 | 1.60(1.08,2.37) 0.02 | 1.25(0.78,2.01) 0.35  |  | 0.12  |      |
| >3.0                                     | 1 | 0.79(0.42,1.52) 0.48 | 0.96(0.55,1.67) 0.88 | 1.05(0.53,2.08) 0.88  |  | 0.71  |      |
| Smoking status                           |   |                      |                      |                       |  |       | 0.14 |
| Never                                    | 1 | 1.11(0.73,1.71) 0.62 | 1.37(0.90,2.08) 0.15 | 0.96(0.53,1.73) 0.90  |  | 0.76  |      |
| Former                                   | 1 | 1.09(0.65,1.82) 0.74 | 0.93(0.56,1.54) 0.77 | 1.03(0.57,1.84) 0.93  |  | 0.90  |      |
| Current                                  | 1 | 0.97(0.49,1.91) 0.93 | 1.79(0.86,3.70) 0.12 | 2.05(0.90,4.69) 0.09  |  | 0.04  |      |
| Alcohol drinking                         |   |                      |                      |                       |  |       | 0.04 |
| Never                                    | 1 | 1.00(0.69,1.44) 0.99 | 1.26(0.83,1.91) 0.28 | 0.59(0.32,1.11) 0.10  |  | 0.41  |      |
| Low to moderate                          | 1 | 1.57(0.93,2.65) 0.09 | 1.55(0.89,2.68) 0.12 | 2.07(1.13,3.81) 0.02  |  | 0.03  |      |
| Heavy                                    | 1 | 0.69(0.34,1.41) 0.31 | 0.96(0.48,1.90) 0.91 | 0.94(0.43,2.09) 0.89  |  | 0.89  |      |



|                                          |   |                      |                      |                      |       |
|------------------------------------------|---|----------------------|----------------------|----------------------|-------|
| Less than high school                    | 1 | 1.00(0.57,1.76) 0.99 | 0.85(0.51,1.43) 0.55 | 0.75(0.43,1.33) 0.33 | 0.27  |
| High school or equivalent                | 1 | 0.53(0.29,0.98) 0.04 | 0.99(0.54,1.84) 0.98 | 0.96(0.50,1.86) 0.91 | 0.60  |
| College or above                         | 1 | 0.83(0.51,1.35) 0.46 | 0.63(0.38,1.05) 0.08 | 0.81(0.46,1.45) 0.48 | 0.38  |
| Family income-poverty ratio              |   |                      |                      |                      | 0.63  |
| <1.0                                     | 1 | 0.67(0.35,1.29) 0.23 | 0.53(0.25,1.11) 0.09 | 0.64(0.29,1.44) 0.28 | 0.20  |
| 1.0-3.0                                  | 1 | 0.64(0.40,1.03) 0.07 | 0.68(0.39,1.20) 0.18 | 0.73(0.43,1.26) 0.26 | 0.32  |
| >3.0                                     | 1 | 1.18(0.65,2.16) 0.58 | 1.22(0.66,2.25) 0.53 | 1.37(0.75,2.50) 0.31 | 0.34  |
| Smoking status                           |   |                      |                      |                      | 0.44  |
| Never                                    | 1 | 0.85(0.50,1.46) 0.56 | 0.75(0.38,1.48) 0.40 | 1.02(0.52,1.99) 0.96 | 0.95  |
| Former                                   | 1 | 0.87(0.53,1.43) 0.58 | 0.73(0.44,1.22) 0.23 | 0.82(0.47,1.43) 0.48 | 0.42  |
| Current                                  | 1 | 0.55(0.26,1.17) 0.12 | 1.03(0.53,1.98) 0.94 | 0.91(0.40,2.06) 0.82 | 0.88  |
| Alcohol drinking                         |   |                      |                      |                      | 0.88  |
| Never                                    | 1 | 1.05(0.63,1.76) 0.85 | 0.90(0.44,1.85) 0.78 | 1.30(0.66,2.58) 0.44 | 0.61  |
| Low to moderate                          | 1 | 0.62(0.37,1.02) 0.06 | 0.65(0.42,1.01) 0.05 | 0.60(0.32,1.13) 0.11 | 0.14  |
| Heavy                                    | 1 | 0.93(0.42,2.04) 0.85 | 1.01(0.52,1.98) 0.97 | 1.17(0.60,2.28) 0.65 | 0.57  |
| Healthy eating index score               |   |                      |                      |                      | 0.44  |
| Quarter 1                                | 1 | 0.79(0.41,1.53) 0.48 | 1.00(0.56,1.78) 0.99 | 0.73(0.34,1.58) 0.43 | 0.55  |
| Quarter 2                                | 1 | 1.16(0.63,2.15) 0.63 | 0.62(0.31,1.24) 0.18 | 1.05(0.51,2.17) 0.88 | 0.79  |
| Quarter 3                                | 1 | 0.65(0.36,1.20) 0.17 | 0.83(0.40,1.69) 0.60 | 0.69(0.35,1.33) 0.26 | 0.47  |
| Quarter 4                                | 1 | 0.65(0.36,1.20) 0.17 | 0.78(0.41,1.50) 0.46 | 0.98(0.51,1.88) 0.96 | 0.81  |
| Total energy intake from diet, kcal      |   |                      |                      |                      | 0.76  |
| [0,1445.5]                               | 1 | 0.94(0.59,1.50) 0.80 | 0.86(0.48,1.56) 0.63 | 1.23(0.58,2.62) 0.59 | 0.96  |
| (1445.5,1908]                            | 1 | 0.69(0.37,1.28) 0.24 | 0.62(0.31,1.22) 0.16 | 0.56(0.30,1.06) 0.08 | 0.08  |
| (1908,2494.5]                            | 1 | 0.76(0.37,1.54) 0.44 | 0.74(0.38,1.45) 0.39 | 0.91(0.43,1.91) 0.80 | 0.96  |
| (2494.5,15594]                           | 1 | 0.65(0.19,2.24) 0.50 | 1.13(0.41,3.14) 0.81 | 1.00(0.39,2.55) 1.00 | 0.68  |
| Self reported health                     |   |                      |                      |                      | 0.7   |
| Very good to excellent                   | 1 | 0.77(0.45,1.34) 0.36 | 0.76(0.42,1.36) 0.35 | 0.79(0.40,1.58) 0.51 | 0.51  |
| Good                                     | 1 | 0.98(0.53,1.80) 0.94 | 1.02(0.55,1.89) 0.94 | 0.78(0.41,1.50) 0.46 | 0.53  |
| Poor to fair                             | 1 | 0.72(0.41,1.26) 0.25 | 0.71(0.39,1.27) 0.25 | 0.96(0.52,1.78) 0.89 | 0.97  |
| Family history of cardiovascular disease |   |                      |                      |                      | 0.51  |
| No                                       | 1 | 0.85(0.58,1.24) 0.39 | 0.83(0.54,1.26) 0.38 | 0.83(0.53,1.30) 0.42 | 0.44  |
| Yes                                      | 1 | 0.63(0.35,1.13) 0.12 | 0.80(0.40,1.57) 0.51 | 1.03(0.50,2.15) 0.93 | 0.76  |
| Cardiovascular disease                   |   |                      |                      |                      | 0.73  |
| No                                       | 1 | 0.74(0.51,1.06) 0.10 | 0.84(0.59,1.19) 0.32 | 0.83(0.56,1.25) 0.37 | 0.55  |
| Yes                                      | 1 | 0.91(0.43,1.93) 0.80 | 0.68(0.32,1.47) 0.33 | 1.04(0.46,2.36) 0.92 | 0.85  |
| Chronic obstructive pulmonary diseases   |   |                      |                      |                      | 0.68  |
| No                                       | 1 | 0.83(0.59,1.17) 0.29 | 0.88(0.63,1.23) 0.47 | 0.96(0.66,1.42) 0.86 | 0.97  |
| Yes                                      | 1 | 0.36(0.09,1.37) 0.13 | 0.23(0.08,0.68) 0.01 | 0.27(0.11,0.71) 0.01 | 0.01  |
| History of chronic kidney disease        |   |                      |                      |                      | 0.49  |
| No                                       | 1 | 0.77(0.56,1.08) 0.13 | 0.83(0.59,1.15) 0.26 | 0.91(0.62,1.34) 0.64 | 0.77  |
| Yes                                      | 1 | 1.51(0.42,5.39) 0.53 | 0.45(0.09,2.42) 0.35 | 0.09(0.01,0.74) 0.03 | 0.004 |
| Cancer                                   |   |                      |                      |                      | 0.82  |
| No                                       | 1 | 0.69(0.49,0.97) 0.03 | 0.74(0.51,1.07) 0.11 | 0.82(0.53,1.28) 0.39 | 0.45  |
| Yes                                      | 1 | 1.12(0.66,1.91) 0.66 | 1.08(0.58,2.04) 0.80 | 1.20(0.63,2.27) 0.58 | 0.65  |
| <b>Other mortality</b>                   |   |                      |                      |                      |       |
| Sex                                      |   |                      |                      |                      | 0.54  |
| Male                                     | 1 | 1.29(0.87,1.90) 0.20 | 1.27(0.84,1.92) 0.25 | 1.16(0.72,1.88) 0.55 | 0.75  |



|                                          |   |                      |                      |                      |      |
|------------------------------------------|---|----------------------|----------------------|----------------------|------|
| Female                                   | 1 | 1.13(0.81,1.56) 0.47 | 1.39(1.02,1.89) 0.04 | 1.15(0.78,1.71) 0.47 | 0.14 |
| Age, years                               |   |                      |                      |                      | 0.67 |
| <60                                      | 1 | 1.40(0.77,2.57) 0.27 | 1.56(0.91,2.67) 0.11 | 1.06(0.54,2.07) 0.87 | 0.87 |
| ≥60                                      | 1 | 1.10(0.88,1.37) 0.41 | 1.16(0.90,1.50) 0.26 | 1.12(0.80,1.56) 0.51 | 0.44 |
| BMI, kg/m <sup>2</sup>                   |   |                      |                      |                      | 0.56 |
| Normal weight (<25)                      | 1 | 1.15(0.80,1.65) 0.45 | 1.54(1.00,2.39) 0.05 | 1.20(0.78,1.84) 0.40 | 0.18 |
| Overweight (25-30)                       | 1 | 1.43(0.99,2.07) 0.05 | 1.53(1.02,2.30) 0.04 | 1.34(0.77,2.32) 0.30 | 0.33 |
| Obesity (≥30)                            | 1 | 0.98(0.67,1.41) 0.90 | 0.91(0.60,1.38) 0.66 | 0.91(0.54,1.53) 0.72 | 0.66 |
| Race                                     |   |                      |                      |                      | 0.97 |
| Non-Hispanic White                       | 1 | 1.15(0.89,1.50) 0.29 | 1.32(1.01,1.72) 0.04 | 1.18(0.81,1.72) 0.38 | 0.26 |
| Non-Hispanic Black                       | 1 | 1.29(0.73,2.29) 0.38 | 1.27(0.58,2.81) 0.55 | 1.20(0.57,2.56) 0.63 | 0.62 |
| Mexican American                         | 1 | 0.98(0.51,1.88) 0.95 | 0.69(0.34,1.37) 0.29 | 0.50(0.18,1.39) 0.18 | 0.10 |
| Others                                   | 1 | 0.79(0.34,1.81) 0.57 | 0.76(0.35,1.64) 0.48 | 0.62(0.24,1.61) 0.33 | 0.33 |
| Education level                          |   |                      |                      |                      | 0.83 |
| Less than high school                    | 1 | 1.19(0.79,1.80) 0.41 | 1.11(0.71,1.73) 0.64 | 0.85(0.51,1.40) 0.52 | 0.59 |
| High school or equivalent                | 1 | 1.21(0.82,1.80) 0.34 | 1.18(0.79,1.76) 0.41 | 1.01(0.61,1.65) 0.98 | 0.87 |
| College or above                         | 1 | 1.14(0.79,1.64) 0.48 | 1.37(0.94,2.00) 0.10 | 1.33(0.82,2.18) 0.25 | 0.20 |
| Family income-poverty ratio              |   |                      |                      |                      | 0.78 |
| <1.0                                     | 1 | 1.29(0.73,2.29) 0.38 | 1.15(0.71,1.86) 0.57 | 1.42(0.86,2.32) 0.17 | 0.22 |
| 1.0-3.0                                  | 1 | 0.99(0.72,1.36) 0.95 | 1.03(0.74,1.43) 0.87 | 0.81(0.51,1.27) 0.35 | 0.42 |
| >3.0                                     | 1 | 1.62(0.99,2.66) 0.06 | 2.07(1.18,3.61) 0.01 | 1.85(0.97,3.54) 0.06 | 0.06 |
| <b>Smoking status</b>                    |   |                      |                      |                      | 0.27 |
| Never                                    | 1 | 1.10(0.74,1.64) 0.64 | 1.11(0.74,1.66) 0.61 | 0.96(0.60,1.55) 0.88 | 0.95 |
| Former                                   | 1 | 1.17(0.86,1.60) 0.31 | 1.19(0.83,1.69) 0.35 | 1.13(0.77,1.66) 0.53 | 0.56 |
| Current                                  | 1 | 1.12(0.74,1.68) 0.60 | 1.56(0.96,2.54) 0.08 | 1.22(0.57,2.64) 0.61 | 0.41 |
| Alcohol drinking                         |   |                      |                      |                      | 0.78 |
| Never                                    | 1 | 1.23(0.84,1.79) 0.28 | 1.34(0.93,1.93) 0.11 | 1.12(0.71,1.76) 0.62 | 0.44 |
| Low to moderate                          | 1 | 1.01(0.74,1.38) 0.95 | 1.15(0.84,1.58) 0.38 | 1.24(0.80,1.95) 0.34 | 0.27 |
| Heavy                                    | 1 | 1.38(0.74,2.55) 0.31 | 1.27(0.70,2.32) 0.43 | 0.85(0.45,1.61) 0.62 | 0.48 |
| Healthy eating index score               |   |                      |                      |                      | 0.48 |
| Quarter 1                                | 1 | 1.18(0.71,1.96) 0.51 | 1.40(0.78,2.51) 0.26 | 1.11(0.61,2.01) 0.73 | 0.49 |
| Quarter 2                                | 1 | 1.29(0.89,1.88) 0.18 | 1.11(0.73,1.67) 0.62 | 0.74(0.41,1.34) 0.32 | 0.33 |
| Quarter 3                                | 1 | 1.24(0.77,1.99) 0.37 | 1.08(0.71,1.65) 0.71 | 1.25(0.63,2.50) 0.53 | 0.66 |
| Quarter 4                                | 1 | 1.06(0.67,1.67) 0.81 | 1.66(0.98,2.81) 0.06 | 1.46(0.83,2.57) 0.18 | 0.10 |
| Total energy intake from diet, kcal      |   |                      |                      |                      | 0.65 |
| [0,1445.5]                               | 1 | 1.05(0.76,1.45) 0.77 | 1.41(0.97,2.04) 0.07 | 0.79(0.44,1.42) 0.44 | 0.48 |
| (1445.5,1908]                            | 1 | 1.39(0.91,2.13) 0.13 | 1.49(1.00,2.22) 0.05 | 1.15(0.55,2.37) 0.71 | 0.42 |
| (1908,2494.5]                            | 1 | 1.06(0.62,1.84) 0.83 | 1.36(0.77,2.39) 0.29 | 1.33(0.75,2.35) 0.33 | 0.25 |
| (2494.5,15594]                           | 1 | 1.34(0.42,4.27) 0.62 | 0.98(0.32,3.00) 0.97 | 1.01(0.34,2.97) 0.98 | 0.66 |
| Self reported health                     |   |                      |                      |                      | 0.29 |
| Very good to excellent                   | 1 | 1.22(0.86,1.71) 0.26 | 1.58(1.09,2.29) 0.02 | 1.15(0.68,1.95) 0.61 | 0.30 |
| Good                                     | 1 | 1.24(0.80,1.91) 0.33 | 1.16(0.79,1.70) 0.46 | 1.25(0.73,2.11) 0.42 | 0.49 |
| Poor to fair                             | 1 | 0.98(0.64,1.51) 0.92 | 1.04(0.64,1.68) 0.89 | 0.99(0.58,1.71) 0.98 | 0.96 |
| Family history of cardiovascular disease |   |                      |                      |                      | 0.61 |
| No                                       | 1 | 1.15(0.89,1.48) 0.27 | 1.21(0.92,1.60) 0.17 | 1.18(0.79,1.76) 0.42 | 0.37 |
| Yes                                      | 1 | 1.22(0.75,1.99) 0.43 | 1.44(0.90,2.31) 0.13 | 0.99(0.65,1.51) 0.95 | 0.77 |
| Cardiovascular disease                   |   |                      |                      |                      | 0.86 |

|                                        |   |                       |                      |                      |      |
|----------------------------------------|---|-----------------------|----------------------|----------------------|------|
| No                                     | 1 | 1.10(0.82,1.48) 0.52  | 1.18(0.87,1.59) 0.28 | 1.02(0.70,1.48) 0.94 | 0.84 |
| Yes                                    | 1 | 1.26(0.83,1.89) 0.27  | 1.47(0.94,2.30) 0.09 | 1.34(0.77,2.34) 0.30 | 0.15 |
| Chronic obstructive pulmonary diseases |   |                       |                      |                      | 0.14 |
| No                                     | 1 | 1.14(0.89,1.45) 0.31  | 1.20(0.93,1.55) 0.16 | 1.04(0.73,1.48) 0.83 | 0.69 |
| Yes                                    | 1 | 1.25(0.65,2.39) 0.50  | 1.56(0.86,2.81) 0.14 | 1.91(0.88,4.17) 0.10 | 0.06 |
| History of chronic kidney disease      |   |                       |                      |                      | 0.36 |
| No                                     | 1 | 1.18(0.93,1.49) 0.18  | 1.26(0.98,1.62) 0.08 | 1.15(0.83,1.61) 0.40 | 0.33 |
| Yes                                    | 1 | 2.21(0.46,10.48) 0.32 | 2.52(0.68,9.34) 0.17 | 0.50(0.07,3.73) 0.50 | 0.65 |
| Cancer                                 |   |                       |                      |                      | 0.41 |
| No                                     | 1 | 1.21(0.92,1.58) 0.17  | 1.21(0.90,1.62) 0.21 | 1.17(0.78,1.77) 0.44 | 0.42 |
| Yes                                    | 1 | 1.16(0.68,1.98) 0.58  | 1.84(1.04,3.27) 0.04 | 1.24(0.69,2.21) 0.47 | 0.20 |

Adjusted for sex, age, race, BMI, educational level, smoking status, drinking status, family income poverty ratio, healthy eating index-2015, total energy intake from the diet, self-reported health status, family history of cardiovascular diseases, self-reported cardiovascular disease, self-reported chronic obstructive pulmonary disease, self-reported chronic kidney disease, and self-reported cancer.

**Supplementary Table 2.3** Subgroup analysis of hazard ratios for vitamin B2 levels with all-cause and CVD mortality in participants with prediabetes from NHANES 1999-2018

|                                          | Q1 | Q2                   | Q3                   | Q4                   | <i>P</i> <sub>trend</sub> | <i>P</i> <sub>interaction</sub> |
|------------------------------------------|----|----------------------|----------------------|----------------------|---------------------------|---------------------------------|
| <b>All-cause mortality</b>               |    |                      |                      |                      |                           |                                 |
| Sex                                      |    |                      |                      |                      |                           | 0.63                            |
| Male                                     | 1  | 1.15(0.89,1.49) 0.29 | 1.01(0.79,1.30) 0.92 | 1.12(0.82,1.53) 0.46 | 0.69                      |                                 |
| Female                                   | 1  | 0.96(0.78,1.18) 0.68 | 0.92(0.74,1.14) 0.44 | 0.97(0.73,1.29) 0.84 | 0.70                      |                                 |
| Age, years                               |    |                      |                      |                      |                           | 0.13                            |
| <60                                      | 1  | 0.99(0.65,1.50) 0.95 | 1.02(0.68,1.53) 0.93 | 1.45(0.95,2.20) 0.09 | 0.08                      |                                 |
| ≥60                                      | 1  | 1.03(0.86,1.23) 0.79 | 0.91(0.77,1.07) 0.24 | 0.87(0.70,1.09) 0.23 | 0.10                      |                                 |
| BMI, kg/m <sup>2</sup>                   |    |                      |                      |                      |                           | 0.66                            |
| Normal weight (<25)                      | 1  | 0.92(0.71,1.21) 0.56 | 0.85(0.65,1.12) 0.25 | 0.93(0.72,1.20) 0.56 | 0.50                      |                                 |
| Overweight (25-30)                       | 1  | 1.17(0.87,1.56) 0.30 | 1.03(0.77,1.38) 0.85 | 1.27(0.87,1.85) 0.21 | 0.32                      |                                 |
| Obesity (≥30)                            | 1  | 0.98(0.74,1.31) 0.89 | 0.91(0.69,1.20) 0.51 | 0.85(0.59,1.24) 0.41 | 0.36                      |                                 |
| Race                                     |    |                      |                      |                      |                           | 0.21                            |
| Non-Hispanic White                       | 1  | 0.96(0.79,1.17) 0.69 | 0.89(0.75,1.05) 0.15 | 0.97(0.77,1.23) 0.82 | 0.76                      |                                 |
| Non-Hispanic Black                       | 1  | 1.39(1.00,1.91) 0.05 | 0.85(0.58,1.25) 0.40 | 1.12(0.69,1.81) 0.65 | 0.93                      |                                 |
| Mexican American                         | 1  | 0.82(0.48,1.40) 0.47 | 1.35(0.70,2.59) 0.37 | 0.84(0.41,1.71) 0.63 | 0.94                      |                                 |
| Others                                   | 1  | 1.01(0.57,1.77) 0.99 | 1.24(0.72,2.11) 0.44 | 1.17(0.57,2.41) 0.66 | 0.49                      |                                 |
| Education level                          |    |                      |                      |                      |                           | 0.91                            |
| Less than high school                    | 1  | 1.04(0.79,1.36) 0.80 | 0.94(0.71,1.25) 0.68 | 0.93(0.70,1.25) 0.64 | 0.53                      |                                 |
| High school or equivalent                | 1  | 0.95(0.69,1.31) 0.77 | 0.91(0.66,1.26) 0.58 | 1.02(0.65,1.58) 0.94 | 0.97                      |                                 |
| College or above                         | 1  | 1.04(0.79,1.37) 0.78 | 0.92(0.70,1.20) 0.53 | 1.05(0.75,1.46) 0.79 | 0.97                      |                                 |
| Family income-poverty ratio              |    |                      |                      |                      |                           | 0.58                            |
| <1.0                                     | 1  | 1.03(0.69,1.53) 0.90 | 0.87(0.60,1.24) 0.44 | 1.19(0.83,1.70) 0.34 | 0.58                      |                                 |
| 1.0-3.0                                  | 1  | 1.03(0.85,1.25) 0.77 | 0.92(0.76,1.11) 0.37 | 0.82(0.62,1.09) 0.17 | 0.10                      |                                 |
| >3.0                                     | 1  | 1.07(0.74,1.53) 0.72 | 1.03(0.70,1.51) 0.88 | 1.33(0.90,1.96) 0.15 | 0.14                      |                                 |
| Smoking status                           |    |                      |                      |                      |                           | 0.01                            |
| Never                                    | 1  | 1.18(0.91,1.53) 0.22 | 1.02(0.81,1.29) 0.86 | 1.02(0.75,1.39) 0.90 | 0.81                      |                                 |
| Former                                   | 1  | 0.95(0.71,1.28) 0.73 | 0.89(0.69,1.15) 0.38 | 0.86(0.62,1.19) 0.37 | 0.33                      |                                 |
| Current                                  | 1  | 0.91(0.64,1.29) 0.61 | 0.85(0.58,1.24) 0.40 | 1.23(0.79,1.93) 0.35 | 0.34                      |                                 |
| Alcohol drinking                         |    |                      |                      |                      |                           | 0.47                            |
| Never                                    | 1  | 1.00(0.78,1.29) 1.00 | 1.01(0.79,1.30) 0.92 | 0.86(0.62,1.20) 0.37 | 0.43                      |                                 |
| Low to moderate                          | 1  | 1.03(0.79,1.33) 0.83 | 0.91(0.71,1.17) 0.48 | 1.13(0.81,1.57) 0.47 | 0.60                      |                                 |
| Heavy                                    | 1  | 1.19(0.76,1.86) 0.44 | 0.98(0.67,1.42) 0.92 | 1.19(0.78,1.81) 0.42 | 0.61                      |                                 |
| Healthy eating index score               |    |                      |                      |                      |                           | 0.39                            |
| Quarter 1                                | 1  | 1.11(0.80,1.55) 0.53 | 0.80(0.57,1.13) 0.20 | 0.83(0.56,1.23) 0.35 | 0.15                      |                                 |
| Quarter 2                                | 1  | 1.02(0.76,1.38) 0.88 | 0.97(0.69,1.34) 0.83 | 1.06(0.71,1.60) 0.77 | 0.85                      |                                 |
| Quarter 3                                | 1  | 1.21(0.84,1.75) 0.31 | 1.10(0.83,1.46) 0.51 | 1.39(0.90,2.16) 0.14 | 0.21                      |                                 |
| Quarter 4                                | 1  | 0.76(0.54,1.07) 0.11 | 0.86(0.62,1.18) 0.35 | 0.75(0.51,1.11) 0.15 | 0.31                      |                                 |
| Total energy intake from diet, kcal      |    |                      |                      |                      |                           | 0.22                            |
| [0,1445.5]                               | 1  | 1.06(0.86,1.30) 0.57 | 0.78(0.60,1.03) 0.08 | 1.38(1.02,1.86) 0.04 | 0.72                      |                                 |
| (1445.5,1908]                            | 1  | 0.88(0.64,1.21) 0.42 | 0.82(0.59,1.12) 0.21 | 0.87(0.58,1.31) 0.50 | 0.41                      |                                 |
| (1908,2494.5]                            | 1  | 1.01(0.66,1.56) 0.96 | 1.16(0.74,1.80) 0.52 | 1.17(0.76,1.81) 0.47 | 0.34                      |                                 |
| (2494.5,15594]                           | 1  | 1.29(0.69,2.43) 0.43 | 1.09(0.62,1.90) 0.77 | 1.00(0.57,1.75) 0.99 | 0.43                      |                                 |
| Self reported health                     |    |                      |                      |                      |                           | 0.17                            |
| Very good to excellent                   | 1  | 1.09(0.85,1.40) 0.48 | 1.00(0.76,1.31) 1.00 | 1.03(0.74,1.41) 0.87 | 0.96                      |                                 |
| Good                                     | 1  | 1.06(0.80,1.41) 0.66 | 0.77(0.56,1.06) 0.10 | 1.03(0.75,1.43) 0.84 | 0.75                      |                                 |
| Poor to fair                             | 1  | 0.89(0.64,1.25) 0.51 | 1.01(0.72,1.42) 0.94 | 0.95(0.65,1.39) 0.81 | 0.96                      |                                 |
| Family history of cardiovascular disease |    |                      |                      |                      |                           | 0.64                            |
| No                                       | 1  | 1.09(0.91,1.31) 0.37 | 0.97(0.82,1.14) 0.72 | 1.14(0.90,1.44) 0.28 | 0.48                      |                                 |
| Yes                                      | 1  | 0.80(0.53,1.21) 0.29 | 0.83(0.59,1.18) 0.29 | 0.76(0.51,1.13) 0.18 | 0.25                      |                                 |
| Cardiovascular disease                   |    |                      |                      |                      |                           | 0.85                            |
| No                                       | 1  | 1.00(0.82,1.23) 0.99 | 0.92(0.76,1.10) 0.36 | 1.01(0.80,1.28) 0.92 | 0.96                      |                                 |
| Yes                                      | 1  | 1.12(0.85,1.47) 0.43 | 1.03(0.80,1.32) 0.81 | 1.06(0.77,1.45) 0.72 | 0.91                      |                                 |
| Chronic obstructive pulmonary            |    |                      |                      |                      |                           | 0.56                            |

|                                     |   |                 |      |                 |      |                  |      |      |
|-------------------------------------|---|-----------------|------|-----------------|------|------------------|------|------|
| diseases                            |   |                 |      |                 |      |                  |      |      |
| No                                  | 1 | 1.01(0.85,1.19) | 0.94 | 0.93(0.79,1.09) | 0.36 | 1.00(0.81,1.24)  | 1.00 | 0.84 |
| Yes                                 | 1 | 1.00(0.64,1.55) | 0.99 | 0.83(0.48,1.43) | 0.50 | 0.95(0.57,1.57)  | 0.83 | 0.69 |
| History of chronic kidney disease   |   |                 |      |                 |      |                  |      | 0.74 |
| No                                  | 1 | 1.06(0.90,1.24) | 0.51 | 0.95(0.82,1.12) | 0.57 | 1.04(0.84,1.28)  | 0.74 | 1    |
| Yes                                 | 1 | 0.75(0.38,1.48) | 0.42 | 0.62(0.27,1.42) | 0.26 | 0.87(0.39,1.91)  | 0.72 | 0.58 |
| Cancer                              |   |                 |      |                 |      |                  |      | 0.28 |
| No                                  | 1 | 0.97(0.81,1.16) | 0.70 | 0.97(0.81,1.16) | 0.74 | 1.04(0.82,1.30)  | 0.76 | 0.72 |
| Yes                                 | 1 | 1.30(0.95,1.78) | 0.10 | 0.91(0.69,1.22) | 0.53 | 1.03(0.72,1.48)  | 0.86 | 0.52 |
| <b>CVD mortality</b>                |   |                 |      |                 |      |                  |      |      |
| Sex                                 |   |                 |      |                 |      |                  |      | 0.06 |
| Male                                | 1 | 1.17(0.76,1.81) | 0.48 | 1.24(0.79,1.96) | 0.35 | 1.74(1.04,2.92)  | 0.03 | 0.02 |
| Female                              | 1 | 1.18(0.78,1.78) | 0.43 | 1.13(0.76,1.69) | 0.54 | 0.83(0.45,1.54)  | 0.56 | 0.68 |
| Age, years                          |   |                 |      |                 |      |                  |      | 0.61 |
| <60                                 | 1 | 1.38(0.58,3.31) | 0.46 | 1.26(0.55,2.91) | 0.59 | 2.50(0.95,6.57)  | 0.06 | 0.09 |
| ≥60                                 | 1 | 1.08(0.81,1.43) | 0.60 | 1.10(0.84,1.45) | 0.49 | 1.14(0.80,1.62)  | 0.48 | 0.49 |
| BMI, kg/m <sup>2</sup>              |   |                 |      |                 |      |                  |      | 0.91 |
| Normal weight (<25)                 | 1 | 1.06(0.65,1.72) | 0.81 | 1.07(0.67,1.71) | 0.77 | 1.35(0.83,2.18)  | 0.23 | 0.23 |
| Overweight (25-30)                  | 1 | 1.07(0.63,1.80) | 0.81 | 1.24(0.75,2.06) | 0.41 | 1.64(0.93,2.91)  | 0.09 | 0.05 |
| Obesity (≥30)                       | 1 | 1.22(0.76,1.96) | 0.42 | 1.27(0.77,2.08) | 0.35 | 1.24(0.62,2.47)  | 0.55 | 0.58 |
| Race                                |   |                 |      |                 |      |                  |      | 0.55 |
| Non-Hispanic White                  | 1 | 1.10(0.79,1.55) | 0.57 | 1.15(0.82,1.60) | 0.42 | 1.30(0.85,1.99)  | 0.23 | 0.23 |
| Non-Hispanic Black                  | 1 | 1.12(0.64,1.98) | 0.69 | 0.73(0.32,1.67) | 0.46 | 1.19(0.48,3.00)  | 0.71 | 0.98 |
| Mexican American                    | 1 | 1.12(0.49,2.55) | 0.80 | 3.16(1.29,7.77) | 0.01 | 1.84(0.59,5.75)  |      | 0.03 |
| Others                              | 1 | 2.49(1.17,5.29) | 0.02 | 1.31(0.34,5.12) | 0.69 | 2.92(0.38,22.28) |      | 0.42 |
| Education level                     |   |                 |      |                 |      |                  |      | 0.09 |
| Less than high school               | 1 | 1.08(0.72,1.60) | 0.71 | 0.97(0.59,1.61) | 0.92 | 1.14(0.68,1.92)  | 0.61 | 0.70 |
| High school or equivalent           | 1 | 0.69(0.40,1.19) | 0.18 | 1.17(0.65,2.09) | 0.60 | 1.89(0.95,3.77)  | 0.07 | 0.03 |
| College or above                    | 1 | 1.47(0.93,2.33) | 0.10 | 1.18(0.72,1.93) | 0.51 | 1.18(0.67,2.08)  | 0.57 | 0.97 |
| Family income-poverty ratio         |   |                 |      |                 |      |                  |      | 0.27 |
| <1.0                                | 1 | 1.31(0.74,2.31) | 0.35 | 1.05(0.54,2.04) | 0.89 | 1.56(0.71,3.42)  | 0.27 | 0.38 |
| 1.0-3.0                             | 1 | 0.97(0.68,1.38) | 0.84 | 1.11(0.80,1.54) | 0.53 | 0.89(0.58,1.36)  | 0.58 | 0.77 |
| >3.0                                | 1 | 1.53(0.82,2.88) | 0.18 | 1.37(0.73,2.58) | 0.33 | 2.35(1.06,5.21)  | 0.04 | 0.07 |
| Smoking status                      |   |                 |      |                 |      |                  |      | 0.58 |
| Never                               | 1 | 1.16(0.79,1.70) | 0.44 | 1.15(0.79,1.68) | 0.45 | 1.12(0.65,1.93)  | 0.68 | 0.70 |
| Former                              | 1 | 0.98(0.59,1.63) | 0.95 | 0.91(0.53,1.56) | 0.74 | 1.35(0.77,2.36)  | 0.29 | 0.21 |
| Current                             | 1 | 1.33(0.62,2.87) | 0.47 | 1.76(0.86,3.58) | 0.12 | 1.72(0.79,3.78)  | 0.17 | 0.12 |
| Alcohol drinking                    |   |                 |      |                 |      |                  |      | 0.10 |
| Never                               | 1 | 0.86(0.58,1.29) | 0.47 | 1.15(0.77,1.72) | 0.48 | 0.88(0.51,1.53)  | 0.65 | 0.97 |
| Low to moderate                     | 1 | 1.51(0.93,2.47) | 0.10 | 1.13(0.69,1.85) | 0.63 | 1.77(0.96,3.26)  | 0.07 | 0.20 |
| Heavy                               | 1 | 1.25(0.58,2.68) | 0.57 | 1.74(0.88,3.43) | 0.11 | 2.17(0.91,5.16)  | 0.08 | 0.04 |
| Healthy eating index score          |   |                 |      |                 |      |                  |      | 0.13 |
| Quarter 1                           | 1 | 1.05(0.56,1.98) | 0.88 | 1.04(0.56,1.96) | 0.90 | 0.70(0.31,1.57)  | 0.39 | 0.53 |
| Quarter 2                           | 1 | 1.68(0.86,3.30) | 0.13 | 1.51(0.73,3.15) | 0.27 | 2.67(1.23,5.80)  | 0.01 | 0.02 |
| Quarter 3                           | 1 | 0.93(0.53,1.64) | 0.80 | 1.17(0.73,1.88) | 0.52 | 1.57(0.74,3.35)  | 0.24 | 0.18 |
| Quarter 4                           | 1 | 1.03(0.59,1.81) | 0.91 | 0.93(0.53,1.63) | 0.81 | 0.83(0.44,1.59)  | 0.58 | 0.47 |
| Total energy intake from diet, kcal |   |                 |      |                 |      |                  |      | 0.40 |
| [0,1445.5]                          | 1 | 1.03(0.71,1.50) | 0.88 | 0.73(0.43,1.25) | 0.26 | 1.71(1.02,2.84)  | 0.04 | 0.49 |
| (1445.5,1908]                       | 1 | 0.88(0.55,1.41) | 0.59 | 1.18(0.73,1.89) | 0.50 | 1.01(0.56,1.82)  | 0.98 | 0.48 |
| (1908,2494.5]                       | 1 | 1.91(0.72,5.01) | 0.19 | 1.98(0.79,4.93) | 0.14 | 2.22(0.87,5.69)  | 0.10 | 0.28 |
| (2494.5,15594]                      | 1 | 0.99(0.24,4.09) | 0.99 | 0.73(0.25,2.19) | 0.58 | 0.96(0.31,2.93)  | 0.94 | 0.81 |
| Self reported health                |   |                 |      |                 |      |                  |      | 0.80 |
| Very good to excellent              | 1 | 0.91(0.56,1.46) | 0.68 | 0.98(0.62,1.55) | 0.93 | 1.09(0.57,2.09)  | 0.80 | 0.73 |
| Good                                | 1 | 1.17(0.76,1.80) | 0.48 | 0.95(0.59,1.52) | 0.82 | 1.12(0.63,1.99)  | 0.70 | 0.90 |
| Poor to fair                        | 1 | 1.32(0.73,2.37) | 0.35 | 1.83(1.00,3.35) | 0.05 | 2.25(1.21,4.20)  | 0.01 | 0.01 |



|                                                 |   |                      |                      |                      |              |
|-------------------------------------------------|---|----------------------|----------------------|----------------------|--------------|
| [0,1445.5]                                      | 1 | 1.04(0.65,1.66) 0.86 | 0.53(0.27,1.02) 0.06 | 0.73(0.30,1.75) 0.48 | 0.14         |
| (1445.5,1908]                                   | 1 | 0.59(0.30,1.17) 0.13 | 0.42(0.20,0.85) 0.02 | 0.59(0.28,1.23) 0.16 | 0.12         |
| (1908,2494.5]                                   | 1 | 0.73(0.35,1.52) 0.40 | 0.69(0.32,1.47) 0.34 | 0.67(0.31,1.45) 0.31 | 0.44         |
| (2494.5,15594]                                  | 1 | 0.98(0.30,3.17) 0.97 | 1.61(0.53,4.92) 0.40 | 1.69(0.61,4.70) 0.31 | 0.22         |
| <b>Self reported health</b>                     |   |                      |                      |                      | <b>0.61</b>  |
| Very good to excellent                          | 1 | 0.90(0.51,1.58) 0.71 | 0.42(0.21,0.83) 0.01 | 0.63(0.34,1.17) 0.14 | 0.05         |
| Good                                            | 1 | 0.76(0.45,1.27) 0.29 | 0.47(0.24,0.89) 0.02 | 0.59(0.31,1.14) 0.12 | 0.10         |
| Poor to fair                                    | 1 | 0.73(0.36,1.48) 0.38 | 0.87(0.45,1.66) 0.67 | 0.94(0.46,1.91) 0.87 | 0.84         |
| <b>Family history of cardiovascular disease</b> |   |                      |                      |                      | <b>0.97</b>  |
| No                                              | 1 | 0.81(0.54,1.20) 0.29 | 0.64(0.46,0.89) 0.01 | 0.77(0.54,1.11) 0.17 | 0.15         |
| Yes                                             | 1 | 0.66(0.31,1.42) 0.29 | 0.48(0.21,1.09) 0.08 | 0.66(0.31,1.42) 0.29 | 0.31         |
| <b>Cardiovascular disease</b>                   |   |                      |                      |                      | <b>0.37</b>  |
| No                                              | 1 | 0.76(0.51,1.15) 0.20 | 0.62(0.42,0.92) 0.02 | 0.83(0.56,1.22) 0.34 | 0.41         |
| Yes                                             | 1 | 0.83(0.44,1.57) 0.56 | 0.56(0.28,1.13) 0.11 | 0.45(0.20,1.06) 0.07 | 0.04         |
| <b>Chronic obstructive pulmonary diseases</b>   |   |                      |                      |                      | <b>0.66</b>  |
| No                                              | 1 | 0.82(0.57,1.18) 0.30 | 0.64(0.45,0.92) 0.01 | 0.83(0.58,1.20) 0.33 | 0.32         |
| Yes                                             | 1 | 0.30(0.10,0.91) 0.03 | 0.27(0.07,1.08) 0.06 | 0.15(0.05,0.46)      | 0.01         |
|                                                 |   |                      |                      | <0.001               |              |
| <b>History of chronic kidney disease</b>        |   |                      |                      |                      | <b>0.74</b>  |
| No                                              | 1 | 0.77(0.54,1.08) 0.13 | 0.61(0.44,0.86)      | 0.75(0.52,1.07) 0.11 | 0.13         |
|                                                 |   |                      | 0.004                |                      |              |
| Yes                                             | 1 | 1.27(0.33,4.92) 0.73 | 0.19(0.04,0.97) 0.05 | 0.55(0.09,3.31) 0.51 | 0.17         |
| <b>Cancer</b>                                   |   |                      |                      |                      | <b>0.85</b>  |
| No                                              | 1 | 0.69(0.46,1.04) 0.08 | 0.54(0.35,0.84) 0.01 | 0.70(0.46,1.07) 0.10 | 0.14         |
| Yes                                             | 1 | 1.17(0.64,2.14) 0.61 | 0.86(0.46,1.59) 0.63 | 1.01(0.52,1.94)      | 0.76         |
|                                                 |   |                      |                      | 0.98                 |              |
| <b>Other mortality</b>                          |   |                      |                      |                      |              |
| <b>Sex</b>                                      |   |                      |                      |                      | <b>0.09</b>  |
| Male                                            | 1 | 1.34(0.95,1.89) 0.10 | 1.03(0.73,1.46) 0.85 | 0.93(0.60,1.46) 0.76 | 0.31         |
| Female                                          | 1 | 0.99(0.72,1.37) 0.97 | 1.09(0.81,1.45) 0.58 | 1.22(0.82,1.82) 0.33 | 0.28         |
| <b>Age, years</b>                               |   |                      |                      |                      | <b>0.19</b>  |
| <60                                             | 1 | 1.59(0.88,2.86) 0.12 | 1.52(0.85,2.72) 0.16 | 1.76(1.01,3.08) 0.05 | 0.12         |
| ≥60                                             | 1 | 0.99(0.77,1.27) 0.92 | 0.92(0.71,1.18) 0.51 | 0.80(0.55,1.15) 0.23 | 0.19         |
| <b>BMI, kg/m2</b>                               |   |                      |                      |                      | <b>0.53</b>  |
| Normal weight (<25)                             | 1 | 0.95(0.63,1.44) 0.81 | 0.74(0.49,1.11) 0.14 | 0.82(0.54,1.26) 0.36 | 0.22         |
| Overweight (25-30)                              | 1 | 1.36(0.88,2.11) 0.17 | 1.22(0.80,1.86) 0.35 | 1.28(0.72,2.25) 0.40 | 0.63         |
| Obesity (≥30)                                   | 1 | 1.07(0.71,1.62) 0.73 | 1.14(0.77,1.69) 0.50 | 0.89(0.50,1.57) 0.68 | 0.75         |
| <b>Race</b>                                     |   |                      |                      |                      | <b>0.23</b>  |
| Non-Hispanic White                              | 1 | 1.13(0.86,1.50) 0.38 | 1.04(0.81,1.35) 0.76 | 1.03(0.72,1.49) 0.86 | 0.93         |
| Non-Hispanic Black                              | 1 | 1.68(0.99,2.85) 0.06 | 0.87(0.48,1.59) 0.66 | 1.16(0.52,2.59) 0.71 | 0.98         |
| Mexican American                                | 1 | 0.52(0.24,1.13) 0.10 | 1.59(0.61,4.15) 0.35 | 0.64(0.19,2.17) 0.47 | 0.83         |
| Others                                          | 1 | 0.53(0.21,1.29) 0.16 | 0.87(0.44,1.71) 0.69 | 0.75(0.33,1.69) 0.49 | 0.57         |
| <b>Education level</b>                          |   |                      |                      |                      | <b>0.70</b>  |
| Less than high school                           | 1 | 1.08(0.71,1.64) 0.73 | 1.03(0.67,1.58) 0.89 | 0.78(0.46,1.33) 0.37 | 0.41         |
| High school or equivalent                       | 1 | 1.12(0.67,1.86) 0.67 | 1.01(0.62,1.65) 0.96 | 0.80(0.46,1.40) 0.44 | 0.36         |
| College or above                                | 1 | 1.18(0.78,1.77) 0.43 | 1.15(0.79,1.66) 0.47 | 1.32(0.79,2.19) 0.29 | 0.38         |
| <b>Family income-poverty ratio</b>              |   |                      |                      |                      | <b>0.92</b>  |
| <1.0                                            | 1 | 1.11(0.60,2.07) 0.73 | 0.89(0.52,1.54) 0.69 | 1.36(0.82,2.24) 0.24 | 0.41         |
| 1.0-3.0                                         | 1 | 1.04(0.77,1.42) 0.79 | 1.02(0.75,1.39) 0.90 | 0.84(0.55,1.27) 0.41 | 0.40         |
| >3.0                                            | 1 | 1.28(0.76,2.15) 0.35 | 1.13(0.69,1.85) 0.63 | 1.27(0.70,2.31) 0.42 | 0.68         |
| <b>Smoking status</b>                           |   |                      |                      |                      | <b>0.001</b> |
| Never                                           | 1 | 1.28(0.84,1.96) 0.26 | 1.30(0.90,1.89) 0.17 | 1.10(0.68,1.79) 0.70 | 0.63         |
| Former                                          | 1 | 0.87(0.60,1.25) 0.45 | 0.87(0.62,1.21) 0.40 | 0.62(0.39,0.99) 0.05 | 0.05         |
| Current                                         | 1 | 1.42(0.87,2.32) 0.16 | 0.86(0.49,1.51) 0.60 | 1.63(0.89,3.01) 0.12 | 0.33         |
| <b>Alcohol drinking</b>                         |   |                      |                      |                      | <b>0.77</b>  |
| Never                                           | 1 | 1.06(0.71,1.58) 0.79 | 1.15(0.80,1.65) 0.46 | 0.91(0.56,1.47) 0.69 | 0.85         |
| Low to moderate                                 | 1 | 1.16(0.83,1.63) 0.39 | 1.03(0.72,1.46) 0.88 | 1.13(0.70,1.83) 0.61 | 0.81         |

|                                          |   |                      |                      |                      |      |      |
|------------------------------------------|---|----------------------|----------------------|----------------------|------|------|
| Heavy                                    | 1 | 1.28(0.72,2.26) 0.40 | 0.97(0.57,1.64) 0.91 | 1.08(0.56,2.10) 0.82 | 0.88 |      |
| Healthy eating index score               |   |                      |                      |                      |      | 0.63 |
| Quarter 1                                | 1 | 1.21(0.73,2.01) 0.45 | 0.67(0.39,1.17) 0.16 | 0.96(0.52,1.77) 0.88 | 0.48 |      |
| Quarter 2                                | 1 | 1.05(0.68,1.63) 0.83 | 1.04(0.65,1.69) 0.86 | 0.71(0.38,1.32) 0.28 | 0.26 |      |
| Quarter 3                                | 1 | 1.32(0.75,2.30) 0.34 | 1.25(0.82,1.91) 0.30 | 1.29(0.70,2.38) 0.42 | 0.53 |      |
| Quarter 4                                | 1 | 0.90(0.54,1.49) 0.67 | 1.16(0.73,1.84) 0.53 | 1.03(0.54,1.96) 0.94 | 0.72 |      |
| Total energy intake from diet, kcal      |   |                      |                      |                      |      | 0.04 |
| [0,1445.5]                               | 1 | 1.10(0.81,1.49) 0.54 | 0.97(0.66,1.42) 0.88 | 1.50(0.97,2.31) 0.07 | 0.25 |      |
| (1445.5,1908]                            | 1 | 1.14(0.72,1.81) 0.58 | 0.93(0.60,1.44) 0.74 | 1.02(0.54,1.94) 0.95 | 0.75 |      |
| (1908,2494.5]                            | 1 | 0.82(0.42,1.59) 0.56 | 1.20(0.70,2.08) 0.51 | 1.15(0.63,2.09) 0.65 | 0.28 |      |
| (2494.5,15594]                           | 1 | 1.56(0.61,4.02) 0.35 | 0.97(0.40,2.32) 0.94 | 0.71(0.30,1.67) 0.43 | 0.02 |      |
| Self reported health                     |   |                      |                      |                      |      | 0.02 |
| Very good to excellent                   | 1 | 1.31(0.89,1.92) 0.17 | 1.36(0.91,2.04) 0.13 | 1.19(0.74,1.94) 0.47 | 0.48 |      |
| Good                                     | 1 | 1.17(0.75,1.83) 0.48 | 0.85(0.53,1.37) 0.51 | 1.29(0.76,2.20) 0.34 | 0.55 |      |
| Poor to fair                             | 1 | 0.84(0.52,1.34) 0.45 | 0.82(0.51,1.30) 0.40 | 0.56(0.32,0.98) 0.04 | 0.06 |      |
| Family history of cardiovascular disease |   |                      |                      |                      |      | 0.78 |
| No                                       | 1 | 1.21(0.93,1.56) 0.16 | 1.06(0.80,1.40) 0.67 | 1.12(0.78,1.63) 0.53 | 0.77 |      |
| Yes                                      | 1 | 0.88(0.46,1.72) 0.72 | 1.05(0.65,1.70) 0.83 | 0.86(0.48,1.57) 0.63 | 0.79 |      |
| Cardiovascular disease                   |   |                      |                      |                      |      | 0.91 |
| No                                       | 1 | 1.15(0.84,1.58) 0.40 | 1.11(0.82,1.50) 0.49 | 1.08(0.73,1.59) 0.71 | 0.82 |      |
| Yes                                      | 1 | 1.19(0.76,1.86) 0.46 | 1.02(0.67,1.57) 0.92 | 0.96(0.54,1.71) 0.89 | 0.74 |      |
| Chronic obstructive pulmonary diseases   |   |                      |                      |                      |      | 0.10 |
| No                                       | 1 | 1.06(0.81,1.40) 0.65 | 1.01(0.78,1.31) 0.93 | 0.92(0.64,1.32) 0.65 | 0.55 |      |
| Yes                                      | 1 | 1.45(0.85,2.48) 0.17 | 1.01(0.49,2.08) 0.98 | 1.45(0.75,2.81) 0.27 | 0.58 |      |
| History of chronic kidney disease        |   |                      |                      |                      |      | 0.79 |
| No                                       | 1 | 1.19(0.94,1.50) 0.14 | 1.07(0.85,1.36) 0.56 | 1.05(0.75,1.47) 0.78 | 0.97 |      |
| Yes                                      | 1 | 1.13(0.33,3.84) 0.84 | 1.51(0.40,5.65) 0.54 | 0.89(0.19,4.21) 0.88 | 0.91 |      |
| Cancer                                   |   |                      |                      |                      |      | 0.18 |
| No                                       | 1 | 1.05(0.80,1.37) 0.74 | 1.12(0.87,1.45) 0.38 | 1.09(0.77,1.55) 0.62 | 0.56 |      |
| Yes                                      | 1 | 1.44(0.89,2.32) 0.14 | 0.87(0.55,1.39) 0.56 | 0.80(0.45,1.45) 0.47 | 0.15 |      |

Adjusted for sex, age, race, BMI, educational level, smoking status, drinking status, family income poverty ratio, healthy eating index-2015, total energy intake from the diet, self-reported health status, family history of cardiovascular diseases, self-reported cardiovascular disease, self-reported chronic obstructive pulmonary disease, self-reported chronic kidney disease, and self-reported cancer.

**Supplementary Table 2.4** Subgroup analysis of hazard ratios for niacin levels with all-cause and CVD mortality in participants with prediabetes from NHANES 1999-2018

|                                     | Q1 | Q2                   | Q3                   | Q4                   | <i>P</i> <sub>trend</sub> | <i>P</i> <sub>interaction</sub> |
|-------------------------------------|----|----------------------|----------------------|----------------------|---------------------------|---------------------------------|
| <b>All-cause mortality</b>          |    |                      |                      |                      |                           |                                 |
| Sex                                 |    |                      |                      |                      |                           | 0.85                            |
| Male                                | 1  | 1.04(0.83,1.32) 0.72 | 0.99(0.79,1.24) 0.92 | 0.90(0.70,1.14) 0.37 | 0.24                      |                                 |
| Female                              | 1  | 1.06(0.88,1.28) 0.52 | 0.92(0.74,1.15) 0.49 | 0.91(0.66,1.26) 0.56 | 0.41                      |                                 |
| Age, years                          |    |                      |                      |                      |                           | 0.68                            |
| <60                                 | 1  | 1.03(0.72,1.48) 0.87 | 1.09(0.73,1.61) 0.68 | 0.98(0.68,1.41) 0.91 | 0.94                      |                                 |
| ≥60                                 | 1  | 1.06(0.91,1.24) 0.47 | 0.88(0.74,1.06) 0.17 | 0.86(0.72,1.04) 0.13 | 0.05                      |                                 |
| BMI, kg/m <sup>2</sup>              |    |                      |                      |                      |                           | 0.65                            |
| Normal weight (<25)                 | 1  | 1.02(0.78,1.35) 0.88 | 0.82(0.61,1.10) 0.18 | 0.82(0.57,1.17) 0.27 | 0.16                      |                                 |
| Overweight (25-30)                  | 1  | 1.21(0.94,1.57) 0.15 | 1.15(0.90,1.48) 0.27 | 1.02(0.74,1.39) 0.92 | 0.94                      |                                 |
| Obesity (≥30)                       | 1  | 0.94(0.76,1.17) 0.60 | 0.86(0.66,1.12) 0.28 | 0.82(0.60,1.12) 0.21 | 0.16                      |                                 |
| Race                                |    |                      |                      |                      |                           | 0.46                            |
| Non-Hispanic White                  | 1  | 1.08(0.90,1.30) 0.40 | 0.96(0.79,1.17) 0.68 | 0.91(0.73,1.12) 0.37 | 0.23                      |                                 |
| Non-Hispanic Black                  | 1  | 0.90(0.66,1.23) 0.52 | 0.76(0.50,1.15) 0.20 | 0.65(0.46,0.94) 0.02 | 0.02                      |                                 |
| Mexican American                    | 1  | 1.06(0.62,1.80) 0.83 | 0.71(0.39,1.28) 0.25 | 0.67(0.33,1.39) 0.29 | 0.19                      |                                 |
| Others                              | 1  | 0.75(0.44,1.29) 0.30 | 1.13(0.57,2.22) 0.73 | 1.57(0.78,3.18) 0.21 | 0.21                      |                                 |
| Education level                     |    |                      |                      |                      |                           | 0.10                            |
| Less than high school               | 1  | 1.19(0.94,1.51) 0.15 | 0.94(0.69,1.28) 0.70 | 0.81(0.59,1.13) 0.21 | 0.21                      |                                 |
| High school or equivalent           | 1  | 1.03(0.81,1.32) 0.78 | 1.10(0.82,1.48) 0.54 | 1.19(0.81,1.74) 0.39 | 0.34                      |                                 |
| College or above                    | 1  | 0.93(0.73,1.17) 0.54 | 0.78(0.61,1.01) 0.06 | 0.74(0.57,0.97) 0.03 | 0.01                      |                                 |
| Family income-poverty ratio         |    |                      |                      |                      |                           | 0.85                            |
| <1.0                                | 1  | 1.05(0.79,1.41) 0.73 | 0.86(0.62,1.21) 0.39 | 1.06(0.76,1.47) 0.73 | 0.89                      |                                 |
| 1.0-3.0                             | 1  | 1.09(0.90,1.32) 0.37 | 0.94(0.74,1.21) 0.66 | 0.85(0.68,1.07) 0.16 | 0.13                      |                                 |
| >3.0                                | 1  | 0.92(0.68,1.25) 0.61 | 0.91(0.67,1.23) 0.54 | 0.87(0.62,1.22) 0.43 | 0.42                      |                                 |
| Smoking status                      |    |                      |                      |                      |                           | 0.05                            |
| Never                               | 1  | 1.02(0.81,1.28) 0.86 | 1.05(0.82,1.35) 0.71 | 0.92(0.65,1.31) 0.65 | 0.78                      |                                 |
| Former                              | 1  | 1.00(0.80,1.26) 0.98 | 0.75(0.57,0.97) 0.03 | 0.84(0.62,1.13) 0.25 | 0.07                      |                                 |
| Current                             | 1  | 1.14(0.83,1.56) 0.43 | 1.13(0.79,1.62) 0.49 | 0.92(0.62,1.37) 0.68 | 0.71                      |                                 |
| Alcohol drinking                    |    |                      |                      |                      |                           | 0.03                            |
| Never                               | 1  | 1.02(0.84,1.26) 0.81 | 1.23(0.96,1.57) 0.10 | 0.82(0.58,1.17) 0.27 | 0.89                      |                                 |
| Low to moderate                     | 1  | 1.07(0.85,1.35) 0.57 | 0.72(0.56,0.92) 0.01 | 0.86(0.64,1.17) 0.34 | 0.06                      |                                 |
| Heavy                               | 1  | 0.95(0.67,1.34) 0.76 | 1.06(0.73,1.53) 0.76 | 0.87(0.61,1.22) 0.42 | 0.51                      |                                 |
| Healthy eating index score          |    |                      |                      |                      |                           | 0.72                            |
| Quarter 1                           | 1  | 0.99(0.71,1.38) 0.94 | 0.93(0.63,1.39) 0.73 | 1.12(0.76,1.65) 0.57 | 0.78                      |                                 |
| Quarter 2                           | 1  | 0.87(0.65,1.16) 0.33 | 0.85(0.61,1.18) 0.33 | 0.58(0.40,0.86) 0.01 | 0.01                      |                                 |
| Quarter 3                           | 1  | 1.22(0.92,1.61) 0.17 | 1.04(0.74,1.45) 0.84 | 1.04(0.70,1.54) 0.84 | 0.97                      |                                 |
| Quarter 4                           | 1  | 1.14(0.87,1.50) 0.33 | 0.96(0.73,1.27) 0.77 | 0.98(0.70,1.38) 0.92 | 0.63                      |                                 |
| Total energy intake from diet, kcal |    |                      |                      |                      |                           | 0.92                            |
| [0,1445.5]                          | 1  | 1.10(0.88,1.36) 0.40 | 0.95(0.69,1.31) 0.76 | 0.76(0.47,1.24) 0.28 | 0.60                      |                                 |
| (1445.5,1908]                       | 1  | 1.11(0.83,1.47) 0.48 | 0.96(0.70,1.32) 0.80 | 0.90(0.62,1.32) 0.60 | 0.49                      |                                 |
| (1908,2494.5]                       | 1  | 0.93(0.63,1.36) 0.70 | 0.88(0.61,1.27) 0.50 | 0.81(0.55,1.19) 0.28 | 0.23                      |                                 |
| (2494.5,15594]                      | 1  | 0.75(0.41,1.37) 0.35 | 0.92(0.55,1.56) 0.77 | 0.89(0.52,1.50) 0.65 | 0.95                      |                                 |
| Self reported health                |    |                      |                      |                      |                           | 0.02                            |
| Very good to excellent              | 1  | 1.18(0.95,1.48) 0.14 | 0.79(0.59,1.06) 0.12 | 1.07(0.80,1.43) 0.65 | 0.71                      |                                 |



|                                          |   |                      |                      |                       |      |
|------------------------------------------|---|----------------------|----------------------|-----------------------|------|
| Good                                     | 1 | 1.09(0.83,1.42) 0.54 | 1.04(0.79,1.39) 0.77 | 0.78(0.54,1.11) 0.17  | 0.22 |
| Poor to fair                             | 1 | 0.90(0.72,1.13) 0.36 | 0.93(0.69,1.25) 0.63 | 0.83(0.59,1.17) 0.29  | 0.36 |
| Family history of cardiovascular disease |   |                      |                      |                       | 0.71 |
| No                                       | 1 | 1.07(0.91,1.27) 0.41 | 0.94(0.78,1.14) 0.54 | 0.95(0.78,1.18) 0.66  | 0.42 |
| Yes                                      | 1 | 0.94(0.71,1.25) 0.67 | 0.91(0.66,1.26) 0.56 | 0.73(0.51,1.06) 0.10  | 0.10 |
| Cardiovascular disease                   |   |                      |                      |                       | 0.39 |
| No                                       | 1 | 0.94(0.79,1.13) 0.50 | 0.87(0.73,1.05) 0.15 | 0.83(0.66,1.05) 0.13  | 0.07 |
| Yes                                      | 1 | 1.32(1.05,1.67) 0.02 | 1.12(0.83,1.51) 0.46 | 1.06(0.75,1.50) 0.74  | 0.82 |
| Chronic obstructive pulmonary diseases   |   |                      |                      |                       | 0.12 |
| No                                       | 1 | 0.99(0.86,1.15) 0.94 | 0.96(0.81,1.13) 0.60 | 0.88(0.74,1.05) 0.16  | 0.15 |
| Yes                                      | 1 | 1.45(0.99,2.13) 0.06 | 0.82(0.50,1.33) 0.42 | 0.98(0.54,1.78) 0.94  | 0.45 |
| History of chronic kidney disease        |   |                      |                      |                       | 0.99 |
| No                                       | 1 | 1.05(0.90,1.23) 0.53 | 0.96(0.80,1.14) 0.61 | 0.91(0.76,1.10) 0.34  | 0.23 |
| Yes                                      | 1 | 1.02(0.52,2.01) 0.95 | 0.70(0.29,1.71) 0.43 | 0.65(0.23,1.85) 0.42  | 0.28 |
| Cancer                                   |   |                      |                      |                       | 0.93 |
| No                                       | 1 | 1.04(0.87,1.24) 0.70 | 0.91(0.75,1.09) 0.31 | 0.88(0.71,1.09) 0.24  | 0.14 |
| Yes                                      | 1 | 1.11(0.79,1.57) 0.54 | 1.11(0.75,1.65) 0.59 | 1.02(0.68,1.52) 0.93  | 0.89 |
| <b>CVD mortality</b>                     |   |                      |                      |                       |      |
| Sex                                      |   |                      |                      |                       | 0.36 |
| Male                                     | 1 | 1.01(0.63,1.62) 0.96 | 1.04(0.70,1.54) 0.86 | 1.11(0.66,1.88) 0.70  | 0.67 |
| Female                                   | 1 | 1.11(0.78,1.60) 0.56 | 0.98(0.60,1.60) 0.93 | 0.73(0.39,1.37) 0.33  | 0.51 |
| Age, years                               |   |                      |                      |                       | 0.90 |
| <60                                      | 1 | 0.75(0.32,1.78) 0.52 | 0.60(0.23,1.55) 0.29 | 0.90(0.30,2.69) 0.84  | 0.86 |
| ≥60                                      | 1 | 1.08(0.82,1.43) 0.59 | 1.00(0.74,1.36) 0.98 | 0.99(0.70,1.42) 0.98  | 0.91 |
| BMI, kg/m2                               |   |                      |                      |                       | 0.68 |
| Normal weight (<25)                      | 1 | 0.86(0.56,1.31) 0.47 | 0.78(0.46,1.33) 0.36 | 0.78(0.43,1.42) 0.42  | 0.37 |
| Overweight (25-30)                       | 1 | 1.37(0.85,2.19) 0.20 | 1.27(0.82,1.97) 0.29 | 1.08(0.61,1.90) 0.79  | 0.79 |
| Obesity (≥30)                            | 1 | 1.00(0.62,1.60) 0.99 | 0.97(0.60,1.55) 0.89 | 1.20(0.66,2.17) 0.55  | 0.61 |
| Race                                     |   |                      |                      |                       | 0.63 |
| Non-Hispanic White                       | 1 | 1.08(0.76,1.52) 0.68 | 0.95(0.65,1.39) 0.81 | 0.97(0.61,1.54) 0.88  | 0.76 |
| Non-Hispanic Black                       | 1 | 0.93(0.53,1.63) 0.79 | 0.61(0.29,1.30) 0.20 | 0.85(0.43,1.66) 0.63  | 0.40 |
| Mexican American                         | 1 | 0.82(0.35,1.91) 0.65 | 0.80(0.35,1.83) 0.60 | 1.25(0.38,4.13) 0.71  | 0.91 |
| Others                                   | 1 | 0.50(0.09,2.66) 0.42 | 1.65(0.37,7.29) 0.51 | 4.22(0.58,30.88) 0.16 | 0.18 |
| Education level                          |   |                      |                      |                       | 0.17 |
| Less than high school                    | 1 | 1.29(0.83,2.01) 0.25 | 0.97(0.55,1.70) 0.91 | 1.05(0.56,1.97) 0.87  | 1    |
| High school or equivalent                | 1 | 0.77(0.46,1.31) 0.34 | 1.16(0.67,2.00) 0.60 | 1.41(0.68,2.92) 0.35  | 0.21 |
| College or above                         | 1 | 1.05(0.66,1.67) 0.83 | 0.84(0.51,1.37) 0.48 | 0.80(0.47,1.35) 0.41  | 0.28 |
| Family income-poverty ratio              |   |                      |                      |                       | 0.63 |
| <1.0                                     | 1 | 0.68(0.42,1.12) 0.13 | 0.71(0.38,1.35) 0.30 | 0.87(0.43,1.79) 0.71  | 0.61 |
| 1.0-3.0                                  | 1 | 1.18(0.82,1.71) 0.37 | 1.13(0.73,1.73) 0.59 | 0.95(0.59,1.51) 0.81  | 0.91 |
| >3.0                                     | 1 | 0.89(0.50,1.56) 0.67 | 0.81(0.47,1.42) 0.47 | 0.96(0.49,1.88) 0.91  | 0.87 |
| Smoking status                           |   |                      |                      |                       | 0.62 |
| Never                                    | 1 | 0.95(0.63,1.43) 0.81 | 0.89(0.57,1.39) 0.61 | 0.97(0.54,1.75) 0.92  | 0.79 |
| Former                                   | 1 | 0.94(0.58,1.51) 0.80 | 0.85(0.53,1.37) 0.51 | 0.85(0.48,1.50) 0.57  | 0.50 |
| Current                                  | 1 | 1.68(0.86,3.29) 0.13 | 1.40(0.59,3.34) 0.45 | 1.60(0.70,3.66) 0.27  | 0.38 |
| Alcohol drinking                         |   |                      |                      |                       | 0.25 |
| Never                                    | 1 | 1.05(0.72,1.53) 0.79 | 1.26(0.82,1.95) 0.29 | 0.70(0.38,1.27) 0.24  | 0.71 |

|                                          |   |                      |                      |                      |      |
|------------------------------------------|---|----------------------|----------------------|----------------------|------|
| Low to moderate                          | 1 | 1.07(0.66,1.75) 0.77 | 0.80(0.44,1.45) 0.46 | 1.14(0.58,2.25) 0.70 | 0.96 |
| Heavy                                    | 1 | 0.88(0.44,1.76) 0.71 | 1.09(0.60,1.98) 0.78 | 1.00(0.47,2.12) 1.00 | 0.86 |
| Healthy eating index score               |   |                      |                      |                      | 0.23 |
| Quarter 1                                | 1 | 1.28(0.68,2.44) 0.45 | 0.85(0.43,1.68) 0.64 | 1.63(0.65,4.08) 0.30 | 0.58 |
| Quarter 2                                | 1 | 0.93(0.53,1.64) 0.80 | 1.06(0.54,2.06) 0.87 | 0.67(0.28,1.58) 0.36 | 0.49 |
| Quarter 3                                | 1 | 0.76(0.44,1.31) 0.32 | 1.06(0.61,1.85) 0.84 | 1.38(0.65,2.93) 0.40 | 0.33 |
| Quarter 4                                | 1 | 1.13(0.69,1.85) 0.63 | 0.81(0.48,1.35) 0.41 | 0.76(0.41,1.40) 0.38 | 0.22 |
| Total energy intake from diet, kcal      |   |                      |                      |                      | 0.76 |
| [0,1445.5]                               | 1 | 0.96(0.62,1.50) 0.86 | 1.07(0.67,1.72) 0.77 | 1.12(0.48,2.60) 0.79 | 0.78 |
| (1445.5,1908]                            | 1 | 1.19(0.72,1.94) 0.50 | 1.21(0.72,2.03) 0.47 | 0.91(0.52,1.60) 0.75 | 0.93 |
| (1908,2494.5]                            | 1 | 0.84(0.46,1.54) 0.57 | 0.69(0.36,1.33) 0.27 | 0.89(0.45,1.76) 0.73 | 0.72 |
| (2494.5,15594]                           | 1 | 0.50(0.10,2.42) 0.39 | 0.88(0.30,2.55) 0.81 | 0.76(0.26,2.19) 0.61 | 1    |
| Self reported health                     |   |                      |                      |                      | 0.01 |
| Very good to excellent                   | 1 | 1.45(0.91,2.31) 0.12 | 1.00(0.55,1.79) 0.99 | 1.73(1.03,2.92) 0.04 | 0.15 |
| Good                                     | 1 | 1.04(0.64,1.68) 0.88 | 1.09(0.67,1.79) 0.72 | 0.79(0.39,1.59) 0.51 | 0.63 |
| Poor to fair                             | 1 | 0.68(0.41,1.13) 0.14 | 0.78(0.44,1.38) 0.39 | 0.70(0.34,1.41) 0.32 | 0.36 |
| Family history of cardiovascular disease |   |                      |                      |                      | 0.01 |
| No                                       | 1 | 0.96(0.70,1.32) 0.80 | 0.86(0.60,1.23) 0.41 | 1.17(0.76,1.80) 0.47 | 0.67 |
| Yes                                      | 1 | 1.19(0.73,1.94) 0.48 | 1.23(0.73,2.08) 0.43 | 0.54(0.25,1.18) 0.12 | 0.24 |
| Cardiovascular disease                   |   |                      |                      |                      | 0.29 |
| No                                       | 1 | 0.83(0.58,1.18) 0.30 | 0.86(0.60,1.24) 0.43 | 0.85(0.50,1.44) 0.55 | 0.56 |
| Yes                                      | 1 | 1.53(0.98,2.40) 0.06 | 1.16(0.70,1.92) 0.57 | 1.42(0.78,2.58) 0.25 | 0.38 |
| Chronic obstructive pulmonary diseases   |   |                      |                      |                      | 0.05 |
| No                                       | 1 | 0.90(0.66,1.23) 0.50 | 0.95(0.68,1.31) 0.74 | 0.96(0.65,1.42) 0.83 | 0.87 |
| Yes                                      | 1 | 3.24(1.25,8.40) 0.02 | 1.13(0.37,3.47) 0.83 | 1.27(0.42,3.87) 0.68 | 0.89 |
| History of chronic kidney disease        |   |                      |                      |                      | 0.36 |
| No                                       | 1 | 1.06(0.78,1.43) 0.73 | 0.95(0.67,1.34) 0.77 | 1.04(0.70,1.56) 0.84 | 1    |
| Yes                                      | 1 | 0.75(0.21,2.72) 0.66 | 0.90(0.13,6.27) 0.92 | 0.56(0.06,5.51) 0.62 | 0.72 |
| Cancer                                   |   |                      |                      |                      | 0.24 |
| No                                       | 1 | 1.03(0.74,1.44) 0.85 | 0.89(0.63,1.25) 0.49 | 0.89(0.56,1.41) 0.62 | 0.50 |
| Yes                                      | 1 | 1.10(0.56,2.17) 0.77 | 1.42(0.68,2.94) 0.35 | 1.64(0.77,3.47) 0.20 | 0.16 |
| <b>Cancer mortality</b>                  |   |                      |                      |                      |      |
| Sex                                      |   |                      |                      |                      | 0.93 |
| Male                                     | 1 | 0.90(0.58,1.40) 0.64 | 0.87(0.55,1.38) 0.56 | 0.77(0.51,1.17) 0.22 | 0.24 |
| Female                                   | 1 | 0.81(0.52,1.24) 0.33 | 0.73(0.46,1.18) 0.20 | 0.63(0.32,1.23) 0.17 | 0.09 |
| Age, years                               |   |                      |                      |                      | 0.56 |
| <60                                      | 1 | 0.75(0.39,1.46) 0.40 | 0.96(0.51,1.81) 0.90 | 0.60(0.32,1.10) 0.10 | 0.19 |
| ≥60                                      | 1 | 0.91(0.68,1.22) 0.53 | 0.75(0.52,1.09) 0.13 | 0.83(0.55,1.24) 0.35 | 0.23 |
| BMI, kg/m2                               |   |                      |                      |                      | 0.59 |
| Normal weight (<25)                      | 1 | 0.71(0.42,1.20) 0.20 | 0.74(0.43,1.29) 0.29 | 0.76(0.39,1.46) 0.41 | 0.43 |
| Overweight (25-30)                       | 1 | 1.12(0.64,1.94) 0.69 | 1.12(0.66,1.92) 0.67 | 0.90(0.48,1.70) 0.75 | 0.78 |
| Obesity (≥30)                            | 1 | 0.82(0.50,1.35) 0.43 | 0.65(0.37,1.13) 0.13 | 0.52(0.28,0.95) 0.03 | 0.02 |
| Race                                     |   |                      |                      |                      | 0.90 |
| Non-Hispanic White                       | 1 | 0.88(0.61,1.26) 0.49 | 0.84(0.59,1.21) 0.35 | 0.74(0.50,1.10) 0.13 | 0.13 |
| Non-Hispanic Black                       | 1 | 0.75(0.43,1.33) 0.33 | 0.86(0.45,1.63) 0.64 | 0.55(0.26,1.20) 0.13 | 0.17 |
| Mexican American                         | 1 | 0.39(0.16,0.96) 0.04 | 0.34(0.10,1.18) 0.09 | 0.20(0.06,0.67) 0.01 | 0.01 |
| Others                                   | 1 | 1.28(0.44,3.69) 0.65 | 1.30(0.41,4.11) 0.65 | 1.52(0.47,4.86) 0.48 | 0.52 |

|                                          |   |                 |      |                 |      |                 |      |       |
|------------------------------------------|---|-----------------|------|-----------------|------|-----------------|------|-------|
| Education level                          |   |                 |      |                 |      |                 | 0.02 |       |
| Less than high school                    | 1 | 0.93(0.56,1.52) | 0.76 | 0.91(0.56,1.49) | 0.71 | 0.57(0.34,0.95) | 0.03 | 0.04  |
| High school or equivalent                | 1 | 0.85(0.45,1.62) | 0.63 | 1.59(0.81,3.12) | 0.18 | 1.32(0.72,2.40) | 0.37 | 0.15  |
| College or above                         | 1 | 0.75(0.47,1.20) | 0.22 | 0.46(0.29,0.74) |      | 0.49(0.28,0.86) | 0.01 | 0.002 |
| Family income-poverty ratio              |   |                 |      |                 |      |                 | 0.84 |       |
| <1.0                                     | 1 | 0.86(0.48,1.54) | 0.61 | 0.66(0.34,1.29) | 0.23 | 0.38(0.13,1.04) | 0.06 | 0.04  |
| 1.0-3.0                                  | 1 | 0.91(0.58,1.42) | 0.67 | 1.00(0.63,1.59) | 0.99 | 0.97(0.64,1.46) | 0.87 | 1     |
| >3.0                                     | 1 | 0.82(0.48,1.41) | 0.48 | 0.74(0.43,1.28) | 0.28 | 0.65(0.35,1.22) | 0.18 | 0.16  |
| Smoking status                           |   |                 |      |                 |      |                 | 0.28 |       |
| Never                                    | 1 | 0.53(0.31,0.89) | 0.02 | 0.77(0.43,1.39) | 0.39 | 0.60(0.32,1.12) | 0.11 | 0.22  |
| Former                                   | 1 | 1.15(0.75,1.77) | 0.53 | 0.82(0.49,1.36) | 0.45 | 1.05(0.61,1.81) | 0.86 | 0.81  |
| Current                                  | 1 | 0.90(0.48,1.69) | 0.74 | 0.97(0.51,1.87) | 0.93 | 0.51(0.24,1.10) | 0.09 | 0.10  |
| Alcohol drinking                         |   |                 |      |                 |      |                 | 0.11 |       |
| Never                                    | 1 | 0.66(0.40,1.09) | 0.10 | 1.24(0.72,2.14) | 0.45 | 0.78(0.39,1.56) | 0.48 | 1     |
| Low to moderate                          | 1 | 1.07(0.68,1.70) | 0.76 | 0.57(0.35,0.94) | 0.03 | 0.64(0.40,1.04) | 0.07 | 0.01  |
| Heavy                                    | 1 | 0.61(0.29,1.28) | 0.19 | 0.92(0.46,1.84) | 0.82 | 0.58(0.28,1.23) | 0.15 | 0.29  |
| Healthy eating index score               |   |                 |      |                 |      |                 | 0.98 |       |
| Quarter 1                                | 1 | 0.71(0.42,1.19) | 0.20 | 0.60(0.30,1.21) | 0.16 | 0.42(0.19,0.92) | 0.03 | 0.02  |
| Quarter 2                                | 1 | 0.71(0.37,1.38) | 0.31 | 0.70(0.38,1.28) | 0.24 | 0.63(0.35,1.14) | 0.13 | 0.12  |
| Quarter 3                                | 1 | 1.00(0.55,1.83) | 0.99 | 1.16(0.55,2.44) | 0.69 | 0.91(0.49,1.71) | 0.78 | 0.94  |
| Quarter 4                                | 1 | 0.97(0.51,1.84) | 0.92 | 0.86(0.48,1.54) | 0.61 | 0.87(0.44,1.73) | 0.70 | 0.62  |
| Total energy intake from diet, kcal      |   |                 |      |                 |      |                 | 0.66 |       |
| [0,1445.5]                               | 1 | 0.84(0.51,1.39) | 0.50 | 0.69(0.34,1.38) | 0.29 | 0.56(0.19,1.60) | 0.28 | 0.14  |
| (1445.5,1908]                            | 1 | 1.00(0.62,1.62) | 1.00 | 0.59(0.28,1.25) | 0.17 | 0.74(0.42,1.31) | 0.30 | 0.11  |
| (1908,2494.5]                            | 1 | 0.86(0.43,1.74) | 0.68 | 1.09(0.53,2.24) | 0.82 | 0.71(0.33,1.51) | 0.37 | 0.56  |
| (2494.5,15594]                           | 1 | 0.65(0.24,1.77) | 0.40 | 0.98(0.39,2.45) | 0.96 | 0.79(0.32,1.92) | 0.60 | 0.78  |
| Self reported health                     |   |                 |      |                 |      |                 | 0.87 |       |
| Very good to excellent                   | 1 | 0.68(0.37,1.26) | 0.23 | 0.56(0.29,1.08) | 0.09 | 0.54(0.27,1.06) | 0.07 | 0.05  |
| Good                                     | 1 | 1.01(0.58,1.75) | 0.97 | 0.92(0.53,1.60) | 0.77 | 0.64(0.32,1.26) | 0.20 | 0.20  |
| Poor to fair                             | 1 | 0.88(0.53,1.48) | 0.63 | 0.87(0.52,1.47) | 0.61 | 0.79(0.45,1.40) | 0.43 | 0.45  |
| Family history of cardiovascular disease |   |                 |      |                 |      |                 | 0.24 |       |
| No                                       | 1 | 0.92(0.64,1.33) | 0.66 | 0.87(0.60,1.26) | 0.46 | 0.63(0.41,0.96) | 0.03 | 0.04  |
| Yes                                      | 1 | 0.70(0.39,1.25) | 0.23 | 0.68(0.36,1.30) | 0.24 | 0.91(0.54,1.55) | 0.73 | 0.67  |
| Cardiovascular disease                   |   |                 |      |                 |      |                 | 0.58 |       |
| No                                       | 1 | 0.88(0.61,1.27) | 0.49 | 0.79(0.54,1.15) | 0.21 | 0.73(0.49,1.10) | 0.14 | 0.10  |
| Yes                                      | 1 | 0.68(0.37,1.25) | 0.22 | 0.90(0.47,1.72) | 0.75 | 0.61(0.29,1.29) | 0.20 | 0.33  |
| Chronic obstructive pulmonary diseases   |   |                 |      |                 |      |                 | 0.24 |       |
| No                                       | 1 | 0.87(0.63,1.22) | 0.42 | 0.93(0.68,1.28) | 0.66 | 0.78(0.54,1.13) | 0.19 | 0.24  |
| Yes                                      | 1 | 0.55(0.19,1.60) | 0.27 | 0.11(0.03,0.40) |      | 0.20(0.06,0.69) | 0.01 | 0.002 |
| History of chronic kidney disease        |   |                 |      |                 |      |                 | 0.23 |       |
| No                                       | 1 | 0.89(0.65,1.22) | 0.48 | 0.86(0.63,1.19) | 0.37 | 0.74(0.51,1.07) | 0.11 | 0.10  |
| Yes                                      | 1 | 0.06(0.00,1.10) | 0.06 | 0.04(0.00,0.60) | 0.02 | 0.07(0.01,0.91) | 0.04 | 0.05  |
| Cancer                                   |   |                 |      |                 |      |                 | 0.65 |       |
| No                                       | 1 | 0.81(0.55,1.18) | 0.28 | 0.87(0.60,1.28) | 0.49 | 0.68(0.45,1.04) | 0.07 | 0.10  |
| Yes                                      | 1 | 0.90(0.51,1.57) | 0.70 | 0.69(0.39,1.21) | 0.20 | 0.80(0.40,1.61) | 0.53 | 0.37  |
| <b>Other mortality</b>                   |   |                 |      |                 |      |                 |      |       |

|                                          |   |                      |                      |                      |      |  |      |
|------------------------------------------|---|----------------------|----------------------|----------------------|------|--|------|
| Sex                                      |   |                      |                      |                      |      |  | 0.46 |
| Male                                     | 1 | 1.18(0.82,1.69) 0.37 | 1.04(0.68,1.58) 0.86 | 0.85(0.59,1.23) 0.39 | 0.20 |  |      |
| Female                                   | 1 | 1.20(0.92,1.57) 0.18 | 1.00(0.67,1.50) 0.98 | 1.20(0.76,1.90) 0.44 | 0.59 |  |      |
| Age, years                               |   |                      |                      |                      |      |  | 0.29 |
| <60                                      | 1 | 1.49(0.83,2.66) 0.18 | 1.48(0.80,2.74) 0.21 | 1.46(0.86,2.48) 0.16 | 0.27 |  |      |
| ≥60                                      | 1 | 1.14(0.87,1.49) 0.35 | 0.88(0.63,1.21) 0.42 | 0.79(0.54,1.17) 0.24 | 0.16 |  |      |
| BMI, kg/m2                               |   |                      |                      |                      |      |  | 0.55 |
| Normal weight (<25)                      | 1 | 1.41(0.94,2.13) 0.10 | 0.88(0.54,1.44) 0.61 | 0.90(0.52,1.55) 0.69 | 0.51 |  |      |
| Overweight (25-30)                       | 1 | 1.20(0.80,1.81) 0.37 | 1.09(0.72,1.65) 0.68 | 1.06(0.65,1.72) 0.82 | 0.90 |  |      |
| Obesity (≥30)                            | 1 | 1.00(0.73,1.38) 0.98 | 0.97(0.62,1.51) 0.88 | 0.84(0.50,1.43) 0.52 | 0.53 |  |      |
| Race                                     |   |                      |                      |                      |      |  | 0.86 |
| Non-Hispanic White                       | 1 | 1.24(0.93,1.65) 0.15 | 1.04(0.72,1.48) 0.85 | 0.99(0.69,1.43) 0.97 | 0.79 |  |      |
| Non-Hispanic Black                       | 1 | 1.03(0.66,1.60) 0.90 | 0.81(0.39,1.68) 0.57 | 0.63(0.29,1.36) 0.24 | 0.27 |  |      |
| Mexican American                         | 1 | 2.09(0.91,4.80) 0.08 | 0.96(0.36,2.57) 0.93 | 1.08(0.39,3.01) 0.89 | 0.85 |  |      |
| Others                                   | 1 | 0.59(0.30,1.17) 0.13 | 0.78(0.32,1.88) 0.58 | 0.98(0.41,2.36) 0.96 | 0.99 |  |      |
| Education level                          |   |                      |                      |                      |      |  | 0.71 |
| Less than high school                    | 1 | 1.25(0.86,1.82) 0.24 | 0.91(0.53,1.54) 0.72 | 0.80(0.44,1.44) 0.45 | 0.46 |  |      |
| High school or equivalent                | 1 | 1.31(0.89,1.92) 0.17 | 0.84(0.51,1.39) 0.51 | 1.00(0.60,1.69) 0.99 | 0.62 |  |      |
| College or above                         | 1 | 1.02(0.74,1.40) 0.91 | 1.04(0.71,1.53) 0.82 | 0.95(0.61,1.49) 0.83 | 0.87 |  |      |
| Family income-poverty ratio              |   |                      |                      |                      |      |  | 0.8  |
| <1.0                                     | 1 | 1.56(0.99,2.46) 0.06 | 1.13(0.67,1.92) 0.64 | 1.90(1.10,3.29) 0.02 | 0.07 |  |      |
| 1.0-3.0                                  | 1 | 1.12(0.82,1.51) 0.48 | 0.81(0.54,1.23) 0.33 | 0.74(0.49,1.11) 0.14 | 0.10 |  |      |
| >3.0                                     | 1 | 1.08(0.66,1.78) 0.76 | 1.18(0.68,2.05) 0.55 | 1.09(0.62,1.92) 0.77 | 0.70 |  |      |
| Smoking status                           |   |                      |                      |                      |      |  | 0.06 |
| Never                                    | 1 | 1.46(1.00,2.12) 0.05 | 1.40(0.93,2.09) 0.10 | 1.09(0.61,1.94) 0.78 | 0.58 |  |      |
| Former                                   | 1 | 0.98(0.72,1.34) 0.92 | 0.66(0.45,0.98) 0.04 | 0.74(0.47,1.16) 0.20 | 0.06 |  |      |
| Current                                  | 1 | 1.17(0.69,1.99) 0.56 | 1.19(0.67,2.14) 0.55 | 1.11(0.60,2.07) 0.73 | 0.74 |  |      |
| Alcohol drinking                         |   |                      |                      |                      |      |  | 0.56 |
| Never                                    | 1 | 1.26(0.90,1.76) 0.19 | 1.25(0.83,1.90) 0.29 | 0.97(0.55,1.71) 0.91 | 0.82 |  |      |
| Low to moderate                          | 1 | 1.06(0.74,1.51) 0.76 | 0.77(0.53,1.13) 0.19 | 0.86(0.54,1.38) 0.54 | 0.28 |  |      |
| Heavy                                    | 1 | 1.23(0.69,2.20) 0.48 | 1.10(0.54,2.24) 0.79 | 0.97(0.54,1.75) 0.93 | 0.69 |  |      |
| Healthy eating index score               |   |                      |                      |                      |      |  | 0.02 |
| Quarter 1                                | 1 | 1.01(0.63,1.63) 0.97 | 1.36(0.73,2.56) 0.34 | 1.86(0.96,3.63) 0.07 | 0.06 |  |      |
| Quarter 2                                | 1 | 0.93(0.62,1.41) 0.74 | 0.83(0.50,1.38) 0.46 | 0.48(0.27,0.86) 0.01 | 0.02 |  |      |
| Quarter 3                                | 1 | 1.73(1.15,2.60) 0.01 | 0.94(0.57,1.54) 0.79 | 0.83(0.48,1.42) 0.49 | 0.24 |  |      |
| Quarter 4                                | 1 | 1.29(0.85,1.98) 0.24 | 1.15(0.73,1.83) 0.54 | 1.28(0.72,2.28) 0.40 | 0.52 |  |      |
| Total energy intake from diet, kcal      |   |                      |                      |                      |      |  | 0.94 |
| [0,1445.5]                               | 1 | 1.35(1.00,1.83) 0.05 | 1.05(0.64,1.72) 0.85 | 0.62(0.28,1.39) 0.25 | 0.87 |  |      |
| (1445.5,1908]                            | 1 | 1.11(0.75,1.65) 0.60 | 1.08(0.71,1.64) 0.72 | 0.98(0.53,1.83) 0.95 | 1    |  |      |
| (1908,2494.5]                            | 1 | 1.02(0.57,1.85) 0.94 | 0.88(0.48,1.61) 0.68 | 0.78(0.40,1.51) 0.46 | 0.30 |  |      |
| (2494.5,15594]                           | 1 | 1.06(0.45,2.49) 0.90 | 0.96(0.44,2.14) 0.93 | 1.14(0.52,2.46) 0.75 | 0.67 |  |      |
| Self reported health                     |   |                      |                      |                      |      |  | 0.49 |
| Very good to excellent                   | 1 | 1.31(0.93,1.85) 0.12 | 0.80(0.50,1.30) 0.37 | 1.04(0.64,1.69) 0.86 | 0.73 |  |      |
| Good                                     | 1 | 1.15(0.79,1.67) 0.46 | 1.07(0.70,1.64) 0.74 | 0.85(0.50,1.44) 0.55 | 0.56 |  |      |
| Poor to fair                             | 1 | 1.12(0.75,1.67) 0.57 | 1.12(0.66,1.91) 0.67 | 1.01(0.57,1.78) 0.97 | 0.95 |  |      |
| Family history of cardiovascular disease |   |                      |                      |                      |      |  | 0.94 |
| No                                       | 1 | 1.25(0.96,1.64) 0.10 | 1.03(0.75,1.41) 0.85 | 1.04(0.74,1.48) 0.81 | 0.96 |  |      |

|                                        |   |                      |                      |                      |      |
|----------------------------------------|---|----------------------|----------------------|----------------------|------|
| Yes                                    | 1 | 0.96(0.60,1.55) 0.87 | 0.89(0.50,1.59) 0.70 | 0.72(0.43,1.20) 0.21 | 0.23 |
| Cardiovascular disease                 |   |                      |                      |                      | 0.59 |
| No                                     | 1 | 1.06(0.81,1.37) 0.68 | 0.95(0.70,1.28) 0.72 | 0.90(0.63,1.29) 0.58 | 0.48 |
| Yes                                    | 1 | 1.54(1.07,2.20) 0.02 | 1.17(0.68,2.00) 0.57 | 1.03(0.59,1.78) 0.93 | 0.98 |
| Chronic obstructive pulmonary diseases |   |                      |                      |                      | 0.42 |
| No                                     | 1 | 1.17(0.93,1.46) 0.18 | 0.98(0.72,1.32) 0.88 | 0.92(0.66,1.27) 0.60 | 0.47 |
| Yes                                    | 1 | 1.53(0.85,2.74) 0.15 | 1.40(0.77,2.53) 0.27 | 1.55(0.72,3.37) 0.26 | 0.28 |
| History of chronic kidney disease      |   |                      |                      |                      | 0.27 |
| No                                     | 1 | 1.16(0.90,1.51) 0.26 | 1.02(0.74,1.41) 0.91 | 0.96(0.69,1.33) 0.81 | 0.70 |
| Yes                                    | 1 | 2.27(0.79,6.51) 0.13 | 0.91(0.26,3.17) 0.88 | 1.11(0.21,6.02) 0.90 | 0.95 |
| Cancer                                 |   |                      |                      |                      | 0.18 |
| No                                     | 1 | 1.18(0.91,1.53) 0.22 | 0.93(0.66,1.30) 0.66 | 1.02(0.74,1.41) 0.90 | 0.76 |
| Yes                                    | 1 | 1.42(0.86,2.35) 0.17 | 1.47(0.78,2.78) 0.23 | 0.88(0.45,1.75) 0.72 | 0.97 |

Adjusted for sex, age, race, BMI, educational level, smoking status, drinking status, family income poverty ratio, healthy eating index-2015, total energy intake from the diet, self-reported health status, family history of cardiovascular diseases, self-reported cardiovascular disease, self-reported chronic obstructive pulmonary disease, self-reported chronic kidney disease, and self-reported cancer.

**Supplementary Table 2.5** Subgroup analysis of hazard ratios for vitamin B6 levels with all-cause and CVD mortality in participants with prediabetes from NHANES 1999-2018

|                                     | Q1 | Q2                     | Q3                    | Q4                   | <i>P</i> <sub>trend</sub> | <i>P</i> <sub>interaction</sub> |
|-------------------------------------|----|------------------------|-----------------------|----------------------|---------------------------|---------------------------------|
| <b>All-cause mortality</b>          |    |                        |                       |                      |                           |                                 |
| Sex                                 |    |                        |                       |                      |                           | 0.69                            |
| Male                                | 1  | 1.09(0.86,1.37) 0.49   | 1.11(0.86,1.43) 0.42  | 1.09(0.84,1.42) 0.51 | 0.56                      |                                 |
| Female                              | 1  | 1.09(0.92,1.30) 0.32   | 1.19(0.95,1.49) 0.13  | 0.99(0.76,1.31) 0.96 | 0.56                      |                                 |
| Age, years                          |    |                        |                       |                      |                           | 0.48                            |
| <60                                 | 1  | 0.85(0.58,1.25) 0.40   | 1.13(0.75,1.69) 0.56  | 0.87(0.58,1.31) 0.51 | 0.86                      |                                 |
| ≥60                                 | 1  | 1.11(0.96,1.28) 0.16   | 1.11(0.90,1.36) 0.34  | 1.11(0.89,1.39) 0.35 | 0.40                      |                                 |
| BMI, kg/m <sup>2</sup>              |    |                        |                       |                      |                           | 0.36                            |
| Normal weight (<25)                 | 1  | 1.07(0.82,1.40) 0.62   | 1.04(0.77,1.42) 0.79  | 1.05(0.75,1.48) 0.76 | 0.81                      |                                 |
| Overweight (25-30)                  | 1  | 1.05(0.80,1.38) 0.70   | 1.42(1.05,1.92) 0.02  | 1.13(0.80,1.60) 0.50 | 0.25                      |                                 |
| Obesity (≥30)                       | 1  | 1.06(0.82,1.36) 0.67   | 0.94(0.69,1.28) 0.69  | 0.94(0.68,1.30) 0.71 | 0.54                      |                                 |
| Race                                |    |                        |                       |                      |                           | 0.25                            |
| Non-Hispanic White                  | 1  | 1.08(0.92,1.27) 0.35   | 1.12(0.91,1.38) 0.28  | 1.06(0.86,1.31) 0.58 | 0.55                      |                                 |
| Non-Hispanic Black                  | 1  | 1.11(0.78,1.56) 0.57   | 0.83(0.55,1.26) 0.38  | 0.92(0.63,1.35) 0.69 | 0.42                      |                                 |
| Mexican American                    | 1  | 0.97(0.57,1.63) 0.90   | 1.04(0.56,1.93) 0.90  | 1.13(0.57,2.21) 0.73 | 0.69                      |                                 |
| Others                              | 1  | 0.89(0.45,1.75) 0.73   | 1.62(0.84,3.13) 0.15  | 1.05(0.52,2.11) 0.90 | 0.39                      |                                 |
| Education level                     |    |                        |                       |                      |                           | 0.57                            |
| Less than high school               | 1  | 1.13(0.87,1.46) 0.35   | 0.98(0.67,1.42) 0.91  | 0.98(0.69,1.37) 0.89 | 0.77                      |                                 |
| High school or equivalent           | 1  | 1.10(0.82,1.48) 0.53   | 1.24(0.91,1.70) 0.17  | 1.17(0.79,1.71) 0.43 | 0.32                      |                                 |
| College or above                    | 1  | 0.94(0.73,1.20) 0.62   | 1.08(0.81,1.44) 0.59  | 0.98(0.73,1.33) 0.92 | 0.82                      |                                 |
| Family income-poverty ratio         |    |                        |                       |                      |                           | 0.88                            |
| <1.0                                | 1  | 1.02(0.76,1.38) 0.89   | 1.19(0.81,1.75) 0.37  | 0.96(0.64,1.45) 0.86 | 0.80                      |                                 |
| 1.0-3.0                             | 1  | 1.07(0.87,1.32) 0.49   | 1.00(0.79,1.26) 0.97  | 1.00(0.74,1.36) 0.98 | 0.87                      |                                 |
| >3.0                                | 1  | 1.02(0.77,1.37) 0.87   | 1.20(0.88,1.64) 0.26  | 1.13(0.81,1.57) 0.48 | 0.32                      |                                 |
| Smoking status                      |    |                        |                       |                      |                           | 0.06                            |
| Never                               | 1  | 1.16(0.93,1.45) 0.19   | 1.28(1.00,1.64) 0.05  | 1.02(0.77,1.34) 0.89 | 0.63                      |                                 |
| Former                              | 1  | 1.04(0.83,1.29) 0.75   | 0.95(0.73,1.24) 0.72  | 1.07(0.81,1.42) 0.64 | 0.82                      |                                 |
| Current                             | 1  | 0.90(0.62,1.30) 0.56   | 1.13(0.76,1.68) 0.56  | 0.97(0.63,1.49) 0.90 | 0.79                      |                                 |
| Alcohol drinking                    |    |                        |                       |                      |                           | 0.19                            |
| Never                               | 1  | 1.30(1.05,1.61) 0.02   | 1.43(1.13,1.82) 0.003 | 1.14(0.83,1.58) 0.42 | 0.18                      |                                 |
| Low to moderate                     | 1  | 0.96(0.77,1.20) 0.72   | 0.93(0.71,1.23) 0.62  | 0.91(0.68,1.20) 0.49 | 0.50                      |                                 |
| Heavy                               | 1  | 0.92(0.66,1.30) 0.65   | 1.16(0.76,1.76) 0.49  | 1.16(0.79,1.70) 0.46 | 0.28                      |                                 |
| Healthy eating index score          |    |                        |                       |                      |                           | 0.94                            |
| Quarter 1                           | 1  | 1.10(0.78,1.54) 0.58   | 1.09(0.72,1.64) 0.69  | 1.00(0.65,1.55) 1.00 | 0.85                      |                                 |
| Quarter 2                           | 1  | 0.96(0.74,1.25) 0.75   | 0.98(0.69,1.38) 0.89  | 1.05(0.72,1.53) 0.78 | 0.82                      |                                 |
| Quarter 3                           | 1  | 1.14(0.82,1.59) 0.42   | 1.32(0.95,1.83) 0.10  | 1.07(0.77,1.50) 0.67 | 0.48                      |                                 |
| Quarter 4                           | 1  | 1.05(0.70,1.57) 0.82   | 1.06(0.70,1.58) 0.79  | 1.03(0.66,1.60) 0.91 | 0.96                      |                                 |
| Total energy intake from diet, kcal |    |                        |                       |                      |                           | 0.09                            |
| [0,1445.5]                          | 1  | 1.19(0.94,1.50) 0.14   | 1.21(0.89,1.65) 0.22  | 1.16(0.80,1.66) 0.44 | 0.17                      |                                 |
| (1445.5,1908]                       | 1  | 1.20(0.86,1.68) 0.29   | 1.13(0.81,1.57) 0.48  | 1.04(0.72,1.50) 0.85 | 0.83                      |                                 |
| (1908,2494.5]                       | 1  | 0.56(0.41,0.78) <0.001 | 0.85(0.60,1.19) 0.34  | 0.75(0.53,1.05) 0.09 | 0.89                      |                                 |
| (2494.5,15594]                      | 1  | 1.12(0.63,2.00) 0.70   | 1.08(0.60,1.95) 0.80  | 1.08(0.63,1.85) 0.78 | 0.97                      |                                 |
| Self reported health                |    |                        |                       |                      |                           | 0.16                            |
| Very good to excellent              | 1  | 1.01(0.78,1.31) 0.93   | 1.17(0.90,1.53) 0.25  | 0.99(0.72,1.36) 0.96 | 0.67                      |                                 |

|                                          |   |                      |                      |                      |      |
|------------------------------------------|---|----------------------|----------------------|----------------------|------|
| Good                                     | 1 | 1.08(0.85,1.39) 0.52 | 1.22(0.91,1.63) 0.18 | 1.19(0.90,1.57) 0.22 | 0.16 |
| Poor to fair                             | 1 | 0.98(0.75,1.27) 0.87 | 0.93(0.68,1.27) 0.65 | 0.90(0.64,1.25) 0.52 | 0.50 |
| Family history of cardiovascular disease |   |                      |                      |                      | 0.87 |
| No                                       | 1 | 1.08(0.91,1.29) 0.36 | 1.12(0.91,1.38) 0.28 | 1.09(0.88,1.35) 0.43 | 0.41 |
| Yes                                      | 1 | 1.05(0.76,1.45) 0.76 | 1.15(0.82,1.61) 0.42 | 1.03(0.72,1.47) 0.89 | 0.72 |
| Cardiovascular disease                   |   |                      |                      |                      | 0.48 |
| No                                       | 1 | 1.00(0.85,1.18) 0.96 | 1.05(0.85,1.30) 0.62 | 0.99(0.80,1.24) 0.96 | 0.91 |
| Yes                                      | 1 | 1.24(0.98,1.56) 0.07 | 1.32(1.00,1.73) 0.05 | 1.24(0.90,1.71) 0.19 | 0.18 |
| Chronic obstructive pulmonary diseases   |   |                      |                      |                      | 0.04 |
| No                                       | 1 | 1.02(0.89,1.18) 0.74 | 1.05(0.88,1.27) 0.59 | 1.03(0.85,1.25) 0.75 | 0.70 |
| Yes                                      | 1 | 1.18(0.71,1.97) 0.51 | 1.66(0.97,2.86) 0.07 | 1.00(0.56,1.78) 1.00 | 0.64 |
| History of chronic kidney disease        |   |                      |                      |                      | 0.21 |
| No                                       | 1 | 1.05(0.92,1.20) 0.50 | 1.12(0.93,1.34) 0.23 | 1.03(0.85,1.24) 0.76 | 0.60 |
| Yes                                      | 1 | 1.84(0.81,4.16) 0.14 | 0.83(0.37,1.89) 0.66 | 1.74(0.73,4.14) 0.21 | 0.50 |
| Cancer                                   |   |                      |                      |                      | 0.58 |
| No                                       | 1 | 1.04(0.90,1.21) 0.59 | 1.09(0.88,1.33) 0.43 | 0.97(0.79,1.19) 0.79 | 0.96 |
| Yes                                      | 1 | 1.22(0.86,1.72) 0.26 | 1.30(0.90,1.88) 0.16 | 1.44(0.99,2.11) 0.06 | 0.08 |
| <b>CVD mortality</b>                     |   |                      |                      |                      |      |
| Sex                                      |   |                      |                      |                      | 0.01 |
| Male                                     | 1 | 0.91(0.59,1.40) 0.68 | 1.25(0.83,1.87) 0.28 | 1.47(0.92,2.36) 0.11 | 0.03 |
| Female                                   | 1 | 1.28(0.95,1.73) 0.11 | 1.00(0.63,1.60) 0.99 | 0.82(0.47,1.43) 0.49 | 0.55 |
| Age, years                               |   |                      |                      |                      | 0.55 |
| <60                                      | 1 | 0.65(0.32,1.34) 0.25 | 1.02(0.46,2.27) 0.97 | 0.82(0.35,1.92) 0.65 | 0.96 |
| ≥60                                      | 1 | 1.14(0.89,1.46) 0.31 | 1.09(0.81,1.48) 0.57 | 1.33(0.93,1.90) 0.12 | 0.18 |
| BMI, kg/m2                               |   |                      |                      |                      | 0.36 |
| Normal weight (<25)                      | 1 | 0.96(0.63,1.48) 0.87 | 0.72(0.39,1.35) 0.31 | 1.20(0.65,2.20) 0.56 | 0.86 |
| Overweight (25-30)                       | 1 | 0.84(0.49,1.42) 0.51 | 1.24(0.83,1.85) 0.30 | 1.22(0.70,2.10) 0.48 | 0.21 |
| Obesity (≥30)                            | 1 | 1.48(0.85,2.58) 0.17 | 1.40(0.83,2.34) 0.21 | 1.39(0.71,2.71) 0.34 | 0.32 |
| Race                                     |   |                      |                      |                      | 0.69 |
| Non-Hispanic White                       | 1 | 1.11(0.83,1.47) 0.49 | 1.08(0.78,1.50) 0.63 | 1.24(0.85,1.82) 0.27 | 0.32 |
| Non-Hispanic Black                       | 1 | 1.05(0.53,2.08) 0.89 | 0.90(0.41,1.98) 0.79 | 1.02(0.45,2.33) 0.96 | 0.93 |
| Mexican American                         | 1 | 1.01(0.38,2.73) 0.98 | 0.67(0.17,2.69) 0.57 | 1.98(0.73,5.34) 0.18 | 0.30 |
| Others                                   | 1 | 0.63(0.18,2.22) 0.47 | 1.23(0.33,4.66) 0.76 | 0.73(0.16,3.34) 0.68 | 0.94 |
| Education level                          |   |                      |                      |                      | 0.13 |
| Less than high school                    | 1 | 1.44(0.94,2.18) 0.09 | 0.84(0.47,1.50) 0.55 | 1.37(0.76,2.46) 0.29 | 0.69 |
| High school or equivalent                | 1 | 0.86(0.50,1.49) 0.60 | 1.71(0.97,3.00) 0.06 | 1.42(0.68,2.98) 0.35 | 0.12 |
| College or above                         | 1 | 0.99(0.64,1.53) 0.97 | 0.95(0.59,1.53) 0.85 | 1.06(0.65,1.72) 0.82 | 0.85 |
| Family income-poverty ratio              |   |                      |                      |                      | 0.84 |
| <1.0                                     | 1 | 1.14(0.64,2.03) 0.65 | 1.00(0.55,1.80) 0.99 | 1.14(0.59,2.20) 0.69 | 0.78 |
| 1.0-3.0                                  | 1 | 1.10(0.78,1.56) 0.57 | 1.00(0.67,1.51) 0.99 | 1.24(0.78,1.98) 0.36 | 0.51 |
| >3.0                                     | 1 | 0.82(0.49,1.38) 0.46 | 1.04(0.58,1.85) 0.89 | 1.10(0.61,1.98) 0.76 | 0.48 |
| Smoking status                           |   |                      |                      |                      | 0.15 |
| Never                                    | 1 | 1.20(0.87,1.64) 0.26 | 1.20(0.82,1.76) 0.35 | 1.00(0.63,1.59) 0.99 | 0.94 |
| Former                                   | 1 | 0.87(0.52,1.45) 0.58 | 0.94(0.56,1.59) 0.82 | 1.13(0.65,1.97) 0.66 | 0.54 |
| Current                                  | 1 | 1.18(0.65,2.14) 0.60 | 1.18(0.62,2.25) 0.62 | 2.05(1.04,4.03) 0.04 | 0.07 |
| Alcohol drinking                         |   |                      |                      |                      | 0.11 |
| Never                                    | 1 | 1.34(0.92,1.97) 0.13 | 1.53(0.99,2.35) 0.05 | 1.05(0.58,1.88) 0.88 | 0.55 |

|                                          |   |                  |      |                  |      |                 |      |      |
|------------------------------------------|---|------------------|------|------------------|------|-----------------|------|------|
| Low to moderate                          | 1 | 0.97(0.64,1.47)  | 0.88 | 0.83(0.49,1.42)  | 0.50 | 1.11(0.65,1.90) | 0.71 | 0.86 |
| Heavy                                    | 1 | 0.67(0.31,1.43)  | 0.30 | 1.20(0.63,2.31)  | 0.58 | 1.60(0.73,3.48) | 0.24 | 0.07 |
| Healthy eating index score               |   |                  |      |                  |      |                 |      | 0.95 |
| Quarter 1                                | 1 | 0.76(0.42,1.36)  | 0.36 | 0.88(0.39,1.98)  | 0.75 | 1.69(0.69,4.17) | 0.25 | 0.59 |
| Quarter 2                                | 1 | 1.21(0.72,2.02)  | 0.48 | 1.21(0.63,2.34)  | 0.56 | 1.23(0.73,2.07) | 0.43 | 0.46 |
| Quarter 3                                | 1 | 0.92(0.56,1.53)  | 0.76 | 1.09(0.64,1.86)  | 0.76 | 1.17(0.65,2.11) | 0.61 | 0.47 |
| Quarter 4                                | 1 | 1.41(0.79,2.52)  | 0.25 | 1.24(0.65,2.40)  | 0.51 | 1.37(0.68,2.78) | 0.38 | 0.60 |
| Total energy intake from diet, kcal      |   |                  |      |                  |      |                 |      | 0.37 |
| [0,1445.5]                               | 1 | 1.45(1.01,2.09)  | 0.05 | 1.05(0.65,1.70)  | 0.83 | 1.23(0.67,2.26) | 0.50 | 0.43 |
| (1445.5,1908]                            | 1 | 0.86(0.55,1.34)  | 0.50 | 0.93(0.54,1.58)  | 0.78 | 1.25(0.71,2.19) | 0.43 | 0.53 |
| (1908,2494.5]                            | 1 | 0.57(0.27,1.20)  | 0.14 | 0.93(0.52,1.67)  | 0.80 | 0.99(0.51,1.91) | 0.97 | 0.39 |
| (2494.5,15594]                           | 1 | 1.21(0.36,4.08)  | 0.76 | 1.44(0.47,4.44)  | 0.52 | 1.20(0.40,3.63) | 0.75 | 0.99 |
| Self reported health                     |   |                  |      |                  |      |                 |      | 0.09 |
| Very good to excellent                   | 1 | 1.02(0.60,1.72)  | 0.94 | 1.29(0.79,2.10)  | 0.30 | 1.45(0.78,2.72) | 0.24 | 0.13 |
| Good                                     | 1 | 0.83(0.53,1.29)  | 0.41 | 0.94(0.58,1.52)  | 0.79 | 1.02(0.60,1.74) | 0.95 | 0.80 |
| Poor to fair                             | 1 | 1.10(0.69,1.76)  | 0.69 | 0.96(0.56,1.65)  | 0.88 | 1.03(0.55,1.91) | 0.93 | 0.95 |
| Family history of cardiovascular disease |   |                  |      |                  |      |                 |      | 0.23 |
| No                                       | 1 | 1.16(0.85,1.59)  | 0.36 | 1.04(0.73,1.48)  | 0.84 | 1.40(0.98,2.00) | 0.07 | 0.13 |
| Yes                                      | 1 | 0.85(0.55,1.31)  | 0.46 | 1.17(0.66,2.06)  | 0.59 | 0.84(0.41,1.74) | 0.65 | 1    |
| Cardiovascular disease                   |   |                  |      |                  |      |                 |      | 0.39 |
| No                                       | 1 | 0.98(0.69,1.39)  | 0.90 | 0.84(0.56,1.26)  | 0.40 | 1.03(0.66,1.60) | 0.90 | 0.89 |
| Yes                                      | 1 | 1.29(0.81,2.05)  | 0.29 | 1.67(1.08,2.58)  | 0.02 | 1.78(1.07,2.97) | 0.03 | 0.01 |
| Chronic obstructive pulmonary diseases   |   |                  |      |                  |      |                 |      | 0.83 |
| No                                       | 1 | 1.04(0.80,1.35)  | 0.78 | 1.08(0.80,1.45)  | 0.62 | 1.18(0.85,1.65) | 0.32 | 0.31 |
| Yes                                      | 1 | 1.76(0.57,5.45)  | 0.33 | 1.55(0.51,4.73)  | 0.44 | 2.36(0.73,7.60) | 0.15 | 0.21 |
| History of chronic kidney disease        |   |                  |      |                  |      |                 |      | 0.09 |
| No                                       | 1 | 1.03(0.80,1.33)  | 0.81 | 1.03(0.75,1.42)  | 0.86 | 1.18(0.83,1.70) | 0.36 | 0.40 |
| Yes                                      | 1 | 2.24(0.46,10.80) | 0.31 | 1.89(0.32,11.03) | 0.48 | 1.89(0.40,8.99) | 0.42 | 0.60 |
| Cancer                                   |   |                  |      |                  |      |                 |      | 0.07 |
| No                                       | 1 | 1.05(0.79,1.38)  | 0.75 | 1.12(0.79,1.59)  | 0.53 | 1.08(0.71,1.64) | 0.72 | 0.63 |
| Yes                                      | 1 | 1.39(0.71,2.70)  | 0.33 | 0.98(0.50,1.93)  | 0.96 | 2.09(1.04,4.22) | 0.04 | 0.09 |
| <b>Cancer mortality</b>                  |   |                  |      |                  |      |                 |      |      |
| Sex                                      |   |                  |      |                  |      |                 |      | 0.74 |
| Male                                     | 1 | 0.80(0.51,1.26)  | 0.34 | 0.75(0.48,1.19)  | 0.23 | 0.68(0.41,1.13) | 0.14 | 0.15 |
| Female                                   | 1 | 0.67(0.43,1.04)  | 0.07 | 0.91(0.59,1.40)  | 0.66 | 0.83(0.47,1.45) | 0.52 | 0.64 |
| Age, years                               |   |                  |      |                  |      |                 |      | 0.32 |
| <60                                      | 1 | 0.50(0.25,0.99)  | 0.05 | 0.51(0.27,0.97)  | 0.04 | 0.42(0.20,0.90) | 0.03 | 0.04 |
| ≥60                                      | 1 | 0.92(0.67,1.26)  | 0.61 | 1.06(0.74,1.52)  | 0.74 | 0.99(0.70,1.41) | 0.97 | 0.79 |
| BMI, kg/m2                               |   |                  |      |                  |      |                 |      | 0.14 |
| Normal weight (<25)                      | 1 | 0.63(0.35,1.14)  | 0.13 | 1.11(0.62,1.98)  | 0.73 | 0.74(0.37,1.48) | 0.39 | 0.75 |
| Overweight (25-30)                       | 1 | 1.26(0.73,2.17)  | 0.41 | 1.14(0.60,2.15)  | 0.69 | 1.21(0.60,2.44) | 0.60 | 0.76 |
| Obesity (≥30)                            | 1 | 0.52(0.31,0.89)  | 0.02 | 0.50(0.30,0.85)  | 0.01 | 0.42(0.23,0.80) | 0.01 | 0.01 |
| Race                                     |   |                  |      |                  |      |                 |      | 0.52 |
| Non-Hispanic White                       | 1 | 0.79(0.55,1.14)  | 0.21 | 0.84(0.59,1.20)  | 0.34 | 0.71(0.46,1.08) | 0.11 | 0.16 |
| Non-Hispanic Black                       | 1 | 0.59(0.28,1.23)  | 0.16 | 0.55(0.25,1.21)  | 0.14 | 0.80(0.32,1.96) | 0.62 | 0.51 |
| Mexican American                         | 1 | 0.46(0.19,1.11)  | 0.08 | 0.50(0.22,1.14)  | 0.10 | 0.30(0.08,1.08) | 0.07 | 0.06 |
| Others                                   | 1 | 0.75(0.19,2.95)  | 0.68 | 2.42(0.80,7.38)  | 0.12 | 1.70(0.51,5.71) | 0.39 | 0.14 |





|                                          |   |                        |                       |                      |      |
|------------------------------------------|---|------------------------|-----------------------|----------------------|------|
| Male                                     | 1 | 1.47(1.01,2.14) 0.05   | 1.35(0.90,2.02) 0.15  | 1.20(0.79,1.82) 0.40 | 0.79 |
| Female                                   | 1 | 1.26(0.93,1.72) 0.14   | 1.55(1.10,2.19) 0.01  | 1.19(0.80,1.77) 0.38 | 0.09 |
| Age, years                               |   |                        |                       |                      | 0.38 |
| <60                                      | 1 | 1.58(0.89,2.80) 0.12   | 2.31(1.23,4.36) 0.01  | 1.69(0.97,2.94) 0.06 | 0.05 |
| ≥60                                      | 1 | 1.18(0.92,1.53) 0.20   | 1.16(0.85,1.58) 0.35  | 1.02(0.72,1.44) 0.93 | 0.91 |
| BMI, kg/m <sup>2</sup>                   |   |                        |                       |                      | 0.08 |
| Normal weight (<25)                      | 1 | 1.44(0.98,2.12) 0.06   | 1.27(0.87,1.86) 0.21  | 1.15(0.71,1.84) 0.57 | 0.60 |
| Overweight (25-30)                       | 1 | 1.07(0.70,1.62) 0.76   | 1.72(1.10,2.69) 0.02  | 1.01(0.63,1.62) 0.97 | 0.44 |
| Obesity (≥30)                            | 1 | 1.45(1.00,2.09) 0.05   | 1.15(0.71,1.85) 0.57  | 1.31(0.83,2.05) 0.24 | 0.53 |
| Race                                     |   |                        |                       |                      | 0.83 |
| Non-Hispanic White                       | 1 | 1.27(0.96,1.69) 0.09   | 1.39(1.00,1.92) 0.05  | 1.20(0.86,1.68) 0.28 | 0.23 |
| Non-Hispanic Black                       | 1 | 1.61(0.99,2.62) 0.05   | 1.06(0.55,2.05) 0.86  | 0.94(0.50,1.77) 0.84 | 0.63 |
| Mexican American                         | 1 | 1.49(0.66,3.36) 0.34   | 1.89(0.68,5.28) 0.23  | 1.89(0.64,5.64) 0.25 | 0.21 |
| Others                                   | 1 | 1.09(0.46,2.56) 0.84   | 1.40(0.56,3.49) 0.47  | 0.87(0.37,2.05) 0.74 | 0.97 |
| Education level                          |   |                        |                       |                      | 0.64 |
| Less than high school                    | 1 | 1.35(0.92,1.96) 0.12   | 1.21(0.75,1.96) 0.43  | 0.91(0.57,1.44) 0.68 | 0.91 |
| High school or equivalent                | 1 | 1.39(0.93,2.08) 0.11   | 1.10(0.69,1.77) 0.69  | 1.14(0.69,1.89) 0.60 | 0.85 |
| College or above                         | 1 | 1.18(0.76,1.83) 0.47   | 1.69(1.09,2.61) 0.02  | 1.37(0.85,2.20) 0.20 | 0.11 |
| Family income-poverty ratio              |   |                        |                       |                      | 0.79 |
| <1.0                                     | 1 | 1.38(0.88,2.16) 0.17   | 1.78(1.01,3.16) 0.05  | 1.42(0.77,2.61) 0.26 | 0.09 |
| 1.0-3.0                                  | 1 | 1.23(0.91,1.66) 0.18   | 1.06(0.74,1.51) 0.77  | 0.95(0.60,1.51) 0.83 | 0.66 |
| >3.0                                     | 1 | 1.35(0.79,2.30) 0.28   | 1.82(1.08,3.06) 0.03  | 1.55(0.88,2.72) 0.13 | 0.07 |
| <b>Smoking status</b>                    |   |                        |                       |                      | 0.05 |
| Never                                    | 1 | 1.30(0.90,1.87) 0.17   | 1.54(1.01,2.34) 0.04  | 1.21(0.81,1.82) 0.35 | 0.24 |
| Former                                   | 1 | 1.20(0.85,1.68) 0.30   | 1.02(0.71,1.46) 0.93  | 1.09(0.75,1.59) 0.66 | 0.94 |
| Current                                  | 1 | 1.42(0.89,2.27) 0.14   | 1.89(1.00,3.55) 0.05  | 1.18(0.64,2.15) 0.60 | 0.38 |
| Alcohol drinking                         |   |                        |                       |                      | 0.23 |
| Never                                    | 1 | 1.84(1.27,2.66) 0.001  | 1.78(1.17,2.70) 0.01  | 1.34(0.84,2.14) 0.22 | 0.16 |
| Low to moderate                          | 1 | 0.95(0.67,1.34) 0.76   | 1.09(0.75,1.59) 0.64  | 0.98(0.66,1.45) 0.91 | 0.88 |
| Heavy                                    | 1 | 1.25(0.67,2.31) 0.49   | 1.53(0.74,3.15) 0.25  | 1.26(0.66,2.41) 0.49 | 0.45 |
| Healthy eating index score               |   |                        |                       |                      | 0.76 |
| Quarter 1                                | 1 | 1.53(0.91,2.57) 0.11   | 1.57(0.90,2.75) 0.12  | 1.45(0.73,2.86) 0.28 | 0.16 |
| Quarter 2                                | 1 | 1.24(0.85,1.80) 0.26   | 1.22(0.80,1.85) 0.35  | 0.98(0.54,1.76) 0.94 | 0.91 |
| Quarter 3                                | 1 | 1.48(0.90,2.44) 0.12   | 1.63(0.98,2.71) 0.06  | 0.99(0.54,1.79) 0.96 | 0.85 |
| Quarter 4                                | 1 | 1.12(0.65,1.92) 0.69   | 1.24(0.77,1.99) 0.38  | 1.29(0.73,2.26) 0.38 | 0.33 |
| Total energy intake from diet, kcal      |   |                        |                       |                      | 0.06 |
| [0,1445.5]                               | 1 | 1.20(0.87,1.66) 0.27   | 1.74(1.14,2.65) 0.01  | 0.96(0.51,1.84) 0.91 | 0.09 |
| (1445.5,1908]                            | 1 | 2.31(1.50,3.58) <0.001 | 1.71(1.08,2.68) 0.02  | 1.22(0.68,2.17) 0.51 | 0.52 |
| (1908,2494.5]                            | 1 | 0.54(0.32,0.91) 0.02   | 0.80(0.45,1.42) 0.44  | 0.67(0.40,1.15) 0.15 | 0.68 |
| (2494.5,15594]                           | 1 | 0.95(0.41,2.18) 0.90   | 1.00(0.41,2.47) 1.00  | 1.15(0.52,2.56) 0.73 | 0.53 |
| Self reported health                     |   |                        |                       |                      | 0.32 |
| Very good to excellent                   | 1 | 1.24(0.86,1.78) 0.25   | 1.30(0.87,1.94) 0.20  | 0.89(0.55,1.45) 0.65 | 0.97 |
| Good                                     | 1 | 1.50(1.06,2.13) 0.02   | 1.96(1.25,3.08) 0.003 | 1.67(1.10,2.52) 0.02 | 0.01 |
| Poor to fair                             | 1 | 1.11(0.74,1.68) 0.61   | 1.02(0.63,1.63) 0.94  | 1.04(0.62,1.75) 0.88 | 0.99 |
| Family history of cardiovascular disease |   |                        |                       |                      | 0.99 |
| No                                       | 1 | 1.34(1.01,1.77) 0.04   | 1.43(1.04,1.98) 0.03  | 1.25(0.88,1.78) 0.21 | 0.18 |
| Yes                                      | 1 | 1.25(0.76,2.06) 0.38   | 1.34(0.80,2.27) 0.27  | 1.08(0.64,1.82) 0.77 | 0.65 |

|                                        |   |                       |                       |                       |      |  |      |
|----------------------------------------|---|-----------------------|-----------------------|-----------------------|------|--|------|
| Cardiovascular disease                 |   |                       |                       |                       |      |  | 0.90 |
| No                                     | 1 | 1.31(0.99,1.72) 0.06  | 1.45(1.05,2.00) 0.02  | 1.23(0.91,1.65) 0.18  | 0.16 |  |      |
| Yes                                    | 1 | 1.34(0.91,1.97) 0.13  | 1.31(0.84,2.06) 0.24  | 1.05(0.63,1.77) 0.85  | 0.81 |  |      |
| Chronic obstructive pulmonary diseases |   |                       |                       |                       |      |  | 0.01 |
| No                                     | 1 | 1.21(0.95,1.55) 0.13  | 1.21(0.91,1.63) 0.19  | 1.11(0.82,1.51) 0.50  | 0.52 |  |      |
| Yes                                    | 1 | 2.01(1.00,4.02) 0.05  | 3.12(1.52,6.42) 0.002 | 1.59(0.75,3.38) 0.23  | 0.07 |  |      |
| History of chronic kidney disease      |   |                       |                       |                       |      |  | 0.18 |
| No                                     | 1 | 1.27(1.00,1.61) 0.05  | 1.40(1.06,1.86) 0.02  | 1.14(0.85,1.52) 0.39  | 0.28 |  |      |
| Yes                                    | 1 | 2.93(0.77,11.21) 0.12 | 0.89(0.25,3.15) 0.86  | 3.09(0.58,16.29) 0.18 | 0.38 |  |      |
| Cancer                                 |   |                       |                       |                       |      |  | 0.99 |
| No                                     | 1 | 1.30(1.03,1.65) 0.03  | 1.34(0.99,1.82) 0.06  | 1.16(0.85,1.58) 0.34  | 0.32 |  |      |
| Yes                                    | 1 | 1.39(0.78,2.48) 0.26  | 1.54(0.90,2.64) 0.12  | 1.28(0.70,2.33) 0.42  | 0.39 |  |      |

Adjusted for sex, age, race, BMI, educational level, smoking status, drinking status, family income poverty ratio, healthy eating index-2015, total energy intake from the diet, self-reported health status, family history of cardiovascular diseases, self-reported cardiovascular disease, self-reported chronic obstructive pulmonary disease, self-reported chronic kidney disease, and self-reported cancer.

**Supplementary Table 2.6** Subgroup analysis of hazard ratios for folate levels with all-cause and CVD mortality in participants with prediabetes from NHANES 1999-2018

|                                     | Q1 | Q2                   | Q3                   | Q4                   | <i>P</i> <sub>trend</sub> | <i>P</i> <sub>interaction</sub> |
|-------------------------------------|----|----------------------|----------------------|----------------------|---------------------------|---------------------------------|
| <b>All-cause mortality</b>          |    |                      |                      |                      |                           |                                 |
| Sex                                 |    |                      |                      |                      |                           | 0.99                            |
| Male                                | 1  | 1.03(0.81,1.29) 0.83 | 1.11(0.88,1.40) 0.39 | 1.00(0.78,1.29) 0.99 | 0.87                      |                                 |
| Female                              | 1  | 1.07(0.88,1.30) 0.49 | 1.15(0.91,1.45) 0.25 | 1.02(0.76,1.36) 0.91 | 0.64                      |                                 |
| Age, years                          |    |                      |                      |                      |                           | 0.02                            |
| <60                                 | 1  | 0.82(0.55,1.21) 0.31 | 1.43(0.99,2.07) 0.06 | 0.98(0.67,1.45) 0.93 | 0.37                      |                                 |
| ≥60                                 | 1  | 1.07(0.91,1.26) 0.41 | 0.98(0.83,1.17) 0.83 | 0.98(0.80,1.21) 0.88 | 0.63                      |                                 |
| BMI, kg/m <sup>2</sup>              |    |                      |                      |                      |                           | 0.40                            |
| Normal weight (<25)                 | 1  | 1.32(1.01,1.73) 0.04 | 1.31(0.98,1.75) 0.07 | 1.32(0.92,1.87) 0.13 | 0.14                      |                                 |
| Overweight (25-30)                  | 1  | 1.00(0.80,1.27) 0.97 | 1.14(0.88,1.48) 0.33 | 1.10(0.80,1.51) 0.55 | 0.43                      |                                 |
| Obesity (≥30)                       | 1  | 0.90(0.70,1.17) 0.43 | 0.96(0.72,1.29) 0.78 | 0.72(0.52,1.01) 0.06 | 0.11                      |                                 |
| Race                                |    |                      |                      |                      |                           | 0.95                            |
| Non-Hispanic White                  | 1  | 1.05(0.89,1.24) 0.54 | 1.10(0.93,1.31) 0.27 | 1.02(0.82,1.26) 0.86 | 0.75                      |                                 |
| Non-Hispanic Black                  | 1  | 1.10(0.74,1.64) 0.64 | 1.24(0.86,1.80) 0.25 | 1.05(0.70,1.56) 0.83 | 0.51                      |                                 |
| Mexican American                    | 1  | 0.95(0.54,1.65) 0.85 | 0.91(0.50,1.66) 0.77 | 0.61(0.35,1.06) 0.08 | 0.08                      |                                 |
| Others                              | 1  | 0.80(0.44,1.43) 0.45 | 0.88(0.46,1.69) 0.70 | 0.82(0.38,1.79) 0.62 | 0.73                      |                                 |
| Education level                     |    |                      |                      |                      |                           | 0.66                            |
| Less than high school               | 1  | 1.02(0.81,1.29) 0.86 | 1.11(0.82,1.49) 0.50 | 0.98(0.72,1.35) 0.92 | 0.88                      |                                 |
| High school or equivalent           | 1  | 1.12(0.82,1.53) 0.49 | 1.18(0.86,1.60) 0.30 | 1.20(0.78,1.86) 0.40 | 0.33                      |                                 |
| College or above                    | 1  | 0.99(0.77,1.28) 0.94 | 1.03(0.80,1.32) 0.84 | 0.86(0.64,1.17) 0.34 | 0.35                      |                                 |
| Family income-poverty ratio         |    |                      |                      |                      |                           | 0.33                            |
| <1.0                                | 1  | 1.40(0.97,2.04) 0.07 | 0.99(0.67,1.46) 0.96 | 1.29(0.91,1.82) 0.16 | 0.43                      |                                 |
| 1.0-3.0                             | 1  | 0.93(0.75,1.14) 0.47 | 1.04(0.83,1.31) 0.70 | 0.88(0.66,1.17) 0.37 | 0.62                      |                                 |
| >3.0                                | 1  | 1.06(0.77,1.45) 0.74 | 1.23(0.90,1.67) 0.20 | 1.08(0.79,1.48) 0.64 | 0.47                      |                                 |
| Smoking status                      |    |                      |                      |                      |                           | 0.02                            |
| Never                               | 1  | 0.98(0.76,1.26) 0.87 | 1.13(0.87,1.46) 0.37 | 0.93(0.71,1.22) 0.60 | 0.91                      |                                 |
| Former                              | 1  | 1.14(0.91,1.44) 0.26 | 0.95(0.75,1.19) 0.65 | 0.97(0.75,1.25) 0.81 | 0.38                      |                                 |
| Current                             | 1  | 0.92(0.65,1.30) 0.64 | 1.32(0.92,1.90) 0.13 | 1.09(0.71,1.69) 0.68 | 0.33                      |                                 |
| Alcohol drinking                    |    |                      |                      |                      |                           | 0.87                            |
| Never                               | 1  | 0.95(0.76,1.18) 0.62 | 1.12(0.85,1.46) 0.42 | 0.95(0.70,1.27) 0.72 | 0.88                      |                                 |
| Low to moderate                     | 1  | 1.05(0.82,1.36) 0.68 | 1.11(0.85,1.44) 0.45 | 1.02(0.75,1.38) 0.91 | 0.85                      |                                 |
| Heavy                               | 1  | 1.14(0.77,1.68) 0.51 | 1.14(0.79,1.65) 0.48 | 1.02(0.71,1.48) 0.90 | 0.93                      |                                 |
| Healthy eating index score          |    |                      |                      |                      |                           | 0.65                            |
| Quarter 1                           | 1  | 1.06(0.77,1.46) 0.70 | 1.01(0.71,1.44) 0.96 | 1.10(0.76,1.61) 0.61 | 0.71                      |                                 |
| Quarter 2                           | 1  | 1.21(0.88,1.67) 0.24 | 1.14(0.81,1.59) 0.46 | 0.99(0.64,1.54) 0.97 | 0.96                      |                                 |
| Quarter 3                           | 1  | 1.07(0.80,1.43) 0.65 | 1.17(0.83,1.64) 0.37 | 1.19(0.83,1.70) 0.34 | 0.29                      |                                 |
| Quarter 4                           | 1  | 0.84(0.60,1.16) 0.29 | 0.99(0.69,1.40) 0.94 | 0.76(0.54,1.08) 0.13 | 0.21                      |                                 |
| Total energy intake from diet, kcal |    |                      |                      |                      |                           | 0.92                            |
| [0,1445.5]                          | 1  | 1.03(0.82,1.28) 0.82 | 0.98(0.74,1.31) 0.91 | 0.95(0.70,1.30) 0.76 | 0.82                      |                                 |
| (1445.5,1908]                       | 1  | 1.03(0.75,1.40) 0.86 | 1.09(0.81,1.48) 0.56 | 1.04(0.74,1.46) 0.82 | 0.69                      |                                 |
| (1908,2494.5]                       | 1  | 1.14(0.80,1.65) 0.47 | 1.47(1.02,2.13) 0.04 | 1.28(0.85,1.93) 0.24 | 0.18                      |                                 |
| (2494.5,15594]                      | 1  | 0.93(0.50,1.75) 0.83 | 0.94(0.50,1.77) 0.85 | 0.87(0.52,1.45) 0.58 | 0.50                      |                                 |
| Self reported health                |    |                      |                      |                      |                           | 0.02                            |
| Very good to excellent              | 1  | 1.26(0.96,1.65) 0.09 | 1.40(1.02,1.91) 0.04 | 1.00(0.71,1.40) 0.98 | 0.62                      |                                 |

|                                          |   |                       |                      |                      |      |
|------------------------------------------|---|-----------------------|----------------------|----------------------|------|
| Good                                     | 1 | 1.04(0.80,1.37) 0.75  | 1.09(0.82,1.44) 0.55 | 1.01(0.73,1.40) 0.93 | 0.84 |
| Poor to fair                             | 1 | 0.84(0.62,1.13) 0.25  | 0.89(0.67,1.17) 0.39 | 0.93(0.67,1.29) 0.66 | 0.81 |
| Family history of cardiovascular disease |   |                       |                      |                      | 0.46 |
| No                                       | 1 | 1.09(0.91,1.30) 0.33  | 1.12(0.92,1.35) 0.25 | 1.11(0.87,1.40) 0.39 | 0.38 |
| Yes                                      | 1 | 0.90(0.67,1.21) 0.50  | 1.06(0.74,1.53) 0.74 | 0.75(0.53,1.07) 0.11 | 0.28 |
| Cardiovascular disease                   |   |                       |                      |                      | 0.22 |
| No                                       | 1 | 0.94(0.80,1.11) 0.48  | 0.99(0.82,1.19) 0.88 | 0.90(0.74,1.11) 0.32 | 0.46 |
| Yes                                      | 1 | 1.19(0.92,1.54) 0.17  | 1.42(1.09,1.86) 0.01 | 1.27(0.94,1.71) 0.13 | 0.06 |
| Chronic obstructive pulmonary diseases   |   |                       |                      |                      | 0.28 |
| No                                       | 1 | 1.04(0.89,1.20) 0.63  | 1.14(0.97,1.34) 0.10 | 0.99(0.82,1.20) 0.94 | 0.73 |
| Yes                                      | 1 | 0.89(0.57,1.39) 0.60  | 0.73(0.43,1.23) 0.24 | 0.97(0.58,1.63) 0.90 | 0.69 |
| History of chronic kidney disease        |   |                       |                      |                      | 0.46 |
| No                                       | 1 | 1.04(0.89,1.20) 0.65  | 1.11(0.94,1.31) 0.21 | 1.02(0.84,1.24) 0.81 | 0.62 |
| Yes                                      | 1 | 1.08(0.36,3.24) 0.89  | 0.87(0.31,2.40) 0.78 | 0.39(0.10,1.54) 0.18 | 0.13 |
| Cancer                                   |   |                       |                      |                      | 0.01 |
| No                                       | 1 | 0.92(0.79,1.07) 0.27  | 1.06(0.89,1.28) 0.51 | 0.90(0.72,1.12) 0.34 | 0.72 |
| Yes                                      | 1 | 1.82(1.25,2.65) 0.002 | 1.53(1.03,2.27) 0.04 | 1.73(1.17,2.57) 0.01 | 0.06 |
| <b>CVD mortality</b>                     |   |                       |                      |                      |      |
| Sex                                      |   |                       |                      |                      | 0.74 |
| Male                                     | 1 | 1.23(0.82,1.84) 0.33  | 1.32(0.86,2.02) 0.20 | 1.29(0.82,2.01) 0.27 | 0.30 |
| Female                                   | 1 | 1.03(0.72,1.46) 0.88  | 1.23(0.83,1.83) 0.30 | 0.87(0.53,1.43) 0.58 | 1    |
| Age, years                               |   |                       |                      |                      | 0.58 |
| <60                                      | 1 | 0.73(0.30,1.78) 0.49  | 1.20(0.57,2.53) 0.62 | 0.93(0.39,2.19) 0.87 | 0.80 |
| ≥60                                      | 1 | 1.16(0.89,1.51) 0.28  | 1.22(0.89,1.68) 0.22 | 1.16(0.83,1.62) 0.39 | 0.37 |
| BMI, kg/m2                               |   |                       |                      |                      | 0.93 |
| Normal weight (<25)                      | 1 | 1.24(0.74,2.08) 0.42  | 1.41(0.82,2.45) 0.22 | 1.49(0.72,3.07) 0.28 | 0.22 |
| Overweight (25-30)                       | 1 | 0.89(0.56,1.43) 0.64  | 0.98(0.67,1.42) 0.91 | 0.97(0.60,1.55) 0.89 | 0.99 |
| Obesity (≥30)                            | 1 | 1.15(0.71,1.86) 0.56  | 1.33(0.81,2.18) 0.27 | 1.01(0.57,1.80) 0.96 | 0.71 |
| Race                                     |   |                       |                      |                      | 0.80 |
| Non-Hispanic White                       | 1 | 1.12(0.80,1.56) 0.52  | 1.23(0.87,1.72) 0.24 | 1.10(0.75,1.63) 0.62 | 0.53 |
| Non-Hispanic Black                       | 1 | 0.80(0.39,1.65) 0.55  | 1.35(0.70,2.62) 0.37 | 1.07(0.53,2.17)0.84  | 0.51 |
| Mexican American                         | 1 | 1.53(0.55,4.20) 0.41  | 1.80(0.65,4.97) 0.26 | 1.15(0.37,3.57)0.80  | 0.73 |
| Others                                   | 1 | 1.50(0.53,4.27) 0.45  | 0.73(0.18,2.91) 0.65 | 1.48(0.24,9.11) 0.67 | 0.92 |
| Education level                          |   |                       |                      |                      | 0.23 |
| Less than high school                    | 1 | 1.03(0.69,1.54) 0.89  | 1.22(0.80,1.85) 0.37 | 1.23(0.72,2.11) 0.45 | 0.35 |
| High school or equivalent                | 1 | 1.49(0.81,2.74) 0.19  | 2.22(1.25,3.95) 0.01 | 1.89(0.86,4.15) 0.11 | 0.02 |
| College or above                         | 1 | 0.94(0.61,1.47) 0.80  | 0.84(0.51,1.38) 0.49 | 0.76(0.46,1.27) 0.29 | 0.24 |
| Family income-poverty ratio              |   |                       |                      |                      | 0.16 |
| <1.0                                     | 1 | 1.50(0.96,2.35) 0.08  | 0.92(0.52,1.64) 0.78 | 1.43(0.78,2.63) 0.25 | 0.56 |
| 1.0-3.0                                  | 1 | 1.06(0.73,1.54) 0.76  | 1.49(1.05,2.11) 0.03 | 1.30(0.83,2.04) 0.25 | 0.06 |
| >3.0                                     | 1 | 0.88(0.50,1.53) 0.64  | 0.93(0.50,1.73) 0.82 | 0.71(0.40,1.29) 0.26 | 0.35 |
| Smoking status                           |   |                       |                      |                      | 0.53 |
| Never                                    | 1 | 1.13(0.83,1.53) 0.44  | 1.34(0.93,1.92) 0.11 | 0.91(0.60,1.38) 0.65 | 0.97 |
| Former                                   | 1 | 1.03(0.62,1.71) 0.90  | 0.92(0.55,1.55) 0.76 | 1.07(0.62,1.84) 0.82 | 0.96 |
| Current                                  | 1 | 1.02(0.48,2.20) 0.95  | 1.51(0.78,2.92) 0.22 | 1.53(0.66,3.54) 0.32 | 0.20 |
| Alcohol drinking                         |   |                       |                      |                      | 0.91 |
| Never                                    | 1 | 1.09(0.75,1.60) 0.64  | 1.28(0.83,1.99) 0.27 | 1.10(0.65,1.83) 0.73 | 0.54 |

|                                          |   |                      |                                |                               |      |
|------------------------------------------|---|----------------------|--------------------------------|-------------------------------|------|
| Low to moderate                          | 1 | 0.96(0.63,1.46) 0.86 | 1.22(0.76,1.96) 0.42           | 0.99(0.59,1.67) 0.98          | 0.75 |
| Heavy                                    | 1 | 1.52(0.67,3.44) 0.31 | 1.35(0.67,2.73) 0.39           | 1.28(0.56,2.92) 0.56          | 0.7  |
| Healthy eating index score               |   |                      |                                |                               | 0.64 |
| Quarter 1                                | 1 | 0.97(0.55,1.70) 0.91 | 1.43(0.84,2.45) 0.19           | 1.06(0.41,2.75) 0.91          | 0.45 |
| Quarter 2                                | 1 | 1.45(0.79,2.64) 0.23 | 1.26(0.70,2.28) 0.44           | 1.10(0.54,2.24) 0.79          | 0.87 |
| Quarter 3                                | 1 | 1.04(0.66,1.65) 0.85 | 1.04(0.58,1.87) 0.90           | 1.39(0.79,2.45) 0.26          | 0.33 |
| Quarter 4                                | 1 | 0.92(0.51,1.66) 0.79 | 1.35(0.72,2.51) 0.35           | 0.89(0.47,1.68) 0.71          | 0.91 |
| Total energy intake from diet, kcal      |   |                      |                                |                               | 0.08 |
| [0,1445.5]                               | 1 | 0.79(0.57,1.10) 0.16 | 0.86(0.53,1.40) 0.55           | 1.17(0.64,2.14) 0.61          | 0.94 |
| (1445.5,1908]                            | 1 | 1.03(0.57,1.86) 0.92 | 1.35(0.80,2.29) 0.26           | 1.27(0.73,2.20) 0.39          | 0.22 |
| (1908,2494.5]                            | 1 | 1.57(0.68,3.59) 0.29 | 2.54(1.29,5.01) 0.01           | 1.78(0.83,3.81) 0.14          | 0.09 |
| (2494.5,15594]                           | 1 | 2.80(0.89,8.85) 0.08 | 1.08(0.35,3.30) 0.90           | 1.41(0.43,4.61) 0.57          | 0.39 |
| Self reported health                     |   |                      |                                |                               | 0.3  |
| Very good to excellent                   | 1 | 1.12(0.71,1.77) 0.62 | 1.46(0.94,2.26) 0.09           | 1.11(0.62,1.98) 0.72          | 0.38 |
| Good                                     | 1 | 1.04(0.67,1.63) 0.86 | 0.99(0.61,1.60) 0.96           | 1.24(0.73,2.09) 0.42          | 0.53 |
| Poor to fair                             | 1 | 1.01(0.61,1.68) 0.96 | 1.19(0.70,2.04) 0.52           | 0.96(0.51,1.79) 0.89          | 0.95 |
| Family history of cardiovascular disease |   |                      |                                |                               | 0.81 |
| No                                       | 1 | 1.10(0.79,1.54) 0.56 | 1.19(0.84,1.70) 0.33           | 1.15(0.77,1.72) 0.50          | 0.43 |
| Yes                                      | 1 | 0.97(0.53,1.75) 0.91 | 1.33(0.72,2.47) 0.37           | 0.95(0.45,2.01) 0.89          | 0.84 |
| Cardiovascular disease                   |   |                      |                                |                               | 0.65 |
| No                                       | 1 | 0.95(0.68,1.32) 0.76 | 1.14(0.79,1.64) 0.49           | 0.98(0.65,1.50) 0.94          | 0.79 |
| Yes                                      | 1 | 1.38(0.89,2.15) 0.15 | 1.39(0.89,2.19) 0.15           | 1.35(0.84,2.19) 0.21          | 0.27 |
| Chronic obstructive pulmonary diseases   |   |                      |                                |                               | 0.11 |
| No                                       | 1 | 1.20(0.91,1.58) 0.20 | 1.32(0.96,1.80) 0.08           | 1.10(0.78,1.56) 0.59          | 0.47 |
| Yes                                      | 1 | 0.23(0.08,0.71) 0.01 | 0.47(0.16,1.40) 0.17           | 1.06(0.44,2.56) 0.90          | 0.96 |
| History of chronic kidney disease        |   |                      |                                |                               | 0.73 |
| No                                       | 1 | 1.09(0.82,1.45) 0.54 | 1.24(0.92,1.67) 0.16           | 1.13(0.81,1.60) 0.47          | 0.34 |
| Yes                                      | 1 | 0.51(0.04,6.63) 0.61 | 0.39(0.06,2.55) 0.32           | 0.26(0.03,2.27) 0.22          | 0.12 |
| Cancer                                   |   |                      |                                |                               | 0.44 |
| No                                       | 1 | 1.09(0.82,1.46) 0.55 | 1.21(0.89,1.66) 0.23           | 1.01(0.67,1.53) 0.95          | 0.72 |
| Yes                                      | 1 | 1.38(0.58,3.30) 0.47 | 1.48(0.58,3.81) 0.41           | 1.73(0.64,4.71) 0.28          | 0.28 |
| <b>Cancer mortality</b>                  |   |                      |                                |                               |      |
| Sex                                      |   |                      |                                |                               | 0.43 |
| Male                                     | 1 | 0.85(0.54,1.34) 0.48 | 0.92(0.59,1.44) 0.71           | 0.94(0.55,1.59) 0.81          | 0.97 |
| Female                                   | 1 | 1.24(0.76,2.00) 0.39 | 0.88(0.52,1.48) 0.62           | 0.81(0.47,1.39) 0.44          | 0.27 |
| Age, years                               |   |                      |                                |                               | 0.04 |
| <60                                      | 1 | 0.68(0.30,1.55) 0.36 | 1.41(0.68,2.90) 0.35           | 0.99(0.46,2.16) 0.99          | 0.60 |
| ≥60                                      | 1 | 1.16(0.83,1.62) 0.38 | 0.76(0.51,1.12) 0.16           | 0.86(0.57,1.30) 0.48          | 0.15 |
| BMI, kg/m2                               |   |                      |                                |                               | 0.17 |
| Normal weight (<25)                      | 1 | 1.70(0.95,3.04) 0.07 | 1.51(0.79,2.90) 0.21           | 1.03(0.48,2.18) 0.95          | 0.73 |
| Overweight (25-30)                       | 1 | 0.88(0.53,1.48) 0.64 | 0.77(0.41,1.43) 0.40           | 1.17(0.61,2.22) 0.64          | 0.67 |
| Obesity (≥30)                            | 1 | 0.86(0.49,1.53) 0.61 | 0.83(0.42,1.65) 0.60           | 0.65(0.32,1.30) 0.22          | 0.25 |
| Race                                     |   |                      |                                |                               | 0.56 |
| Non-Hispanic White                       | 1 | 1.11(0.78,1.58) 0.57 | 0.96(0.65,1.42) 0.85           | 0.98(0.63,1.52) 0.92          | 0.73 |
| Non-Hispanic Black                       | 1 | 1.13(0.53,2.41) 0.76 | 1.20(0.58,2.50) 0.62           | 0.83(0.32,2.13) 0.69          | 0.86 |
| Mexican American                         | 1 | 0.33(0.14,0.76) 0.01 | 0.12(0.03,0.42)                | 0.23(0.08,0.62)               | 0.02 |
| Others                                   | 1 | 1.03(0.33,3.19) 0.96 | <0.001<br>1.50(0.47,4.76) 0.49 | 0.004<br>1.13(0.28,4.55) 0.87 | 0.72 |



|                                          |   |                      |                      |                      |      |
|------------------------------------------|---|----------------------|----------------------|----------------------|------|
| Male                                     | 1 | 1.01(0.73,1.41) 0.94 | 1.09(0.76,1.58) 0.64 | 0.87(0.60,1.28) 0.48 | 0.56 |
| Female                                   | 1 | 1.00(0.76,1.32) 0.99 | 1.26(0.89,1.78) 0.19 | 1.18(0.78,1.79) 0.42 | 0.20 |
| Age, years                               |   |                      |                      |                      | 0.26 |
| <60                                      | 1 | 0.97(0.58,1.63) 0.92 | 1.56(0.92,2.65) 0.10 | 0.99(0.56,1.73) 0.97 | 0.55 |
| ≥60                                      | 1 | 0.97(0.76,1.24) 0.82 | 0.96(0.74,1.26) 0.79 | 0.96(0.68,1.34) 0.79 | 0.78 |
| BMI, kg/m <sup>2</sup>                   |   |                      |                      |                      | 0.34 |
| Normal weight (<25)                      | 1 | 1.20(0.85,1.69) 0.30 | 1.19(0.78,1.80) 0.42 | 1.43(0.89,2.29) 0.14 | 0.18 |
| Overweight (25-30)                       | 1 | 1.15(0.80,1.64) 0.45 | 1.47(1.00,2.15) 0.05 | 1.15(0.72,1.83) 0.57 | 0.39 |
| Obesity (≥30)                            | 1 | 0.78(0.54,1.14) 0.20 | 0.86(0.56,1.31) 0.47 | 0.60(0.37,0.97) 0.04 | 0.07 |
| Race                                     |   |                      |                      |                      | 0.91 |
| Non-Hispanic White                       | 1 | 0.99(0.78,1.27) 0.96 | 1.12(0.85,1.47) 0.42 | 1.00(0.72,1.38) 0.98 | 0.78 |
| Non-Hispanic Black                       | 1 | 1.28(0.68,2.42) 0.44 | 1.29(0.69,2.40) 0.42 | 1.09(0.54,2.18) 0.81 | 0.67 |
| Mexican American                         | 1 | 1.47(0.58,3.76) 0.42 | 1.80(0.75,4.30) 0.19 | 0.79(0.34,1.84) 0.59 | 0.75 |
| Others                                   | 1 | 0.47(0.15,1.48) 0.20 | 0.63(0.20,2.00) 0.43 | 0.49(0.15,1.65) 0.25 | 0.38 |
| Education level                          |   |                      |                      |                      | 0.68 |
| Less than high school                    | 1 | 1.06(0.73,1.53) 0.78 | 1.04(0.63,1.72) 0.87 | 0.79(0.45,1.40) 0.42 | 0.53 |
| High school or equivalent                | 1 | 0.95(0.60,1.52) 0.84 | 0.90(0.57,1.42) 0.66 | 1.03(0.60,1.75) 0.92 | 0.94 |
| College or above                         | 1 | 1.07(0.73,1.56) 0.74 | 1.38(0.99,1.91) 0.06 | 1.07(0.69,1.67) 0.77 | 0.56 |
| Family income-poverty ratio              |   |                      |                      |                      | 0.81 |
| <1.0                                     | 1 | 1.29(0.79,2.12) 0.31 | 1.22(0.70,2.11) 0.48 | 1.47(0.94,2.29) 0.09 | 0.14 |
| 1.0-3.0                                  | 1 | 0.94(0.70,1.26) 0.68 | 0.96(0.69,1.35) 0.83 | 0.74(0.50,1.10) 0.13 | 0.20 |
| >3.0                                     | 1 | 0.97(0.61,1.54) 0.90 | 1.38(0.85,2.23) 0.19 | 1.34(0.82,2.19) 0.24 | 0.11 |
| Smoking status                           |   |                      |                      |                      | 0.08 |
| Never                                    | 1 | 0.93(0.63,1.38) 0.73 | 1.12(0.72,1.74) 0.62 | 0.94(0.60,1.46) 0.77 | 0.98 |
| Former                                   | 1 | 1.13(0.80,1.58) 0.49 | 0.94(0.66,1.33) 0.71 | 1.03(0.70,1.52) 0.88 | 0.79 |
| Current                                  | 1 | 0.91(0.56,1.49) 0.72 | 1.52(0.93,2.48) 0.10 | 0.90(0.48,1.68) 0.74 | 0.70 |
| Alcohol drinking                         |   |                      |                      |                      | 0.72 |
| Never                                    | 1 | 0.83(0.59,1.16) 0.28 | 1.04(0.70,1.54) 0.86 | 0.93(0.57,1.50) 0.76 | 0.96 |
| Low to moderate                          | 1 | 1.05(0.74,1.50) 0.78 | 1.21(0.82,1.78) 0.33 | 1.16(0.79,1.70) 0.46 | 0.34 |
| Heavy                                    | 1 | 1.21(0.71,2.06) 0.47 | 1.21(0.68,2.17) 0.52 | 0.80(0.42,1.50) 0.48 | 0.49 |
| Healthy eating index score               |   |                      |                      |                      | 0.88 |
| Quarter 1                                | 1 | 1.14(0.66,1.98) 0.64 | 1.05(0.61,1.81) 0.85 | 1.16(0.63,2.13) 0.63 | 0.67 |
| Quarter 2                                | 1 | 0.85(0.58,1.25) 0.42 | 0.96(0.62,1.50) 0.86 | 0.65(0.33,1.27) 0.21 | 0.31 |
| Quarter 3                                | 1 | 1.29(0.81,2.06) 0.28 | 1.45(0.91,2.31) 0.12 | 1.34(0.80,2.25) 0.27 | 0.21 |
| Quarter 4                                | 1 | 0.85(0.52,1.37) 0.50 | 1.02(0.59,1.76) 0.94 | 0.86(0.51,1.45) 0.57 | 0.77 |
| Total energy intake from diet, kcal      |   |                      |                      |                      | 0.87 |
| [0,1445.5]                               | 1 | 1.08(0.76,1.55) 0.67 | 1.10(0.73,1.66) 0.64 | 0.90(0.54,1.48) 0.67 | 0.91 |
| (1445.5,1908]                            | 1 | 1.05(0.70,1.60) 0.80 | 1.09(0.67,1.77) 0.72 | 0.97(0.59,1.61) 0.91 | 0.97 |
| (1908,2494.5]                            | 1 | 1.13(0.64,1.98) 0.68 | 1.49(0.88,2.51) 0.13 | 1.32(0.67,2.61) 0.42 | 0.31 |
| (2494.5,15594]                           | 1 | 0.60(0.23,1.55) 0.29 | 0.91(0.34,2.46) 0.85 | 0.77(0.34,1.74) 0.53 | 0.96 |
| Self reported health                     |   |                      |                      |                      | 0.39 |
| Very good to excellent                   | 1 | 1.11(0.75,1.64) 0.62 | 1.26(0.78,2.02) 0.35 | 0.94(0.58,1.51) 0.79 | 0.91 |
| Good                                     | 1 | 0.99(0.66,1.49) 0.96 | 1.23(0.78,1.94) 0.38 | 0.91(0.53,1.59) 0.75 | 0.95 |
| Poor to fair                             | 1 | 0.85(0.53,1.35) 0.48 | 0.90(0.60,1.37) 0.63 | 1.01(0.60,1.68) 0.97 | 0.87 |
| Family history of cardiovascular disease |   |                      |                      |                      | 0.7  |
| No                                       | 1 | 1.05(0.82,1.35) 0.68 | 1.13(0.87,1.48) 0.37 | 1.07(0.76,1.51) 0.71 | 0.61 |
| Yes                                      | 1 | 0.90(0.55,1.45) 0.65 | 1.16(0.69,1.95) 0.58 | 0.78(0.47,1.30) 0.35 | 0.64 |



|                                        |   |                      |                      |                      |      |  |      |
|----------------------------------------|---|----------------------|----------------------|----------------------|------|--|------|
| Cardiovascular disease                 |   |                      |                      |                      |      |  | 0.52 |
| No                                     | 1 | 0.93(0.73,1.20) 0.59 | 1.00(0.77,1.31) 0.99 | 0.86(0.62,1.19) 0.37 | 0.50 |  |      |
| Yes                                    | 1 | 1.03(0.68,1.55) 0.90 | 1.45(0.96,2.18) 0.08 | 1.31(0.81,2.12) 0.27 | 0.11 |  |      |
| Chronic obstructive pulmonary diseases |   |                      |                      |                      |      |  | 0.11 |
| No                                     | 1 | 0.94(0.74,1.20) 0.63 | 1.12(0.85,1.47) 0.42 | 0.93(0.67,1.29) 0.66 | 1    |  |      |
| Yes                                    | 1 | 1.24(0.70,2.21) 0.46 | 1.07(0.56,2.07) 0.83 | 1.27(0.65,2.49) 0.48 | 0.63 |  |      |
| History of chronic kidney disease      |   |                      |                      |                      |      |  | 0.44 |
| No                                     | 1 | 0.99(0.79,1.24) 0.95 | 1.15(0.90,1.48) 0.27 | 1.00(0.74,1.35) 1.00 | 0.69 |  |      |
| Yes                                    | 1 | 1.17(0.26,5.22) 0.84 | 0.76(0.16,3.70) 0.74 | 0.42(0.04,4.13) 0.46 | 0.41 |  |      |
| Cancer                                 |   |                      |                      |                      |      |  | 0.37 |
| No                                     | 1 | 0.91(0.71,1.18) 0.50 | 1.13(0.86,1.48) 0.39 | 0.94(0.67,1.31) 0.71 | 0.87 |  |      |
| Yes                                    | 1 | 1.48(0.80,2.74) 0.22 | 1.34(0.72,2.47) 0.36 | 1.34(0.72,2.49) 0.36 | 0.53 |  |      |

Adjusted for sex, age, race, BMI, educational level, smoking status, drinking status, family income poverty ratio, healthy eating index-2015, total energy intake from the diet, self-reported health status, family history of cardiovascular diseases, self-reported cardiovascular disease, self-reported chronic obstructive pulmonary disease, self-reported chronic kidney disease, and self-reported cancer.

**Supplementary Table 2.7** Subgroup analysis of hazard ratios for vitamin B12 levels with all-cause and CVD mortality in participants with prediabetes from NHANES 1999-2018

|                                     | Q1 | Q2                    | Q3                    | Q4                   | <i>P</i> <sub>trend</sub> | <i>P</i> <sub>interaction</sub> |
|-------------------------------------|----|-----------------------|-----------------------|----------------------|---------------------------|---------------------------------|
| <b>All-cause mortality</b>          |    |                       |                       |                      |                           |                                 |
| Sex                                 |    |                       |                       |                      |                           | 0.14                            |
| Male                                | 1  | 1.01(0.82,1.26) 0.90  | 1.23(0.96,1.56) 0.10  | 1.15(0.89,1.48) 0.28 | 0.14                      |                                 |
| Female                              | 1  | 1.26(1.03,1.55) 0.03  | 1.09(0.85,1.40) 0.49  | 1.03(0.81,1.31) 0.81 | 0.98                      |                                 |
| Age, years                          |    |                       |                       |                      |                           | 0.32                            |
| <60                                 | 1  | 1.15(0.75,1.78) 0.52  | 1.45(0.91,2.30) 0.12  | 1.09(0.68,1.76) 0.72 | 0.57                      |                                 |
| ≥60                                 | 1  | 1.12(0.95,1.33) 0.18  | 1.07(0.90,1.26) 0.45  | 1.12(0.93,1.34) 0.24 | 0.38                      |                                 |
| BMI, kg/m <sup>2</sup>              |    |                       |                       |                      |                           | 0.82                            |
| Normal weight (<25)                 | 1  | 1.21(0.89,1.64) 0.22  | 1.07(0.82,1.41) 0.61  | 1.17(0.86,1.60) 0.31 | 0.46                      |                                 |
| Overweight (25-30)                  | 1  | 1.08(0.86,1.36) 0.51  | 1.13(0.83,1.53) 0.45  | 1.12(0.82,1.52) 0.47 | 0.50                      |                                 |
| Obesity (≥30)                       | 1  | 1.12(0.85,1.48) 0.40  | 1.26(0.94,1.69) 0.12  | 1.02(0.74,1.40) 0.92 | 0.79                      |                                 |
| Race                                |    |                       |                       |                      |                           | 0.40                            |
| Non-Hispanic White                  | 1  | 1.09(0.91,1.31) 0.34  | 1.08(0.88,1.34) 0.45  | 1.05(0.86,1.29) 0.62 | 0.74                      |                                 |
| Non-Hispanic Black                  | 1  | 1.25(0.86,1.82) 0.24  | 1.21(0.87,1.68) 0.26  | 0.92(0.63,1.34) 0.66 | 0.84                      |                                 |
| Mexican American                    | 1  | 0.86(0.47,1.56) 0.63  | 1.32(0.81,2.13) 0.26  | 1.31(0.75,2.32) 0.35 | 0.17                      |                                 |
| Others                              | 1  | 1.21(0.65,2.22) 0.55  | 1.55(0.96,2.51) 0.07  | 2.01(1.16,3.49) 0.01 | 0.01                      |                                 |
| Education level                     |    |                       |                       |                      |                           | 0.60                            |
| Less than high school               | 1  | 1.26(0.97,1.63) 0.09  | 1.28(1.00,1.65) 0.05  | 1.13(0.88,1.47) 0.34 | 0.30                      |                                 |
| High school or equivalent           | 1  | 1.11(0.80,1.53) 0.54  | 0.98(0.69,1.41) 0.92  | 1.14(0.77,1.67) 0.52 | 0.71                      |                                 |
| College or above                    | 1  | 1.04(0.81,1.34) 0.74  | 1.17(0.86,1.59) 0.31  | 1.03(0.77,1.38) 0.82 | 0.7                       |                                 |
| Family income-poverty ratio         |    |                       |                       |                      |                           | 0.8                             |
| <1.0                                | 1  | 1.02(0.72,1.45) 0.89  | 1.16(0.79,1.69) 0.45  | 1.31(0.93,1.87) 0.13 | 0.11                      |                                 |
| 1.0-3.0                             | 1  | 1.16(0.96,1.41) 0.13  | 1.08(0.87,1.34) 0.50  | 1.06(0.84,1.33) 0.63 | 0.86                      |                                 |
| >3.0                                | 1  | 1.17(0.86,1.59) 0.31  | 1.26(0.90,1.76) 0.18  | 1.10(0.80,1.52) 0.55 | 0.59                      |                                 |
| Smoking status                      |    |                       |                       |                      |                           | 0.47                            |
| Never                               | 1  | 1.37(1.10,1.70) 0.005 | 1.37(1.07,1.76) 0.01  | 1.38(1.04,1.82) 0.03 | 0.03                      |                                 |
| Former                              | 1  | 1.09(0.87,1.38) 0.46  | 1.06(0.84,1.33) 0.65  | 0.99(0.77,1.27) 0.91 | 0.76                      |                                 |
| Current                             | 1  | 0.92(0.62,1.36) 0.67  | 1.02(0.69,1.52) 0.92  | 0.93(0.61,1.40) 0.72 | 0.86                      |                                 |
| Alcohol drinking                    |    |                       |                       |                      |                           | 0.75                            |
| Never                               | 1  | 1.35(1.05,1.72) 0.02  | 1.29(0.99,1.70) 0.06  | 1.28(0.99,1.65) 0.06 | 0.10                      |                                 |
| Low to moderate                     | 1  | 1.01(0.80,1.29) 0.91  | 1.02(0.75,1.39) 0.89  | 1.05(0.79,1.40) 0.73 | 0.73                      |                                 |
| Heavy                               | 1  | 0.95(0.63,1.44) 0.81  | 1.23(0.81,1.87) 0.33  | 0.93(0.60,1.46) 0.77 | 0.98                      |                                 |
| Healthy eating index score          |    |                       |                       |                      |                           | 0.18                            |
| Quarter 1                           | 1  | 0.96(0.69,1.35) 0.83  | 0.82(0.58,1.16) 0.26  | 0.86(0.59,1.27) 0.45 | 0.30                      |                                 |
| Quarter 2                           | 1  | 1.07(0.78,1.48) 0.67  | 1.11(0.78,1.59) 0.55  | 1.25(0.86,1.81) 0.25 | 0.26                      |                                 |
| Quarter 3                           | 1  | 1.34(0.98,1.83) 0.07  | 1.69(1.22,2.33) 0.002 | 1.50(1.09,2.06) 0.01 | 0.01                      |                                 |
| Quarter 4                           | 1  | 1.17(0.84,1.61) 0.35  | 1.09(0.79,1.50) 0.60  | 0.85(0.59,1.22) 0.37 | 0.24                      |                                 |
| Total energy intake from diet, kcal |    |                       |                       |                      |                           | 0.65                            |
| [0,1445.5]                          | 1  | 1.29(1.05,1.58) 0.01  | 0.97(0.76,1.25) 0.82  | 1.09(0.82,1.46) 0.56 | 0.72                      |                                 |
| (1445.5,1908]                       | 1  | 1.14(0.84,1.55) 0.41  | 1.17(0.86,1.57) 0.32  | 1.17(0.82,1.67) 0.38 | 0.40                      |                                 |
| (1908,2494.5]                       | 1  | 0.95(0.61,1.47) 0.82  | 1.15(0.68,1.94) 0.61  | 0.96(0.61,1.51) 0.86 | 0.94                      |                                 |
| (2494.5,15594]                      | 1  | 0.78(0.44,1.37) 0.38  | 1.04(0.62,1.74) 0.88  | 0.93(0.59,1.48) 0.77 | 0.79                      |                                 |
| Self reported health                |    |                       |                       |                      |                           | 0.08                            |
| Very good to excellent              | 1  | 1.02(0.81,1.29) 0.84  | 1.23(0.94,1.60) 0.13  | 0.95(0.70,1.28) 0.73 | 0.83                      |                                 |

|                                          |   |                      |                      |                      |       |
|------------------------------------------|---|----------------------|----------------------|----------------------|-------|
| Good                                     | 1 | 1.22(0.96,1.57) 0.11 | 0.89(0.67,1.19) 0.44 | 1.21(0.90,1.63) 0.21 | 0.65  |
| Poor to fair                             | 1 | 1.18(0.90,1.56) 0.23 | 1.38(1.03,1.84) 0.03 | 1.18(0.85,1.64) 0.33 | 0.28  |
| Family history of cardiovascular disease |   |                      |                      |                      | 0.68  |
| No                                       | 1 | 1.17(0.98,1.40) 0.08 | 1.22(1.00,1.48) 0.05 | 1.24(1.02,1.51) 0.03 | 0.05  |
| Yes                                      | 1 | 1.02(0.74,1.39) 0.91 | 0.99(0.70,1.38) 0.93 | 0.86(0.61,1.21) 0.38 | 0.34  |
| Cardiovascular disease                   |   |                      |                      |                      | 0.12  |
| No                                       | 1 | 1.08(0.88,1.32) 0.46 | 1.23(0.99,1.54) 0.06 | 1.15(0.93,1.44) 0.20 | 0.12  |
| Yes                                      | 1 | 1.19(0.91,1.57) 0.21 | 0.99(0.73,1.33) 0.94 | 0.95(0.71,1.27) 0.72 | 0.42  |
| Chronic obstructive pulmonary diseases   |   |                      |                      |                      | 0.01  |
| No                                       | 1 | 1.05(0.89,1.24) 0.55 | 1.17(0.96,1.43) 0.11 | 1.09(0.91,1.31) 0.36 | 0.24  |
| Yes                                      | 1 | 1.82(1.10,3.02) 0.02 | 0.99(0.61,1.62) 0.97 | 1.01(0.55,1.84) 0.98 | 0.34  |
| History of chronic kidney disease        |   |                      |                      |                      | 0.78  |
| No                                       | 1 | 1.14(0.97,1.33) 0.11 | 1.14(0.95,1.37) 0.16 | 1.09(0.91,1.30) 0.34 | 0.44  |
| Yes                                      | 1 | 1.02(0.42,2.52) 0.96 | 1.23(0.62,2.46) 0.55 | 1.45(0.70,3.02) 0.32 | 0.27  |
| Cancer                                   |   |                      |                      |                      | 0.38  |
| No                                       | 1 | 1.06(0.91,1.25) 0.45 | 1.14(0.94,1.38) 0.19 | 1.04(0.86,1.26) 0.70 | 0.57  |
| Yes                                      | 1 | 1.39(0.96,2.04) 0.08 | 1.23(0.87,1.75) 0.24 | 1.35(0.95,1.91) 0.09 | 0.19  |
| <b>CVD mortality</b>                     |   |                      |                      |                      |       |
| Sex                                      |   |                      |                      |                      | 0.004 |
| Male                                     | 1 | 0.95(0.60,1.51) 0.83 | 1.51(1.01,2.23) 0.04 | 1.55(0.99,2.42) 0.06 | 0.01  |
| Female                                   | 1 | 1.23(0.82,1.82) 0.32 | 0.81(0.55,1.20) 0.30 | 0.91(0.56,1.50) 0.72 | 0.38  |
| Age, years                               |   |                      |                      |                      | 0.70  |
| <60                                      | 1 | 1.04(0.43,2.53) 0.92 | 1.80(0.72,4.52) 0.21 | 1.39(0.57,3.38) 0.47 | 0.26  |
| ≥60                                      | 1 | 1.09(0.79,1.49) 0.61 | 1.04(0.80,1.36) 0.74 | 1.21(0.89,1.64) 0.23 | 0.29  |
| BMI, kg/m <sup>2</sup>                   |   |                      |                      |                      | 0.64  |
| Normal weight (<25)                      | 1 | 1.22(0.76,1.93) 0.41 | 1.16(0.71,1.89) 0.56 | 1.72(1.04,2.86) 0.04 | 0.06  |
| Overweight (25-30)                       | 1 | 1.59(0.95,2.66) 0.08 | 1.55(0.99,2.41) 0.05 | 1.58(0.94,2.68) 0.09 | 0.17  |
| Obesity (≥30)                            | 1 | 0.75(0.45,1.27) 0.29 | 1.00(0.62,1.62) 1.00 | 0.93(0.57,1.54) 0.79 | 0.85  |
| Race                                     |   |                      |                      |                      | 0.35  |
| Non-Hispanic White                       | 1 | 0.99(0.67,1.46) 0.95 | 1.03(0.74,1.44) 0.85 | 1.09(0.75,1.59) 0.63 | 0.57  |
| Non-Hispanic Black                       | 1 | 1.27(0.61,2.63) 0.52 | 1.18(0.61,2.31) 0.62 | 1.03(0.46,2.30) 0.94 | 0.88  |
| Mexican American                         | 1 | 1.72(0.65,4.55) 0.28 | 2.14(0.75,6.13) 0.16 | 3.60(1.49,8.65)      | 0.004 |
| Others                                   | 1 | 1.47(0.46,4.72) 0.52 | 1.35(0.43,4.18) 0.61 | 5.41(1.71,17.07)     | 0.01  |
| Education level                          |   |                      |                      |                      | 0.16  |
| Less than high school                    | 1 | 1.45(0.93,2.26) 0.10 | 1.26(0.84,1.87) 0.26 | 1.50(0.90,2.52) 0.12 | 0.21  |
| High school or equivalent                | 1 | 1.01(0.53,1.96) 0.97 | 1.42(0.77,2.60) 0.26 | 1.89(1.03,3.49) 0.04 | 0.02  |
| College or above                         | 1 | 0.89(0.57,1.37) 0.59 | 0.90(0.58,1.41) 0.65 | 0.84(0.53,1.35) 0.47 | 0.52  |
| Family income-poverty ratio              |   |                      |                      |                      | 0.42  |
| <1.0                                     | 1 | 0.93(0.51,1.71) 0.82 | 1.17(0.60,2.29) 0.64 | 1.26(0.60,2.67) 0.54 | 0.46  |
| 1.0-3.0                                  | 1 | 1.14(0.80,1.62) 0.47 | 0.87(0.62,1.22) 0.41 | 1.13(0.77,1.66) 0.55 | 0.91  |
| >3.0                                     | 1 | 1.21(0.67,2.18) 0.54 | 1.68(0.92,3.05) 0.09 | 1.48(0.85,2.57) 0.16 | 0.13  |
| Smoking status                           |   |                      |                      |                      | 0.52  |
| Never                                    | 1 | 0.98(0.65,1.48) 0.92 | 1.16(0.80,1.68) 0.43 | 0.98(0.60,1.61) 0.95 | 0.81  |
| Former                                   | 1 | 1.11(0.68,1.80) 0.68 | 0.95(0.61,1.49) 0.83 | 1.49(1.00,2.24) 0.05 | 0.09  |
| Current                                  | 1 | 1.19(0.52,2.72) 0.67 | 1.26(0.69,2.31) 0.45 | 1.27(0.59,2.73) 0.54 | 0.53  |
| Alcohol drinking                         |   |                      |                      |                      | 0.86  |
| Never                                    | 1 | 1.23(0.80,1.89) 0.35 | 1.23(0.84,1.81) 0.28 | 1.32(0.86,2.03) 0.21 | 0.24  |

|                                          |   |                       |                      |                       |      |
|------------------------------------------|---|-----------------------|----------------------|-----------------------|------|
| Low to moderate                          | 1 | 0.84(0.51,1.39) 0.49  | 0.89(0.51,1.54) 0.67 | 1.06(0.65,1.73) 0.81  | 0.67 |
| Heavy                                    | 1 | 1.56(0.67,3.62) 0.31  | 1.87(0.98,3.56) 0.06 | 1.74(0.78,3.91) 0.18  | 0.19 |
| Healthy eating index score               |   |                       |                      |                       | 0.54 |
| Quarter 1                                | 1 | 1.15(0.59,2.26) 0.68  | 0.92(0.48,1.73) 0.79 | 1.50(0.77,2.92) 0.23  | 0.38 |
| Quarter 2                                | 1 | 1.20(0.60,2.38) 0.61  | 1.26(0.68,2.35) 0.46 | 1.72(0.88,3.36) 0.11  | 0.11 |
| Quarter 3                                | 1 | 0.90(0.55,1.49) 0.69  | 1.24(0.71,2.14) 0.45 | 1.35(0.78,2.34) 0.28  | 0.16 |
| Quarter 4                                | 1 | 1.14(0.67,1.93) 0.64  | 1.02(0.61,1.71) 0.93 | 0.84(0.46,1.53) 0.57  | 0.46 |
| Total energy intake from diet, kcal      |   |                       |                      |                       | 0.51 |
| [0,1445.5]                               | 1 | 1.26(0.82,1.92) 0.29  | 0.70(0.46,1.07) 0.10 | 1.16(0.70,1.91) 0.57  | 0.76 |
| (1445.5,1908]                            | 1 | 1.08(0.63,1.83) 0.79  | 1.18(0.77,1.81) 0.44 | 1.28(0.75,2.18) 0.38  | 0.33 |
| (1908,2494.5]                            | 1 | 0.68(0.33,1.37) 0.28  | 1.16(0.51,2.63) 0.72 | 1.13(0.56,2.25) 0.74  | 0.21 |
| (2494.5,15594]                           | 1 | 0.78(0.21,2.88) 0.71  | 1.37(0.37,5.15) 0.64 | 1.26(0.38,4.17) 0.71  | 0.42 |
| Self reported health                     |   |                       |                      |                       | 0.01 |
| Very good to excellent                   | 1 | 1.26(0.74,2.14) 0.39  | 1.81(1.12,2.91) 0.02 | 1.62(0.90,2.92) 0.11  | 0.03 |
| Good                                     | 1 | 1.13(0.73,1.75) 0.59  | 0.66(0.42,1.05) 0.08 | 1.47(0.92,2.36) 0.11  | 0.31 |
| Poor to fair                             | 1 | 0.98(0.57,1.70) 0.95  | 1.22(0.75,1.97) 0.42 | 0.88(0.48,1.60) 0.67  | 0.88 |
| Family history of cardiovascular disease |   |                       |                      |                       | 1    |
| No                                       | 1 | 1.14(0.80,1.62) 0.47  | 1.21(0.85,1.72) 0.29 | 1.35(0.93,1.98) 0.12  | 0.12 |
| Yes                                      | 1 | 0.94(0.51,1.74) 0.84  | 0.93(0.56,1.52) 0.76 | 1.05(0.61,1.81) 0.85  | 0.82 |
| Cardiovascular disease                   |   |                       |                      |                       | 0.11 |
| No                                       | 1 | 0.83(0.56,1.22) 0.34  | 1.05(0.73,1.52) 0.78 | 1.17(0.81,1.69) 0.40  | 0.21 |
| Yes                                      | 1 | 1.66(1.02,2.71) 0.04  | 1.26(0.80,1.98) 0.32 | 1.36(0.82,2.27) 0.24  | 0.5  |
| Chronic obstructive pulmonary diseases   |   |                       |                      |                       | 0.25 |
| No                                       | 1 | 0.99(0.71,1.37) 0.94  | 1.08(0.80,1.46) 0.62 | 1.17(0.84,1.64) 0.35  | 0.27 |
| Yes                                      | 1 | 4.48(1.35,14.84) 0.01 | 2.98(0.90,9.91) 0.07 | 3.68(0.99,13.74) 0.05 | 0.14 |
| History of chronic kidney disease        |   |                       |                      |                       | 0.73 |
| No                                       | 1 | 1.11(0.78,1.56) 0.57  | 1.12(0.83,1.51) 0.45 | 1.27(0.92,1.76) 0.15  | 0.16 |
| Yes                                      | 1 | 0.38(0.10,1.51) 0.17  | 0.39(0.14,1.07) 0.07 | 0.61(0.15,2.53) 0.49  | 0.53 |
| Cancer                                   |   |                       |                      |                       | 0.48 |
| No                                       | 1 | 1.08(0.76,1.52) 0.66  | 1.17(0.84,1.63) 0.34 | 1.19(0.83,1.71) 0.35  | 0.29 |
| Yes                                      | 1 | 1.14(0.54,2.42) 0.73  | 0.91(0.50,1.65) 0.75 | 1.47(0.80,2.69) 0.21  | 0.32 |
| <b>Cancer mortality</b>                  |   |                       |                      |                       |      |
| Sex                                      |   |                       |                      |                       | 0.33 |
| Male                                     | 1 | 0.84(0.53,1.33) 0.46  | 0.97(0.63,1.49) 0.90 | 1.06(0.63,1.79) 0.83  | 0.58 |
| Female                                   | 1 | 1.13(0.74,1.73) 0.56  | 0.78(0.49,1.25) 0.31 | 0.82(0.48,1.39) 0.46  | 0.25 |
| Age, years                               |   |                       |                      |                       | 0.85 |
| <60                                      | 1 | 1.20(0.62,2.34) 0.59  | 1.18(0.62,2.26) 0.62 | 1.22(0.60,2.49) 0.58  | 0.65 |
| ≥60                                      | 1 | 0.89(0.61,1.29) 0.53  | 0.79(0.55,1.14) 0.21 | 0.91(0.61,1.38) 0.66  | 0.60 |
| BMI, kg/m2                               |   |                       |                      |                       | 0.72 |
| Normal weight (<25)                      | 1 | 1.29(0.73,2.29) 0.39  | 1.03(0.56,1.86) 0.93 | 0.99(0.51,1.93) 0.98  | 0.78 |
| Overweight (25-30)                       | 1 | 0.85(0.51,1.43) 0.54  | 0.67(0.37,1.20) 0.18 | 1.03(0.57,1.85) 0.93  | 0.96 |
| Obesity (≥30)                            | 1 | 0.91(0.55,1.48) 0.70  | 1.01(0.62,1.67) 0.95 | 0.88(0.44,1.74) 0.71  | 0.81 |
| Race                                     |   |                       |                      |                       | 0.71 |
| Non-Hispanic White                       | 1 | 0.89(0.62,1.27) 0.53  | 0.87(0.59,1.27) 0.47 | 0.97(0.65,1.45) 0.87  | 0.93 |
| Non-Hispanic Black                       | 1 | 1.67(0.97,2.88) 0.07  | 1.05(0.62,1.79) 0.84 | 0.75(0.33,1.73) 0.50  | 0.36 |
| Mexican American                         | 1 | 0.66(0.24,1.78) 0.41  | 0.82(0.35,1.89) 0.64 | 0.47(0.15,1.54) 0.21  | 0.21 |

|                                          |   |                      |                       |                        |       |      |
|------------------------------------------|---|----------------------|-----------------------|------------------------|-------|------|
| Others                                   | 1 | 1.47(0.53,4.09) 0.46 | 0.99(0.34,2.85) 0.98  | 1.82(0.55,5.95) 0.32   | 0.48  |      |
| Education level                          |   |                      |                       |                        |       | 0.85 |
| Less than high school                    | 1 | 1.17(0.69,1.98) 0.56 | 0.99(0.57,1.71) 0.97  | 0.75(0.45,1.25) 0.27   | 0.22  |      |
| High school or equivalent                | 1 | 0.86(0.48,1.54) 0.62 | 0.72(0.42,1.23) 0.23  | 0.76(0.38,1.53) 0.45   | 0.40  |      |
| College or above                         | 1 | 0.93(0.55,1.59) 0.80 | 1.00(0.59,1.69) 0.99  | 1.16(0.68,2.00) 0.58   | 0.50  |      |
| Family income-poverty ratio              |   |                      |                       |                        |       | 0.71 |
| <1.0                                     | 1 | 0.78(0.37,1.64) 0.51 | 0.52(0.26,1.03) 0.06  | 0.66(0.27,1.65) 0.38   | 0.23  |      |
| 1.0-3.0                                  | 1 | 1.01(0.63,1.63) 0.95 | 0.75(0.46,1.23) 0.26  | 1.03(0.57,1.85) 0.93   | 0.83  |      |
| >3.0                                     | 1 | 1.05(0.59,1.85) 0.87 | 1.20(0.73,1.98) 0.47  | 1.13(0.68,1.88) 0.63   | 0.54  |      |
| Smoking status                           |   |                      |                       |                        |       | 0.12 |
| Never                                    | 1 | 1.39(0.87,2.22) 0.17 | 0.83(0.47,1.46) 0.53  | 1.24(0.63,2.44) 0.53   | 0.93  |      |
| Former                                   | 1 | 0.77(0.47,1.27) 0.31 | 0.96(0.61,1.53) 0.88  | 0.71(0.42,1.21) 0.21   | 0.37  |      |
| Current                                  | 1 | 0.93(0.51,1.66) 0.79 | 0.83(0.44,1.57) 0.56  | 1.09(0.62,1.93) 0.76   | 0.80  |      |
| Alcohol drinking                         |   |                      |                       |                        |       | 0.09 |
| Never                                    | 1 | 1.25(0.82,1.92) 0.30 | 0.69(0.41,1.18) 0.18  | 1.03(0.52,2.05) 0.93   | 0.60  |      |
| Low to moderate                          | 1 | 0.94(0.57,1.58) 0.83 | 0.89(0.53,1.48) 0.65  | 1.01(0.58,1.76) 0.96   | 0.96  |      |
| Heavy                                    | 1 | 0.48(0.23,1.04) 0.06 | 1.01(0.55,1.87) 0.97  | 0.68(0.35,1.34) 0.27   | 0.75  |      |
| Healthy eating index score               |   |                      |                       |                        |       | 0.29 |
| Quarter 1                                | 1 | 0.89(0.45,1.74) 0.73 | 0.89(0.48,1.64) 0.70  | 0.52(0.25,1.08) 0.08   | 0.08  |      |
| Quarter 2                                | 1 | 0.64(0.36,1.12) 0.12 | 0.61(0.31,1.19) 0.15  | 0.95(0.51,1.75) 0.87   | 0.98  |      |
| Quarter 3                                | 1 | 1.49(0.79,2.80) 0.22 | 1.62(0.89,2.93) 0.11  | 1.70(0.80,3.62) 0.17   | 0.21  |      |
| Quarter 4                                | 1 | 1.13(0.63,2.03) 0.69 | 0.88(0.50,1.55) 0.66  | 0.94(0.51,1.72) 0.84   | 0.65  |      |
| Total energy intake from diet, kcal      |   |                      |                       |                        |       | 0.18 |
| [0,1445.5]                               | 1 | 1.13(0.72,1.77) 0.59 | 0.47(0.26,0.84) 0.01  | 0.74(0.35,1.57) 0.43   | 0.10  |      |
| (1445.5,1908]                            | 1 | 0.99(0.52,1.86) 0.97 | 0.80(0.43,1.50) 0.49  | 1.45(0.69,3.07) 0.33   | 0.47  |      |
| (1908,2494.5]                            | 1 | 0.81(0.40,1.63) 0.55 | 0.91(0.45,1.83) 0.79  | 0.65(0.33,1.31) 0.23   | 0.29  |      |
| (2494.5,15594]                           | 1 | 1.47(0.56,3.87) 0.43 | 2.08(0.89,4.84) 0.09  | 1.65(0.76,3.56) 0.20   | 0.49  |      |
| Self reported health                     |   |                      |                       |                        |       | 0.01 |
| Very good to excellent                   | 1 | 0.46(0.27,0.80) 0.01 | 0.45(0.26,0.77) 0.004 | 0.37(0.21,0.65) <0.001 | 0.001 |      |
| Good                                     | 1 | 1.04(0.60,1.80) 0.89 | 0.83(0.47,1.47) 0.53  | 0.76(0.43,1.33) 0.33   | 0.24  |      |
| Poor to fair                             | 1 | 1.62(0.99,2.64) 0.05 | 1.57(0.93,2.67) 0.09  | 1.97(1.14,3.39) 0.02   | 0.03  |      |
| Family history of cardiovascular disease |   |                      |                       |                        |       | 0.58 |
| No                                       | 1 | 0.84(0.61,1.17) 0.31 | 0.89(0.62,1.27) 0.51  | 0.90(0.57,1.41) 0.65   | 0.76  |      |
| Yes                                      | 1 | 1.35(0.81,2.23) 0.25 | 0.92(0.52,1.64) 0.78  | 1.17(0.70,1.94) 0.55   | 0.96  |      |
| Cardiovascular disease                   |   |                      |                       |                        |       | 0.18 |
| No                                       | 1 | 1.12(0.78,1.61) 0.54 | 1.02(0.70,1.48) 0.93  | 1.20(0.79,1.84) 0.39   | 0.50  |      |
| Yes                                      | 1 | 0.57(0.28,1.17) 0.13 | 0.63(0.34,1.17) 0.14  | 0.42(0.19,0.92) 0.03   | 0.04  |      |
| Chronic obstructive pulmonary diseases   |   |                      |                       |                        |       | 0.11 |
| No                                       | 1 | 0.94(0.68,1.31) 0.71 | 0.96(0.69,1.34) 0.81  | 1.07(0.73,1.55) 0.74   | 0.69  |      |
| Yes                                      | 1 | 0.95(0.31,2.90) 0.93 | 0.32(0.09,1.23) 0.10  | 0.19(0.05,0.78) 0.02   | 0.01  |      |
| History of chronic kidney disease        |   |                      |                       |                        |       | 0.47 |
| No                                       | 1 | 0.93(0.68,1.27) 0.65 | 0.89(0.65,1.24) 0.50  | 0.95(0.66,1.38) 0.79   | 0.80  |      |
| Yes                                      | 1 | 2.09(0.57,7.64) 0.27 | 0.40(0.04,3.62) 0.41  | 1.68(0.33,8.54) 0.53   | 0.90  |      |
| Cancer                                   |   |                      |                       |                        |       | 0.95 |
| No                                       | 1 | 0.90(0.61,1.31) 0.57 | 0.86(0.59,1.27) 0.46  | 0.92(0.60,1.41) 0.70   | 0.71  |      |
| Yes                                      | 1 | 1.18(0.65,2.13) 0.59 | 0.96(0.54,1.69) 0.88  | 1.13(0.63,2.01) 0.68   | 0.88  |      |
| <b>Other mortality</b>                   |   |                      |                       |                        |       |      |

|                                          |   |                      |                          |                          |       |  |      |
|------------------------------------------|---|----------------------|--------------------------|--------------------------|-------|--|------|
| Sex                                      |   |                      |                          |                          |       |  | 0.86 |
| Male                                     | 1 | 1.15(0.77,1.70) 0.50 | 1.24(0.82,1.87) 0.32     | 0.96(0.64,1.43) 0.83     | 0.73  |  |      |
| Female                                   | 1 | 1.35(1.01,1.82) 0.04 | 1.51(1.05,2.17) 0.03     | 1.24(0.90,1.72) 0.19     | 0.08  |  |      |
| Age, years                               |   |                      |                          |                          |       |  | 0.39 |
| <60                                      | 1 | 1.22(0.66,2.25) 0.52 | 1.58(0.80,3.10) 0.18     | 0.89(0.45,1.75) 0.74     | 0.91  |  |      |
| ≥60                                      | 1 | 1.26(0.97,1.64) 0.08 | 1.26(0.97,1.62) 0.08     | 1.16(0.88,1.54) 0.29     | 0.34  |  |      |
| BMI, kg/m2                               |   |                      |                          |                          |       |  | 0.44 |
| Normal weight (<25)                      | 1 | 1.17(0.72,1.89) 0.53 | 1.11(0.75,1.65) 0.59     | 1.02(0.66,1.59) 0.92     | 0.93  |  |      |
| Overweight (25-30)                       | 1 | 0.95(0.67,1.35) 0.77 | 1.22(0.75,2.00) 0.42     | 0.93(0.60,1.45) 0.76     | 0.94  |  |      |
| Obesity (≥30)                            | 1 | 1.80(1.16,2.79) 0.01 | 1.84(1.09,3.11) 0.02     | 1.27(0.73,2.20) 0.40     | 0.55  |  |      |
| Race                                     |   |                      |                          |                          |       |  | 0.72 |
| Non-Hispanic White                       | 1 | 1.30(0.99,1.72) 0.06 | 1.29(0.95,1.77) 0.11     | 1.07(0.79,1.44) 0.65     | 0.82  |  |      |
| Non-Hispanic Black                       | 1 | 1.07(0.54,2.11) 0.84 | 1.25(0.76,2.05) 0.39     | 0.98(0.55,1.75) 0.94     | 0.85  |  |      |
| Mexican American                         | 1 | 0.63(0.19,2.11) 0.46 | 1.25(0.53,2.95) 0.61     | 1.30(0.49,3.47) 0.60     | 0.43  |  |      |
| Others                                   | 1 | 1.02(0.37,2.79) 0.97 | 1.83(0.96,3.48) 0.07     | 1.21(0.54,2.67) 0.64     | 0.25  |  |      |
| Education level                          |   |                      |                          |                          |       |  | 0.62 |
| Less than high school                    | 1 | 1.20(0.76,1.89) 0.44 | 1.44(0.95,2.18) 0.09     | 1.10(0.70,1.73) 0.69     | 0.44  |  |      |
| High school or equivalent                | 1 | 1.26(0.79,2.02) 0.33 | 0.94(0.58,1.52) 0.80     | 0.99(0.54,1.82) 0.99     | 0.63  |  |      |
| College or above                         | 1 | 1.24(0.80,1.92) 0.33 | 1.59(0.97,2.62) 0.07     | 1.12(0.68,1.85) 0.65     | 0.54  |  |      |
| Family income-poverty ratio              |   |                      |                          |                          |       |  | 0.58 |
| <1.0                                     | 1 | 1.18(0.67,2.08) 0.57 | 1.64(0.95,2.85) 0.08     | 1.82(1.09,3.07) 0.02     | 0.01  |  |      |
| 1.0-3.0                                  | 1 | 1.28(0.92,1.76) 0.14 | 1.46(1.06,2.00) 0.02     | 1.04(0.74,1.46) 0.81     | 0.63  |  |      |
| >3.0                                     | 1 | 1.24(0.77,1.99) 0.38 | 1.07(0.62,1.83) 0.82     | 0.89(0.55,1.42) 0.62     | 0.37  |  |      |
| Smoking status                           |   |                      |                          |                          |       |  | 0.23 |
| Never                                    | 1 | 1.79(1.17,2.76) 0.01 | 1.95(1.29,2.95)<br>0.001 | 1.88(1.24,2.86)<br>0.003 | 0.003 |  |      |
| Former                                   | 1 | 1.24(0.88,1.75) 0.21 | 1.16(0.84,1.60) 0.37     | 0.88(0.61,1.27) 0.50     | 0.32  |  |      |
| Current                                  | 1 | 0.79(0.45,1.39) 0.42 | 1.04(0.56,1.92) 0.91     | 0.68(0.35,1.33) 0.26     | 0.43  |  |      |
| Alcohol drinking                         |   |                      |                          |                          |       |  | 0.77 |
| Never                                    | 1 | 1.45(0.99,2.14) 0.06 | 1.73(1.15,2.60) 0.01     | 1.40(0.92,2.14) 0.12     | 0.06  |  |      |
| Low to moderate                          | 1 | 1.16(0.83,1.62) 0.38 | 1.24(0.83,1.84) 0.29     | 1.03(0.70,1.50) 0.89     | 0.86  |  |      |
| Heavy                                    | 1 | 1.08(0.59,1.97) 0.79 | 1.12(0.60,2.08) 0.71     | 0.81(0.42,1.56) 0.53     | 0.50  |  |      |
| Healthy eating index score               |   |                      |                          |                          |       |  | 0.48 |
| Quarter 1                                | 1 | 0.93(0.56,1.52) 0.76 | 0.70(0.40,1.23) 0.22     | 0.88(0.48,1.63) 0.69     | 0.48  |  |      |
| Quarter 2                                | 1 | 1.34(0.83,2.15) 0.23 | 1.47(0.87,2.48) 0.15     | 1.20(0.74,1.96) 0.47     | 0.49  |  |      |
| Quarter 3                                | 1 | 1.59(0.91,2.78) 0.11 | 2.10(1.29,3.41)<br>0.003 | 1.45(0.85,2.49) 0.17     | 0.08  |  |      |
| Quarter 4                                | 1 | 1.23(0.69,2.18) 0.49 | 1.31(0.73,2.34) 0.37     | 0.84(0.44,1.58) 0.58     | 0.55  |  |      |
| Total energy intake from diet, kcal      |   |                      |                          |                          |       |  | 0.76 |
| [0,1445.5]                               | 1 | 1.40(1.00,1.96) 0.05 | 1.47(1.01,2.14) 0.04     | 1.26(0.82,1.96) 0.29     | 0.05  |  |      |
| (1445.5,1908]                            | 1 | 1.21(0.78,1.88) 0.39 | 1.40(0.88,2.24) 0.16     | 0.93(0.56,1.54) 0.77     | 0.95  |  |      |
| (1908,2494.5]                            | 1 | 1.30(0.52,3.28) 0.58 | 1.39(0.55,3.52) 0.48     | 1.06(0.42,2.66) 0.90     | 0.81  |  |      |
| (2494.5,15594]                           | 1 | 0.59(0.26,1.35) 0.21 | 0.67(0.31,1.45) 0.31     | 0.66(0.35,1.26) 0.21     | 0.57  |  |      |
| Self reported health                     |   |                      |                          |                          |       |  | 0.17 |
| Very good to excellent                   | 1 | 1.33(0.95,1.86) 0.10 | 1.56(1.03,2.35) 0.03     | 1.06(0.68,1.63) 0.81     | 0.50  |  |      |
| Good                                     | 1 | 1.48(0.97,2.25) 0.07 | 1.10(0.68,1.77) 0.70     | 1.36(0.85,2.17) 0.20     | 0.48  |  |      |
| Poor to fair                             | 1 | 1.05(0.70,1.58) 0.82 | 1.43(0.91,2.24) 0.12     | 0.91(0.60,1.40) 0.68     | 0.96  |  |      |
| Family history of cardiovascular disease |   |                      |                          |                          |       |  | 0.11 |
| No                                       | 1 | 1.45(1.08,1.95) 0.01 | 1.50(1.13,2.00) 0.01     | 1.43(1.05,1.95) 0.02     | 0.04  |  |      |

|                                        |   |                      |                       |                       |      |
|----------------------------------------|---|----------------------|-----------------------|-----------------------|------|
| Yes                                    | 1 | 0.88(0.54,1.43) 0.61 | 1.02(0.59,1.78) 0.94  | 0.58(0.34,0.99) 0.04  | 0.10 |
| Cardiovascular disease                 |   |                      |                       |                       | 0.08 |
| No                                     | 1 | 1.23(0.90,1.69) 0.19 | 1.54(1.14,2.06) 0.005 | 1.11(0.81,1.51) 0.52  | 0.27 |
| Yes                                    | 1 | 1.22(0.81,1.82) 0.34 | 1.00(0.63,1.61) 0.99  | 1.00(0.63,1.57) 0.99  | 0.77 |
| Chronic obstructive pulmonary diseases |   |                      |                       |                       | 0.09 |
| No                                     | 1 | 1.18(0.89,1.56) 0.26 | 1.40(1.03,1.90) 0.03  | 1.04(0.79,1.38) 0.77  | 0.48 |
| Yes                                    | 1 | 1.88(0.98,3.58) 0.06 | 0.93(0.54,1.61) 0.79  | 1.12(0.55,2.28) 0.76  | 0.61 |
| History of chronic kidney disease      |   |                      |                       |                       | 0.55 |
| No                                     | 1 | 1.28(1.01,1.62) 0.04 | 1.32(1.00,1.74) 0.05  | 1.05(0.81,1.36) 0.73  | 0.75 |
| Yes                                    | 1 | 1.05(0.26,4.14) 0.95 | 2.70(0.80,9.06) 0.11  | 3.19(0.77,13.16) 0.11 | 0.06 |
| Cancer                                 |   |                      |                       |                       | 0.24 |
| No                                     | 1 | 1.13(0.88,1.46) 0.35 | 1.28(0.98,1.67) 0.07  | 0.99(0.75,1.31) 0.94  | 0.79 |
| Yes                                    | 1 | 2.04(1.13,3.69) 0.02 | 1.82(1.10,3.02) 0.02  | 1.59(0.88,2.88) 0.13  | 0.22 |

Adjusted for sex, age, race, BMI, educational level, smoking status, drinking status, family income poverty ratio, healthy eating index-2015, total energy intake from the diet, self-reported health status, family history of cardiovascular diseases, self-reported cardiovascular disease, self-reported chronic obstructive pulmonary disease, self-reported chronic kidney disease, and self-reported cancer.

**Supplementary Table 2.8** Subgroup analysis of hazard ratios for vitamin C levels with all-cause and CVD mortality in participants with prediabetes from NHANES 1999-2018

|                                     | Q1 | Q2                    | Q3                   | Q4                   | <i>P</i> <sub>trend</sub> | <i>P</i> <sub>interaction</sub> |
|-------------------------------------|----|-----------------------|----------------------|----------------------|---------------------------|---------------------------------|
| <b>All-cause mortality</b>          |    |                       |                      |                      |                           |                                 |
| Sex                                 |    |                       |                      |                      |                           | 0.75                            |
| Male                                | 1  | 0.86(0.69,1.07) 0.18  | 1.03(0.80,1.32) 0.85 | 0.98(0.74,1.29) 0.88 | 0.76                      |                                 |
| Female                              | 1  | 0.85(0.67,1.07) 0.17  | 0.87(0.68,1.12) 0.27 | 1.01(0.78,1.31) 0.96 | 0.93                      |                                 |
| Age, years                          |    |                       |                      |                      |                           | 0.55                            |
| <60                                 | 1  | 0.71(0.47,1.08) 0.11  | 0.86(0.60,1.23) 0.40 | 0.91(0.61,1.37) 0.66 | 0.77                      |                                 |
| ≥60                                 | 1  | 0.90(0.74,1.08) 0.24  | 0.96(0.80,1.16) 0.71 | 1.00(0.81,1.24) 0.98 | 0.76                      |                                 |
| BMI, kg/m <sup>2</sup>              |    |                       |                      |                      |                           | 0.33                            |
| Normal weight (<25)                 | 1  | 1.02(0.75,1.41) 0.88  | 1.05(0.73,1.51) 0.79 | 1.45(1.00,2.10) 0.05 | 0.04                      |                                 |
| Overweight (25-30)                  | 1  | 0.78(0.60,1.02) 0.07  | 0.94(0.72,1.23) 0.64 | 0.92(0.65,1.29) 0.62 | 0.92                      |                                 |
| Obesity (≥30)                       | 1  | 0.82(0.62,1.09) 0.17  | 0.90(0.70,1.16) 0.42 | 0.80(0.58,1.09) 0.16 | 0.27                      |                                 |
| Race                                |    |                       |                      |                      |                           | 0.36                            |
| Non-Hispanic White                  | 1  | 0.83(0.68,1.02) 0.08  | 0.95(0.79,1.14) 0.56 | 0.97(0.78,1.20) 0.77 | 0.88                      |                                 |
| Non-Hispanic Black                  | 1  | 0.95(0.63,1.42) 0.80  | 0.91(0.59,1.42) 0.69 | 1.00(0.66,1.51) 1.00 | 0.96                      |                                 |
| Mexican American                    | 1  | 0.74(0.42,1.30) 0.29  | 0.45(0.23,0.86) 0.02 | 0.89(0.46,1.71) 0.72 | 0.43                      |                                 |
| Others                              | 1  | 0.96(0.52,1.76) 0.90  | 1.43(0.65,3.12) 0.38 | 1.30(0.66,2.55) 0.45 | 0.23                      |                                 |
| Education level                     |    |                       |                      |                      |                           | 0.01                            |
| Less than high school               | 1  | 1.01(0.78,1.30) 0.96  | 1.07(0.82,1.38) 0.63 | 0.93(0.67,1.29) 0.68 | 0.83                      |                                 |
| High school or equivalent           | 1  | 0.93(0.67,1.29) 0.65  | 0.74(0.53,1.04) 0.08 | 1.14(0.82,1.57) 0.44 | 0.77                      |                                 |
| College or above                    | 1  | 0.67(0.51,0.88) 0.004 | 0.95(0.74,1.21) 0.65 | 0.87(0.64,1.19) 0.39 | 0.91                      |                                 |
| Family income-poverty ratio         |    |                       |                      |                      |                           | 0.24                            |
| <1.0                                | 1  | 0.96(0.66,1.39) 0.82  | 0.76(0.54,1.07) 0.12 | 0.87(0.59,1.30) 0.51 | 0.31                      |                                 |
| 1.0-3.0                             | 1  | 0.92(0.73,1.15) 0.47  | 0.92(0.76,1.12) 0.42 | 0.94(0.72,1.23) 0.66 | 0.68                      |                                 |
| >3.0                                | 1  | 0.68(0.50,0.92) 0.01  | 1.03(0.78,1.36) 0.85 | 1.09(0.78,1.51) 0.61 | 0.13                      |                                 |
| Smoking status                      |    |                       |                      |                      |                           | 0.96                            |
| Never                               | 1  | 0.79(0.59,1.05) 0.10  | 0.84(0.63,1.10) 0.20 | 0.92(0.69,1.22) 0.54 | 0.79                      |                                 |
| Former                              | 1  | 0.90(0.69,1.18) 0.46  | 1.10(0.85,1.42) 0.47 | 1.12(0.84,1.51) 0.44 | 0.20                      |                                 |
| Current                             | 1  | 0.75(0.53,1.06) 0.11  | 0.77(0.53,1.13) 0.19 | 0.82(0.51,1.31) 0.41 | 0.37                      |                                 |
| Alcohol drinking                    |    |                       |                      |                      |                           | 0.28                            |
| Never                               | 1  | 0.96(0.71,1.28) 0.77  | 0.95(0.72,1.26) 0.73 | 0.89(0.65,1.21) 0.46 | 0.50                      |                                 |
| Low to moderate                     | 1  | 0.75(0.58,0.99) 0.04  | 0.82(0.64,1.07) 0.15 | 1.06(0.79,1.43) 0.69 | 0.46                      |                                 |
| Heavy                               | 1  | 0.85(0.59,1.21) 0.37  | 1.19(0.79,1.81) 0.41 | 0.91(0.61,1.34) 0.62 | 0.89                      |                                 |
| Healthy eating index score          |    |                       |                      |                      |                           | 0.27                            |
| Quarter 1                           | 1  | 0.64(0.48,0.86) 0.003 | 0.98(0.71,1.37) 0.92 | 0.84(0.56,1.26) 0.40 | 0.45                      |                                 |
| Quarter 2                           | 1  | 0.77(0.56,1.05) 0.09  | 0.83(0.59,1.18) 0.30 | 1.09(0.72,1.63) 0.69 | 0.76                      |                                 |
| Quarter 3                           | 1  | 1.32(0.91,1.92) 0.14  | 1.12(0.79,1.59) 0.51 | 1.18(0.81,1.74) 0.39 | 0.74                      |                                 |
| Quarter 4                           | 1  | 0.85(0.54,1.35) 0.50  | 1.02(0.62,1.65) 0.95 | 0.99(0.64,1.54) 0.97 | 0.65                      |                                 |
| Total energy intake from diet, kcal |    |                       |                      |                      |                           | 0.22                            |
| [0,1445.5]                          | 1  | 0.88(0.69,1.13) 0.32  | 0.94(0.74,1.20) 0.64 | 0.99(0.74,1.32) 0.94 | 0.91                      |                                 |
| (1445.5,1908]                       | 1  | 0.77(0.52,1.12) 0.17  | 0.74(0.53,1.04) 0.09 | 1.09(0.78,1.53) 0.62 | 0.59                      |                                 |
| (1908,2494.5]                       | 1  | 1.06(0.73,1.53) 0.77  | 1.31(0.89,1.93) 0.17 | 1.11(0.72,1.72) 0.63 | 0.47                      |                                 |
| (2494.5,15594]                      | 1  | 0.65(0.40,1.06) 0.08  | 0.85(0.53,1.37) 0.52 | 0.83(0.52,1.33) 0.43 | 0.85                      |                                 |
| Self reported health                |    |                       |                      |                      |                           | 0.28                            |
| Very good to excellent              | 1  | 0.96(0.75,1.21) 0.71  | 0.98(0.76,1.28) 0.91 | 1.22(0.88,1.69) 0.24 | 0.29                      |                                 |



|                                          |   |                       |                      |                      |      |
|------------------------------------------|---|-----------------------|----------------------|----------------------|------|
| Good                                     | 1 | 0.81(0.60,1.08) 0.15  | 0.92(0.69,1.22) 0.54 | 0.86(0.62,1.19) 0.35 | 0.55 |
| Poor to fair                             | 1 | 0.80(0.61,1.03) 0.09  | 0.90(0.67,1.21) 0.49 | 0.92(0.71,1.20) 0.54 | 0.91 |
| Family history of cardiovascular disease |   |                       |                      |                      | 0.06 |
| No                                       | 1 | 0.85(0.70,1.04) 0.11  | 0.87(0.71,1.05) 0.15 | 1.02(0.82,1.28) 0.84 | 0.76 |
| Yes                                      | 1 | 0.84(0.60,1.17) 0.30  | 1.16(0.84,1.61) 0.36 | 0.88(0.58,1.33) 0.55 | 0.93 |
| Cardiovascular disease                   |   |                       |                      |                      | 0.44 |
| No                                       | 1 | 0.80(0.64,0.99) 0.04  | 0.90(0.74,1.11) 0.33 | 0.98(0.78,1.24) 0.90 | 0.81 |
| Yes                                      | 1 | 0.92(0.70,1.23) 0.58  | 1.05(0.79,1.39) 0.75 | 1.00(0.71,1.40) 0.99 | 0.78 |
| Chronic obstructive pulmonary diseases   |   |                       |                      |                      | 0.06 |
| No                                       | 1 | 0.84(0.71,1.00) 0.05  | 0.95(0.80,1.13) 0.59 | 0.95(0.78,1.15) 0.59 | 0.99 |
| Yes                                      | 1 | 0.73(0.51,1.04) 0.08  | 0.78(0.49,1.26) 0.31 | 1.30(0.85,2.00) 0.23 | 0.43 |
| History of chronic kidney disease        |   |                       |                      |                      | 0.54 |
| No                                       | 1 | 0.85(0.71,1.00) 0.06  | 0.93(0.79,1.09) 0.38 | 0.98(0.81,1.19) 0.82 | 0.88 |
| Yes                                      | 1 | 1.01(0.51,2.01) 0.97  | 1.50(0.65,3.46) 0.34 | 1.00(0.40,2.47) 0.99 | 0.71 |
| Cancer                                   |   |                       |                      |                      | 0.41 |
| No                                       | 1 | 0.87(0.72,1.06) 0.17  | 1.01(0.84,1.23) 0.88 | 1.01(0.81,1.26) 0.90 | 0.56 |
| Yes                                      | 1 | 0.80(0.57,1.14) 0.22  | 0.78(0.53,1.14) 0.20 | 0.93(0.63,1.35) 0.69 | 0.71 |
| <b>CVD mortality</b>                     |   |                       |                      |                      |      |
| Sex                                      |   |                       |                      |                      | 0.53 |
| Male                                     | 1 | 0.80(0.49,1.28) 0.35  | 1.03(0.67,1.60) 0.88 | 1.17(0.70,1.96) 0.55 | 0.36 |
| Female                                   | 1 | 0.93(0.61,1.42) 0.73  | 0.88(0.55,1.42) 0.60 | 0.90(0.54,1.47) 0.66 | 0.64 |
| Age, years                               |   |                       |                      |                      | 0.45 |
| <60                                      | 1 | 0.84(0.30,2.33) 0.74  | 0.52(0.23,1.21) 0.13 | 1.21(0.50,2.95) 0.67 | 0.87 |
| ≥60                                      | 1 | 0.83(0.61,1.12) 0.23  | 1.01(0.72,1.43) 0.95 | 0.99(0.69,1.44) 0.98 | 0.68 |
| BMI, kg/m2                               |   |                       |                      |                      | 0.26 |
| Normal weight (<25)                      | 1 | 1.04(0.62,1.77) 0.87  | 1.12(0.63,2.01) 0.70 | 1.67(0.87,3.19) 0.12 | 0.11 |
| Overweight (25-30)                       | 1 | 0.72(0.44,1.18) 0.20  | 0.97(0.58,1.63) 0.91 | 1.12(0.65,1.93) 0.68 | 0.44 |
| Obesity (≥30)                            | 1 | 0.82(0.46,1.44) 0.48  | 0.85(0.51,1.43) 0.55 | 0.63(0.34,1.18) 0.15 | 0.22 |
| Race                                     |   |                       |                      |                      | 0.93 |
| Non-Hispanic White                       | 1 | 0.86(0.59,1.26) 0.44  | 0.95(0.66,1.36) 0.78 | 1.00(0.62,1.60) 1.00 | 0.85 |
| Non-Hispanic Black                       | 1 | 0.97(0.49,1.95) 0.94  | 1.10(0.59,2.04) 0.76 | 1.17(0.62,2.24) 0.62 | 0.58 |
| Mexican American                         | 1 | 0.52(0.18,1.48) 0.22  | 0.71(0.21,2.36) 0.58 | 1.41(0.45,4.41) 0.55 | 0.59 |
| Others                                   | 1 | 0.64(0.17,2.45) 0.51  | 1.20(0.40,3.58) 0.74 | 1.15(0.40,3.34) 0.80 | 0.44 |
| Education level                          |   |                       |                      |                      | 0.02 |
| Less than high school                    | 1 | 1.31(0.85,2.00) 0.22  | 1.20(0.77,1.87) 0.41 | 1.00(0.57,1.73) 0.99 | 0.99 |
| High school or equivalent                | 1 | 1.06(0.55,2.06) 0.86  | 0.84(0.45,1.55) 0.57 | 1.46(0.67,3.19) 0.35 | 0.51 |
| College or above                         | 1 | 0.44(0.26,0.76) 0.003 | 0.81(0.50,1.33) 0.41 | 0.83(0.46,1.51) 0.54 | 0.72 |
| Family income-poverty ratio              |   |                       |                      |                      | 0.53 |
| <1.0                                     | 1 | 0.96(0.56,1.63) 0.87  | 0.49(0.29,0.82) 0.01 | 0.61(0.34,1.11) 0.10 | 0.03 |
| 1.0-3.0                                  | 1 | 0.93(0.63,1.37) 0.71  | 1.13(0.77,1.65) 0.53 | 1.26(0.79,2.02) 0.33 | 0.24 |
| >3.0                                     | 1 | 0.70(0.30,1.66) 0.42  | 0.95(0.51,1.76) 0.87 | 1.01(0.51,2.03) 0.97 | 0.63 |
| Smoking status                           |   |                       |                      |                      | 0.66 |
| Never                                    | 1 | 0.85(0.52,1.41) 0.54  | 0.94(0.61,1.47) 0.80 | 0.85(0.51,1.40) 0.52 | 0.69 |
| Former                                   | 1 | 0.75(0.45,1.25) 0.27  | 0.96(0.57,1.59) 0.87 | 1.17(0.69,2.00) 0.56 | 0.34 |
| Current                                  | 1 | 1.01(0.56,1.83) 0.96  | 0.74(0.36,1.52) 0.41 | 1.33(0.55,3.20) 0.52 | 0.75 |
| Alcohol drinking                         |   |                       |                      |                      | 0.15 |
| Never                                    | 1 | 0.73(0.47,1.13) 0.16  | 0.83(0.52,1.32) 0.43 | 0.65(0.38,1.09) 0.10 | 0.18 |

|                                          |   |                      |                      |                      |      |
|------------------------------------------|---|----------------------|----------------------|----------------------|------|
| Low to moderate                          | 1 | 0.83(0.47,1.47) 0.53 | 1.02(0.61,1.69) 0.94 | 1.12(0.64,1.94) 0.69 | 0.51 |
| Heavy                                    | 1 | 1.06(0.47,2.35) 0.90 | 0.92(0.35,2.40) 0.86 | 1.98(0.83,4.72) 0.12 | 0.19 |
| Healthy eating index score               |   |                      |                      |                      | 0.67 |
| Quarter 1                                | 1 | 0.76(0.45,1.27) 0.29 | 0.87(0.45,1.66) 0.67 | 0.83(0.37,1.88) 0.66 | 0.56 |
| Quarter 2                                | 1 | 0.68(0.38,1.23) 0.20 | 0.95(0.52,1.71) 0.85 | 1.24(0.54,2.85) 0.61 | 0.50 |
| Quarter 3                                | 1 | 1.10(0.51,2.35) 0.82 | 1.02(0.54,1.91) 0.96 | 0.74(0.39,1.43) 0.37 | 0.30 |
| Quarter 4                                | 1 | 1.32(0.67,2.61) 0.42 | 1.45(0.74,2.84) 0.28 | 2.05(1.06,3.98) 0.03 | 0.02 |
| Total energy intake from diet, kcal      |   |                      |                      |                      | 0.2  |
| [0,1445.5]                               | 1 | 0.90(0.59,1.37) 0.62 | 1.04(0.70,1.53) 0.85 | 0.92(0.57,1.49) 0.74 | 0.94 |
| (1445.5,1908]                            | 1 | 0.86(0.48,1.55) 0.62 | 0.92(0.51,1.67) 0.79 | 1.60(0.86,2.99) 0.14 | 0.10 |
| (1908,2494.5]                            | 1 | 1.14(0.56,2.30) 0.71 | 1.27(0.64,2.50) 0.50 | 0.97(0.43,2.20) 0.94 | 0.98 |
| (2494.5,15594]                           | 1 | 0.36(0.14,0.92) 0.03 | 0.38(0.16,0.91) 0.03 | 0.50(0.18,1.38) 0.18 | 0.40 |
| Self reported health                     |   |                      |                      |                      | 0.76 |
| Very good to excellent                   | 1 | 0.96(0.58,1.59) 0.88 | 0.89(0.53,1.49) 0.66 | 1.02(0.60,1.75) 0.94 | 0.96 |
| Good                                     | 1 | 0.75(0.46,1.23) 0.26 | 0.81(0.48,1.35) 0.42 | 0.96(0.53,1.74) 0.89 | 1    |
| Poor to fair                             | 1 | 0.71(0.40,1.25) 0.23 | 1.06(0.61,1.86) 0.84 | 1.09(0.61,1.95) 0.76 | 0.36 |
| Family history of cardiovascular disease |   |                      |                      |                      | 0.62 |
| No                                       | 1 | 0.83(0.56,1.23) 0.36 | 0.95(0.67,1.35) 0.79 | 1.10(0.72,1.67) 0.67 | 0.50 |
| Yes                                      | 1 | 0.83(0.43,1.59) 0.57 | 0.87(0.48,1.58) 0.64 | 0.77(0.37,1.62) 0.49 | 0.55 |
| Cardiovascular disease                   |   |                      |                      |                      | 0.09 |
| No                                       | 1 | 0.71(0.45,1.11) 0.14 | 0.74(0.49,1.14) 0.17 | 0.87(0.53,1.44) 0.59 | 0.69 |
| Yes                                      | 1 | 1.20(0.78,1.86) 0.41 | 1.59(1.03,2.45) 0.04 | 1.60(0.94,2.71) 0.08 | 0.04 |
| Chronic obstructive pulmonary diseases   |   |                      |                      |                      | 0.57 |
| No                                       | 1 | 0.86(0.63,1.18) 0.36 | 1.02(0.74,1.41) 0.91 | 1.07(0.74,1.56) 0.71 | 0.50 |
| Yes                                      | 1 | 0.72(0.28,1.83) 0.49 | 0.41(0.15,1.09) 0.07 | 1.33(0.48,3.68) 0.58 | 0.70 |
| History of chronic kidney disease        |   |                      |                      |                      | 0.68 |
| No                                       | 1 | 0.86(0.62,1.19) 0.37 | 0.96(0.69,1.32) 0.79 | 1.03(0.69,1.53) 0.90 | 0.74 |
| Yes                                      | 1 | 0.46(0.20,1.09) 0.08 | 0.62(0.19,2.03) 0.43 | 1.08(0.27,4.25) 0.92 | 0.99 |
| Cancer                                   |   |                      |                      |                      | 0.69 |
| No                                       | 1 | 0.91(0.64,1.28) 0.59 | 1.07(0.76,1.50) 0.71 | 1.21(0.79,1.85) 0.38 | 0.28 |
| Yes                                      | 1 | 0.59(0.29,1.18) 0.14 | 0.62(0.30,1.32) 0.22 | 0.51(0.23,1.16) 0.11 | 0.19 |
| <b>Cancer mortality</b>                  |   |                      |                      |                      |      |
| Sex                                      |   |                      |                      |                      | 0.24 |
| Male                                     | 1 | 0.95(0.62,1.44) 0.80 | 1.34(0.90,1.98) 0.15 | 1.06(0.66,1.70) 0.81 | 0.45 |
| Female                                   | 1 | 0.63(0.41,0.98) 0.04 | 0.68(0.43,1.06) 0.08 | 0.52(0.32,0.85) 0.01 | 0.02 |
| Age, years                               |   |                      |                      |                      | 0.62 |
| <60                                      | 1 | 0.74(0.37,1.50) 0.40 | 1.12(0.67,1.88) 0.66 | 0.56(0.26,1.20) 0.13 | 0.25 |
| ≥60                                      | 1 | 0.84(0.60,1.17) 0.30 | 0.98(0.70,1.36) 0.89 | 0.89(0.60,1.33) 0.57 | 0.83 |
| BMI, kg/m2                               |   |                      |                      |                      | 0.61 |
| Normal weight (<25)                      | 1 | 1.25(0.72,2.18) 0.43 | 1.38(0.74,2.59) 0.31 | 1.14(0.57,2.25) 0.71 | 0.71 |
| Overweight (25-30)                       | 1 | 0.80(0.45,1.43) 0.45 | 1.11(0.65,1.88) 0.71 | 0.81(0.41,1.60) 0.54 | 0.82 |
| Obesity (≥30)                            | 1 | 0.63(0.39,1.00) 0.05 | 0.76(0.48,1.21) 0.25 | 0.59(0.35,1.01) 0.05 | 0.12 |
| Race                                     |   |                      |                      |                      | 0.56 |
| Non-Hispanic White                       | 1 | 0.75(0.53,1.06) 0.11 | 0.96(0.70,1.33) 0.82 | 0.80(0.52,1.22) 0.29 | 0.57 |
| Non-Hispanic Black                       | 1 | 1.04(0.50,2.19) 0.91 | 0.94(0.46,1.92) 0.86 | 0.64(0.31,1.31) 0.22 | 0.24 |
| Mexican American                         | 1 | 0.97(0.40,2.31) 0.94 | 0.61(0.21,1.80) 0.37 | 0.73(0.34,1.56) 0.42 | 0.20 |
| Others                                   | 1 | 0.87(0.29,2.68) 0.81 | 2.51(0.64,9.88) 0.19 | 0.89(0.17,4.52) 0.89 | 0.69 |



|                                          |   |                      |                        |                      |      |
|------------------------------------------|---|----------------------|------------------------|----------------------|------|
| Male                                     | 1 | 0.83(0.59,1.18) 0.30 | 0.84(0.56,1.26) 0.40   | 0.81(0.53,1.23) 0.32 | 0.38 |
| Female                                   | 1 | 0.92(0.62,1.34) 0.65 | 0.98(0.68,1.41) 0.92   | 1.44(1.00,2.08) 0.05 | 0.04 |
| Age, years                               |   |                      |                        |                      | 0.35 |
| <60                                      | 1 | 0.63(0.35,1.13) 0.12 | 0.79(0.43,1.45) 0.44   | 1.11(0.63,1.98) 0.72 | 0.70 |
| ≥60                                      | 1 | 0.97(0.71,1.32) 0.83 | 0.92(0.67,1.25) 0.59   | 1.06(0.77,1.46) 0.71 | 0.78 |
| BMI, kg/m <sup>2</sup>                   |   |                      |                        |                      | 0.93 |
| Normal weight (<25)                      | 1 | 0.91(0.54,1.50) 0.70 | 0.80(0.48,1.34) 0.39   | 1.40(0.85,2.31) 0.19 | 0.22 |
| Overweight (25-30)                       | 1 | 0.80(0.52,1.21) 0.28 | 0.84(0.54,1.30) 0.44   | 0.86(0.53,1.42) 0.56 | 0.64 |
| Obesity (≥30)                            | 1 | 0.97(0.65,1.45) 0.89 | 1.03(0.67,1.57) 0.90   | 1.11(0.70,1.76) 0.65 | 0.60 |
| Race                                     |   |                      |                        |                      | 0.49 |
| Non-Hispanic White                       | 1 | 0.86(0.63,1.17) 0.33 | 0.92(0.66,1.28) 0.64   | 1.05(0.76,1.45) 0.76 | 0.64 |
| Non-Hispanic Black                       | 1 | 0.88(0.47,1.64) 0.69 | 0.80(0.39,1.67) 0.56   | 1.15(0.63,2.08) 0.65 | 0.71 |
| Mexican American                         | 1 | 0.66(0.27,1.59) 0.35 | 0.24(0.11,0.55) <0.001 | 0.80(0.30,2.18) 0.67 | 0.36 |
| Others                                   | 1 | 1.22(0.46,3.25) 0.69 | 1.01(0.29,3.53) 0.99   | 1.43(0.49,4.19) 0.51 | 0.56 |
| Education level                          |   |                      |                        |                      | 0.51 |
| Less than high school                    | 1 | 0.94(0.64,1.39) 0.76 | 1.00(0.69,1.44) 0.99   | 0.94(0.61,1.44) 0.78 | 0.85 |
| High school or equivalent                | 1 | 0.77(0.50,1.19) 0.24 | 0.56(0.34,0.92) 0.02   | 0.98(0.64,1.50) 0.93 | 0.56 |
| College or above                         | 1 | 0.85(0.54,1.34) 0.49 | 1.04(0.66,1.63) 0.88   | 1.12(0.70,1.80) 0.62 | 0.39 |
| Family income-poverty ratio              |   |                      |                        |                      | 0.16 |
| <1.0                                     | 1 | 1.31(0.75,2.28) 0.35 | 1.21(0.76,1.92) 0.43   | 1.30(0.80,2.11) 0.28 | 0.32 |
| 1.0-3.0                                  | 1 | 0.93(0.66,1.30) 0.67 | 0.89(0.64,1.22) 0.46   | 0.95(0.68,1.34) 0.78 | 0.72 |
| >3.0                                     | 1 | 0.54(0.33,0.88) 0.01 | 0.72(0.46,1.13) 0.15   | 1.06(0.60,1.85) 0.85 | 0.46 |
| Smoking status                           |   |                      |                        |                      | 0.97 |
| Never                                    | 1 | 0.80(0.52,1.23) 0.30 | 0.74(0.47,1.14) 0.17   | 0.94(0.62,1.41) 0.76 | 0.80 |
| Former                                   | 1 | 0.91(0.63,1.31) 0.60 | 1.04(0.73,1.48) 0.82   | 1.26(0.82,1.93) 0.29 | 0.19 |
| Current                                  | 1 | 0.77(0.46,1.31) 0.33 | 0.76(0.40,1.42) 0.39   | 0.94(0.50,1.80) 0.86 | 0.77 |
| Alcohol drinking                         |   |                      |                        |                      | 0.78 |
| Never                                    | 1 | 0.99(0.63,1.55) 0.96 | 0.89(0.59,1.33) 0.56   | 1.09(0.73,1.62) 0.67 | 0.82 |
| Low to moderate                          | 1 | 0.84(0.57,1.23) 0.36 | 0.84(0.57,1.23) 0.36   | 1.22(0.81,1.82) 0.34 | 0.31 |
| Heavy                                    | 1 | 0.71(0.43,1.17) 0.17 | 1.01(0.54,1.89) 0.98   | 0.70(0.40,1.25) 0.23 | 0.49 |
| Healthy eating index score               |   |                      |                        |                      | 0.36 |
| Quarter 1                                | 1 | 0.53(0.33,0.87) 0.01 | 0.90(0.56,1.44) 0.67   | 0.69(0.33,1.48) 0.34 | 0.29 |
| Quarter 2                                | 1 | 1.12(0.71,1.78) 0.63 | 1.03(0.58,1.82) 0.92   | 1.28(0.73,2.26) 0.38 | 0.51 |
| Quarter 3                                | 1 | 1.26(0.76,2.10) 0.36 | 1.04(0.58,1.87) 0.88   | 1.64(0.94,2.86) 0.08 | 0.13 |
| Quarter 4                                | 1 | 0.73(0.36,1.48) 0.38 | 0.81(0.37,1.76) 0.59   | 0.81(0.39,1.68) 0.57 | 0.80 |
| Total energy intake from diet, kcal      |   |                      |                        |                      | 0.71 |
| [0,1445.5]                               | 1 | 0.91(0.64,1.30) 0.60 | 0.87(0.61,1.23) 0.42   | 1.19(0.77,1.83) 0.44 | 0.72 |
| (1445.5,1908]                            | 1 | 0.79(0.47,1.35) 0.39 | 0.84(0.52,1.35) 0.47   | 1.10(0.65,1.84) 0.72 | 0.66 |
| (1908,2494.5]                            | 1 | 0.94(0.50,1.75) 0.84 | 0.75(0.36,1.58) 0.45   | 1.06(0.49,2.30) 0.88 | 0.93 |
| (2494.5,15594]                           | 1 | 0.80(0.37,1.73) 0.57 | 1.34(0.63,2.86) 0.45   | 1.02(0.55,1.90) 0.95 | 0.58 |
| Self reported health                     |   |                      |                        |                      | 0.04 |
| Very good to excellent                   | 1 | 1.13(0.82,1.57) 0.45 | 1.05(0.71,1.55) 0.82   | 1.51(0.95,2.40) 0.08 | 0.15 |
| Good                                     | 1 | 0.71(0.45,1.13) 0.15 | 0.84(0.53,1.33) 0.45   | 0.72(0.43,1.20) 0.21 | 0.35 |
| Poor to fair                             | 1 | 0.76(0.50,1.16) 0.20 | 0.71(0.45,1.13) 0.15   | 1.01(0.67,1.52) 0.96 | 0.84 |
| Family history of cardiovascular disease |   |                      |                        |                      | 0.33 |
| No                                       | 1 | 0.93(0.67,1.28) 0.64 | 0.84(0.60,1.18) 0.31   | 1.17(0.86,1.60) 0.31 | 0.41 |
| Yes                                      | 1 | 0.72(0.43,1.21) 0.21 | 1.05(0.61,1.79) 0.86   | 0.87(0.47,1.61) 0.65 | 0.99 |

|                                        |   |                      |                       |                       |      |  |      |
|----------------------------------------|---|----------------------|-----------------------|-----------------------|------|--|------|
| Cardiovascular disease                 |   |                      |                       |                       |      |  | 0.21 |
| No                                     | 1 | 0.81(0.60,1.09) 0.16 | 0.97(0.70,1.35) 0.86  | 1.19(0.88,1.61) 0.25  | 0.13 |  |      |
| Yes                                    | 1 | 0.92(0.57,1.49) 0.75 | 0.71(0.45,1.12) 0.14  | 0.75(0.46,1.22) 0.25  | 0.12 |  |      |
| Chronic obstructive pulmonary diseases |   |                      |                       |                       |      |  | 0.02 |
| No                                     | 1 | 0.83(0.62,1.13) 0.23 | 0.84(0.60,1.17) 0.31  | 0.97(0.72,1.30) 0.83  | 0.90 |  |      |
| Yes                                    | 1 | 0.84(0.52,1.35) 0.46 | 1.17(0.62,2.22) 0.63  | 1.75(0.92,3.35) 0.09  | 0.09 |  |      |
| History of chronic kidney disease      |   |                      |                       |                       |      |  | 0.10 |
| No                                     | 1 | 0.85(0.65,1.12) 0.25 | 0.85(0.63,1.13) 0.27  | 1.05(0.80,1.37) 0.74  | 0.75 |  |      |
| Yes                                    | 1 | 2.25(0.52,9.62) 0.28 | 5.26(1.30,21.20) 0.02 | 2.57(0.51,12.87) 0.25 | 0.13 |  |      |
| Cancer                                 |   |                      |                       |                       |      |  | 0.81 |
| No                                     | 1 | 0.87(0.64,1.17) 0.35 | 0.92(0.65,1.29) 0.63  | 1.04(0.76,1.42) 0.80  | 0.71 |  |      |
| Yes                                    | 1 | 0.91(0.54,1.56) 0.74 | 0.85(0.51,1.42) 0.54  | 1.36(0.79,2.33) 0.27  | 0.35 |  |      |

Adjusted for sex, age, race, BMI, educational level, smoking status, drinking status, family income poverty ratio, healthy eating index-2015, total energy intake from the diet, self-reported health status, family history of cardiovascular diseases, self-reported cardiovascular disease, self-reported chronic obstructive pulmonary disease, self-reported chronic kidney disease, and self-reported cancer.

**Supplementary Table 2.9** Subgroup analysis of hazard ratios for vitamin D levels with all-cause and CVD mortality in participants with prediabetes from NHANES 1999-2018

|                                     | Q1 | Q2                   | Q3                   | Q4                     | <i>P</i> <sub>trend</sub> | <i>P</i> <sub>interaction</sub> |
|-------------------------------------|----|----------------------|----------------------|------------------------|---------------------------|---------------------------------|
| <b>All-cause mortality</b>          |    |                      |                      |                        |                           |                                 |
| Sex                                 |    |                      |                      |                        |                           | 0.24                            |
| Male                                | 1  | 1.20(0.85,1.71) 0.30 | 1.48(1.01,2.19) 0.05 | 1.84(1.35,2.50) <0.001 | <0.0001                   |                                 |
| Female                              | 1  | 1.17(0.82,1.66) 0.39 | 0.95(0.70,1.30) 0.76 | 1.42(0.98,2.06) 0.07   | 0.16                      |                                 |
| Age, years                          |    |                      |                      |                        |                           | 0.73                            |
| <60                                 | 1  | 1.01(0.59,1.70) 0.98 | 1.29(0.72,2.32) 0.39 | 1.74(1.02,2.97) 0.04   | 0.03                      |                                 |
| ≥60                                 | 1  | 1.21(0.93,1.57) 0.16 | 1.14(0.87,1.49) 0.34 | 1.54(1.19,2.01) 0.001  | 0.002                     |                                 |
| BMI, kg/m <sup>2</sup>              |    |                      |                      |                        |                           | 0.58                            |
| Normal weight (<25)                 | 1  | 0.88(0.57,1.36) 0.57 | 0.92(0.58,1.45) 0.72 | 1.54(1.03,2.31) 0.03   | 0.02                      |                                 |
| Overweight (25-30)                  | 1  | 1.62(1.03,2.55) 0.04 | 1.51(1.00,2.28) 0.05 | 1.91(1.28,2.85) 0.001  | 0.002                     |                                 |
| Obesity (≥30)                       | 1  | 1.08(0.74,1.57) 0.69 | 1.15(0.74,1.77) 0.54 | 1.47(0.99,2.18) 0.05   | 0.07                      |                                 |
| Race                                |    |                      |                      |                        |                           | 0.92                            |
| Non-Hispanic White                  | 1  | 1.12(0.82,1.52) 0.47 | 1.16(0.85,1.56) 0.35 | 1.55(1.14,2.11) 0.005  | 0.004                     |                                 |
| Non-Hispanic Black                  | 1  | 1.34(0.81,2.23) 0.26 | 1.54(0.96,2.46) 0.07 | 1.83(1.01,3.31) 0.05   | 0.02                      |                                 |
| Mexican American                    | 1  | 0.99(0.39,2.56) 0.99 | 1.13(0.48,2.69) 0.78 | 1.81(0.81,4.03) 0.15   | 0.20                      |                                 |
| Others                              | 1  | 1.74(0.77,3.93) 0.18 | 1.36(0.65,2.82) 0.42 | 2.21(1.00,4.88) 0.05   | 0.08                      |                                 |
| Education level                     |    |                      |                      |                        |                           | 0.67                            |
| Less than high school               | 1  | 1.57(0.92,2.68) 0.10 | 1.22(0.80,1.85) 0.35 | 2.00(1.29,3.10) 0.002  | 0.004                     |                                 |
| High school or equivalent           | 1  | 1.11(0.68,1.80) 0.69 | 1.02(0.64,1.63) 0.94 | 1.14(0.69,1.91) 0.60   | 0.72                      |                                 |
| College or above                    | 1  | 0.98(0.66,1.44) 0.92 | 1.21(0.82,1.78) 0.33 | 1.63(1.13,2.36) 0.01   | 0.004                     |                                 |
| Family income-poverty ratio         |    |                      |                      |                        |                           | 0.65                            |
| <1.0                                | 1  | 1.10(0.60,2.01) 0.77 | 1.25(0.84,1.86) 0.28 | 1.30(0.85,2.00) 0.23   | 0.17                      |                                 |
| 1.0-3.0                             | 1  | 1.09(0.78,1.51) 0.62 | 1.13(0.75,1.70) 0.57 | 1.46(1.01,2.12) 0.05   | 0.05                      |                                 |
| >3.0                                | 1  | 1.53(0.92,2.54) 0.10 | 1.31(0.80,2.16) 0.28 | 2.17(1.27,3.73) 0.005  | 0.01                      |                                 |
| Smoking status                      |    |                      |                      |                        |                           | 0.53                            |
| Never                               | 1  | 1.26(0.82,1.94) 0.30 | 1.28(0.85,1.94) 0.23 | 1.97(1.28,3.03) 0.002  | 0.002                     |                                 |
| Former                              | 1  | 1.14(0.79,1.64) 0.48 | 1.02(0.67,1.56) 0.93 | 1.31(0.93,1.83) 0.12   | 0.23                      |                                 |
| Current                             | 1  | 1.04(0.62,1.73) 0.88 | 1.42(0.75,2.67) 0.28 | 1.58(0.93,2.67) 0.09   | 0.06                      |                                 |
| Alcohol drinking                    |    |                      |                      |                        |                           | 0.98                            |
| Never                               | 1  | 1.28(0.78,2.11) 0.33 | 1.06(0.68,1.66) 0.79 | 1.49(0.97,2.27) 0.07   | 0.17                      |                                 |
| Low to moderate                     | 1  | 1.19(0.83,1.70) 0.34 | 1.33(0.92,1.90) 0.12 | 1.78(1.24,2.55) 0.002  | 0.001                     |                                 |
| Heavy                               | 1  | 1.05(0.62,1.77) 0.85 | 1.10(0.62,1.95) 0.75 | 1.47(0.89,2.41) 0.13   | 0.13                      |                                 |
| Healthy eating index score          |    |                      |                      |                        |                           | 0.30                            |
| Quarter 1                           | 1  | 0.88(0.59,1.32) 0.54 | 0.90(0.52,1.56) 0.72 | 0.81(0.46,1.45) 0.48   | 0.51                      |                                 |
| Quarter 2                           | 1  | 1.12(0.69,1.81) 0.64 | 1.36(0.82,2.24) 0.23 | 1.58(0.99,2.52) 0.05   | 0.04                      |                                 |
| Quarter 3                           | 1  | 1.33(0.79,2.23) 0.28 | 1.57(0.88,2.82) 0.13 | 2.29(1.28,4.08) 0.005  | 0.004                     |                                 |
| Quarter 4                           | 1  | 1.86(1.07,3.24) 0.03 | 1.44(0.90,2.32) 0.13 | 2.12(1.21,3.73) 0.01   | 0.03                      |                                 |
| Total energy intake from diet, kcal |    |                      |                      |                        |                           | 0.01                            |
| [0,1445.5]                          | 1  | 1.25(0.84,1.88) 0.27 | 0.63(0.40,1.00) 0.05 | 1.02(0.67,1.56) 0.92   | 0.35                      |                                 |
| (1445.5,1908]                       | 1  | 1.31(0.81,2.12) 0.28 | 1.42(0.92,2.19) 0.12 | 2.03(1.18,3.49) 0.01   | 0.01                      |                                 |
| (1908,2494.5]                       | 1  | 1.23(0.71,2.15) 0.46 | 1.36(0.80,2.32) 0.26 | 2.17(1.29,3.64) 0.003  | 0.002                     |                                 |
| (2494.5,15594]                      | 1  | 0.79(0.37,1.70) 0.55 | 1.95(0.97,3.95) 0.06 | 1.54(0.84,2.84) 0.16   | 0.01                      |                                 |
| Self reported health                |    |                      |                      |                        |                           | 0.07                            |
| Very good to excellent              | 1  | 0.78(0.50,1.22) 0.28 | 1.02(0.71,1.46) 0.91 | 1.33(0.87,2.03) 0.19   | 0.08                      |                                 |

|                                          |   |                       |                      |                         |         |
|------------------------------------------|---|-----------------------|----------------------|-------------------------|---------|
| Good                                     | 1 | 1.60(1.17,2.19) 0.003 | 0.98(0.66,1.44) 0.90 | 1.38(0.93,2.03) 0.11    | 0.71    |
| Poor to fair                             | 1 | 1.30(0.76,2.23) 0.33  | 1.61(0.96,2.72) 0.07 | 2.20(1.41,3.43) <0.001  | <0.001  |
| Family history of cardiovascular disease |   |                       |                      |                         | 0.35    |
| No                                       | 1 | 1.28(0.96,1.72) 0.10  | 1.36(1.00,1.84) 0.05 | 1.84(1.39,2.43) <0.0001 | <0.0001 |
| Yes                                      | 1 | 0.93(0.53,1.62) 0.79  | 0.82(0.50,1.33) 0.42 | 1.10(0.58,2.10) 0.77    | 0.91    |
| Cardiovascular disease                   |   |                       |                      |                         | 0.73    |
| No                                       | 1 | 1.24(0.93,1.65) 0.14  | 1.18(0.90,1.55) 0.23 | 1.73(1.31,2.30) <0.001  | <0.001  |
| Yes                                      | 1 | 0.97(0.61,1.53) 0.88  | 1.08(0.63,1.85) 0.78 | 1.21(0.71,2.04) 0.48    | 0.39    |
| Chronic obstructive pulmonary diseases   |   |                       |                      |                         | 0.96    |
| No                                       | 1 | 1.20(0.92,1.56) 0.17  | 1.19(0.92,1.55) 0.18 | 1.68(1.30,2.15) <0.0001 | <0.0001 |
| Yes                                      | 1 | 0.90(0.41,1.97) 0.79  | 0.90(0.45,1.79) 0.76 | 1.16(0.58,2.30) 0.67    | 0.67    |
| History of chronic kidney disease        |   |                       |                      |                         | 0.81    |
| No                                       | 1 | 1.21(0.93,1.59) 0.16  | 1.23(0.96,1.58) 0.10 | 1.64(1.28,2.10) <0.0001 | <0.001  |
| Yes                                      | 1 | 0.60(0.22,1.63) 0.32  | 0.80(0.30,2.14) 0.66 | 1.44(0.62,3.30) 0.40    | 0.20    |
| Cancer                                   |   |                       |                      |                         | 0.60    |
| No                                       | 1 | 1.31(0.99,1.74) 0.06  | 1.30(0.93,1.80) 0.12 | 1.73(1.29,2.30) <0.001  | <0.001  |
| Yes                                      | 1 | 0.80(0.43,1.49) 0.48  | 0.90(0.56,1.44) 0.65 | 1.30(0.74,2.26) 0.36    | 0.26    |
| <b>CVD mortality</b>                     |   |                       |                      |                         |         |
| Sex                                      |   |                       |                      |                         | 0.01    |
| Male                                     | 1 | 2.08(1.00,4.30) 0.05  | 2.74(1.20,6.29) 0.02 | 3.33(1.40,7.91) 0.01    | 0.003   |
| Female                                   | 1 | 1.24(0.69,2.23) 0.48  | 0.69(0.36,1.33) 0.27 | 1.15(0.56,2.34) 0.70    | 0.88    |
| Age, years                               |   |                       |                      |                         | 0.29    |
| <60                                      | 1 | 1.94(0.61,6.15) 0.26  | 0.92(0.27,3.08) 0.89 | 3.52(0.96,12.88) 0.06   | 0.08    |
| ≥60                                      | 1 | 1.40(0.86,2.30) 0.18  | 1.52(0.88,2.64) 0.13 | 1.74(0.96,3.16) 0.07    | 0.07    |
| BMI, kg/m2                               |   |                       |                      |                         | 0.85    |
| Normal weight (<25)                      | 1 | 0.95(0.47,1.92) 0.89  | 1.35(0.57,3.18) 0.50 | 1.70(0.70,4.14) 0.24    | 0.16    |
| Overweight (25-30)                       | 1 | 2.33(1.03,5.25) 0.04  | 2.40(1.01,5.72) 0.05 | 3.95(1.82,8.56) <0.001  | 0.001   |
| Obesity (≥30)                            | 1 | 1.38(0.74,2.60) 0.31  | 1.10(0.44,2.73) 0.84 | 1.48(0.63,3.48) 0.37    | 0.50    |
| Race                                     |   |                       |                      |                         | 0.83    |
| Non-Hispanic White                       | 1 | 1.47(0.82,2.65) 0.20  | 1.53(0.79,2.96) 0.20 | 1.85(0.86,3.95) 0.11    | 0.11    |
| Non-Hispanic Black                       | 1 | 1.74(0.55,5.47) 0.34  | 1.69(0.58,4.95) 0.34 | 2.18(0.60,7.93) 0.24    | 0.23    |
| Mexican American                         | 1 | 1.58(0.24,10.55) 0.64 | 1.44(0.30,6.97) 0.65 | 12.37(1.84,82.99) 0.01  | 0.003   |
| Others                                   | 1 | 2.01(0.38,10.54) 0.41 | 0.98(0.30,3.17) 0.97 | 3.19(0.69,14.79) 0.14   | 0.22    |
| Education level                          |   |                       |                      |                         | 0.32    |
| Less than high school                    | 1 | 2.51(1.17,5.39) 0.02  | 1.54(0.65,3.63) 0.32 | 3.13(1.32,7.40) 0.01    | 0.04    |
| High school or equivalent                | 1 | 1.67(0.72,3.87) 0.23  | 1.06(0.44,2.59) 0.89 | 2.50(0.87,7.20) 0.09    | 0.18    |
| College or above                         | 1 | 0.96(0.46,2.01) 0.91  | 1.44(0.72,2.86) 0.30 | 1.36(0.66,2.79) 0.40    | 0.22    |
| Family income-poverty ratio              |   |                       |                      |                         | 0.11    |
| <1.0                                     | 1 | 1.37(0.60,3.13) 0.45  | 1.55(0.75,3.21) 0.24 | 1.08(0.41,2.84) 0.87    | 0.82    |
| 1.0-3.0                                  | 1 | 1.80(0.96,3.38) 0.07  | 1.35(0.76,2.42) 0.30 | 1.67(0.84,3.34) 0.14    | 0.35    |
| >3.0                                     | 1 | 1.28(0.46,3.51) 0.64  | 1.38(0.50,3.82) 0.54 | 3.20(1.00,10.21) 0.05   | 0.02    |
| Smoking status                           |   |                       |                      |                         | 0.31    |
| Never                                    | 1 | 1.49(0.65,3.45) 0.35  | 1.31(0.66,2.59) 0.44 | 3.01(1.27,7.13) 0.01    | 0.01    |
| Former                                   | 1 | 1.23(0.58,2.61) 0.59  | 1.49(0.73,3.02) 0.27 | 1.25(0.63,2.49) 0.52    | 0.44    |
| Current                                  | 1 | 2.52(0.90,7.06) 0.08  | 2.01(0.73,5.49) 0.18 | 1.78(0.58,5.49) 0.32    | 0.44    |
| Alcohol drinking                         |   |                       |                      |                         | 0.73    |
| Never                                    | 1 | 1.98(0.84,4.68) 0.12  | 1.22(0.57,2.65) 0.61 | 1.87(0.72,4.85) 0.20    | 0.46    |

|                                          |   |                         |                       |                        |         |
|------------------------------------------|---|-------------------------|-----------------------|------------------------|---------|
| Low to moderate                          | 1 | 1.42(0.75,2.69) 0.28    | 1.82(0.81,4.07) 0.15  | 2.53(1.25,5.11) 0.01   | 0.004   |
| Heavy                                    | 1 | 1.16(0.43,3.13) 0.76    | 1.19(0.44,3.19) 0.73  | 1.28(0.49,3.38) 0.61   | 0.64    |
| Healthy eating index score               |   |                         |                       |                        | 0.79    |
| Quarter 1                                | 1 | 1.02(0.44,2.39) 0.97    | 1.33(0.53,3.32) 0.54  | 1.50(0.54,4.14) 0.43   | 0.35    |
| Quarter 2                                | 1 | 1.85(0.67,5.12) 0.23    | 2.65(1.03,6.84) 0.04  | 3.81(1.47,9.93) 0.01   | 0.01    |
| Quarter 3                                | 1 | 1.43(0.62,3.30) 0.40    | 1.04(0.38,2.85) 0.95  | 2.16(0.71,6.60) 0.17   | 0.21    |
| Quarter 4                                | 1 | 1.45(0.51,4.11) 0.48    | 1.26(0.50,3.15) 0.62  | 1.16(0.44,3.05) 0.76   | 0.98    |
| Total energy intake from diet, kcal      |   |                         |                       |                        | 0.04    |
| [0,1445.5]                               | 1 | 1.65(0.90,3.01) 0.10    | 0.40(0.18,0.91) 0.03  | 1.21(0.56,2.63) 0.63   | 0.55    |
| (1445.5,1908]                            | 1 | 1.66(0.65,4.26) 0.29    | 2.28(1.00,5.18) 0.05  | 2.89(1.15,7.28) 0.02   | 0.01    |
| (1908,2494.5]                            | 1 | 1.99(0.54,7.38) 0.30    | 1.66(0.45,6.04) 0.44  | 3.15(0.93,10.63) 0.06  | 0.05    |
| (2494.5,15594]                           | 1 | 0.51(0.11,2.28) 0.38    | 2.02(0.72,5.68) 0.18  | 1.70(0.63,4.63) 0.30   | 0.10    |
| Self reported health                     |   |                         |                       |                        | 0.26    |
| Very good to excellent                   | 1 | 1.42(0.66,3.06) 0.37    | 2.13(1.08,4.18) 0.03  | 2.17(1.04,4.53) 0.04   | 0.03    |
| Good                                     | 1 | 1.22(0.59,2.50) 0.59    | 0.69(0.28,1.71) 0.42  | 1.04(0.41,2.65) 0.93   | 0.80    |
| Poor to fair                             | 1 | 2.00(0.78,5.09) 0.15    | 1.97(0.83,4.66) 0.12  | 3.59(1.39,9.29) 0.01   | 0.01    |
| Family history of cardiovascular disease |   |                         |                       |                        | 0.13    |
| No                                       | 1 | 1.61(0.98,2.62) 0.06    | 1.89(1.17,3.07) 0.01  | 2.45(1.38,4.36) 0.002  | 0.001   |
| Yes                                      | 1 | 0.99(0.37,2.64) 0.99    | 0.59(0.21,1.62) 0.30  | 0.93(0.33,2.62) 0.89   | 0.67    |
| Cardiovascular disease                   |   |                         |                       |                        | 0.40    |
| No                                       | 1 | 1.65(0.93,2.91) 0.09    | 1.23(0.69,2.19) 0.48  | 2.13(1.11,4.08) 0.02   | 0.05    |
| Yes                                      | 1 | 1.12(0.51,2.44) 0.79    | 1.55(0.58,4.12) 0.38  | 1.57(0.62,3.94) 0.34   | 0.24    |
| Chronic obstructive pulmonary diseases   |   |                         |                       |                        | 0.30    |
| No                                       | 1 | 1.47(0.89,2.43) 0.13    | 1.29(0.79,2.11) 0.31  | 1.97(1.07,3.61) 0.03   | 0.04    |
| Yes                                      | 1 | 0.84(0.12,5.90) 0.86    | 2.75(0.49,15.60) 0.25 | 5.52(0.56,54.11) 0.14  | 0.12    |
| History of chronic kidney disease        |   |                         |                       |                        | 0.06    |
| No                                       | 1 | 1.76(1.11,2.81) 0.02    | 1.61(0.97,2.69) 0.07  | 2.17(1.22,3.88) 0.01   | 0.02    |
| Yes                                      | 1 | 1.04(1.01,1.60) 0.01    | 1.29(1.14,1.59)<0.001 | 3.88(1.90,7.91) <0.001 | <0.0001 |
| Cancer                                   |   |                         |                       |                        | 0.42    |
| No                                       | 1 | 1.60(0.97,2.65) 0.07    | 1.25(0.74,2.11) 0.41  | 2.17(1.15,4.10) 0.02   | 0.03    |
| Yes                                      | 1 | 0.97(0.26,3.59) 0.96    | 1.39(0.45,4.32) 0.57  | 1.29(0.38,4.36) 0.68   | 0.60    |
| <b>Cancer mortality</b>                  |   |                         |                       |                        |         |
| Sex                                      |   |                         |                       |                        | 0.71    |
| Male                                     | 1 | 1.05(0.54,2.03) 0.89    | 1.08(0.49,2.37) 0.85  | 1.39(0.68,2.84) 0.37   | 0.37    |
| Female                                   | 1 | 1.45(0.77,2.73) 0.25    | 0.96(0.48,1.89) 0.90  | 1.20(0.59,2.44) 0.62   | 0.93    |
| Age, years                               |   |                         |                       |                        | 0.19    |
| <60                                      | 1 | 0.73(0.31,1.77) 0.49    | 1.44(0.54,3.88) 0.47  | 1.38(0.54,3.58) 0.50   | 0.33    |
| ≥60                                      | 1 | 1.43(0.86,2.39) 0.17    | 0.86(0.49,1.50) 0.60  | 1.28(0.76,2.16) 0.36   | 0.84    |
| BMI, kg/m2                               |   |                         |                       |                        | 0.59    |
| Normal weight (<25)                      | 1 | 1.10(0.44,2.73) 0.84    | 0.67(0.23,1.94) 0.46  | 1.44(0.57,3.66) 0.44   | 0.57    |
| Overweight (25-30)                       | 1 | 1.81(0.75,4.37) 0.19    | 1.94(0.87,4.34) 0.11  | 1.46(0.56,3.80) 0.44   | 0.60    |
| Obesity (≥30)                            | 1 | 1.03(0.49,2.16) 0.93    | 0.73(0.28,1.87) 0.51  | 1.22(0.60,2.50) 0.58   | 0.82    |
| Race                                     |   |                         |                       |                        | 0.35    |
| Non-Hispanic White                       | 1 | 1.13(0.64,1.99) 0.68    | 1.01(0.52,1.93) 0.99  | 1.31(0.75,2.30) 0.34   | 0.45    |
| Non-Hispanic Black                       | 1 | 1.19(0.38,3.70) 0.76    | 1.15(0.36,3.73) 0.81  | 1.25(0.33,4.75) 0.75   | 0.75    |
| Mexican American                         | 1 | 0.37(0.06,2.22) 0.28    | 0.48(0.12,1.84) 0.28  | 0.59(0.12,2.95) 0.52   | 0.61    |
| Others                                   | 1 | 7.62(2.40,24.19) <0.001 | 3.26(0.98,10.85) 0.05 | 3.87(1.12,13.41) 0.03  | 0.42    |





|                                          |   |                      |                       |                        |        |
|------------------------------------------|---|----------------------|-----------------------|------------------------|--------|
| Male                                     | 1 | 0.99(0.62,1.59) 0.97 | 1.28(0.77,2.11) 0.34  | 1.45(0.88,2.41) 0.15   | 0.09   |
| Female                                   | 1 | 0.96(0.54,1.74) 0.90 | 1.10(0.68,1.77) 0.70  | 1.60(0.94,2.70) 0.08   | 0.06   |
| Age, years                               |   |                      |                       |                        | 0.92   |
| <60                                      | 1 | 0.98(0.41,2.34) 0.97 | 1.26(0.61,2.58) 0.53  | 1.42(0.71,2.86) 0.32   | 0.23   |
| ≥60                                      | 1 | 0.96(0.61,1.49) 0.84 | 1.12(0.78,1.61) 0.55  | 1.49(1.06,2.10) 0.02   | 0.005  |
| BMI, kg/m <sup>2</sup>                   |   |                      |                       |                        | 0.42   |
| Normal weight (<25)                      | 1 | 0.70(0.34,1.41) 0.32 | 0.86(0.49,1.52) 0.61  | 1.46(0.89,2.41) 0.14   | 0.06   |
| Overweight (25-30)                       | 1 | 1.32(0.71,2.47) 0.38 | 1.01(0.59,1.72) 0.98  | 1.56(0.78,3.14) 0.21   | 0.34   |
| Obesity (≥30)                            | 1 | 0.87(0.46,1.66) 0.67 | 1.56(0.82,2.96) 0.18  | 1.52(0.78,2.98) 0.22   | 0.09   |
| Race                                     |   |                      |                       |                        | 0.99   |
| Non-Hispanic White                       | 1 | 0.92(0.57,1.50) 0.74 | 1.06(0.70,1.61) 0.79  | 1.42(0.93,2.17) 0.10   | 0.06   |
| Non-Hispanic Black                       | 1 | 1.23(0.54,2.77) 0.62 | 1.70(0.78,3.72) 0.18  | 1.91(0.68,5.41) 0.22   | 0.16   |
| Mexican American                         | 1 | 1.89(0.38,9.42) 0.44 | 2.33(0.57, 9.49) 0.24 | 2.52(0.53,12.04) 0.25  | 0.24   |
| Others                                   | 1 | 0.82(0.24,2.89) 0.76 | 1.28(0.52,3.16) 0.59  | 1.54(0.51,4.69) 0.44   | 0.32   |
| Education level                          |   |                      |                       |                        | 0.81   |
| Less than high school                    | 1 | 1.45(0.64,3.28) 0.37 | 1.32(0.75,2.32) 0.34  | 1.75(1.02,2.99) 0.04   | 0.03   |
| High school or equivalent                | 1 | 0.73(0.33,1.60) 0.44 | 0.70(0.38,1.27) 0.24  | 0.81(0.38,1.72) 0.58   | 0.65   |
| College or above                         | 1 | 0.88(0.53,1.47) 0.62 | 1.33(0.72,2.44) 0.36  | 1.77(0.97,3.22) 0.06   | 0.04   |
| Family income-poverty ratio              |   |                      |                       |                        | 0.46   |
| <1.0                                     | 1 | 1.67(0.61,4.57) 0.32 | 1.87(0.96,3.62) 0.07  | 2.19(1.17,4.11) 0.01   | 0.01   |
| 1.0-3.0                                  | 1 | 0.63(0.38,1.05) 0.08 | 1.03(0.64,1.63) 0.91  | 1.12(0.68,1.84) 0.65   | 0.26   |
| >3.0                                     | 1 | 1.45(0.68,3.12) 0.34 | 1.12(0.49,2.57) 0.79  | 1.88(0.84,4.21) 0.12   | 0.20   |
| Smoking status                           |   |                      |                       |                        | 0.17   |
| Never                                    | 1 | 1.36(0.66,2.79) 0.40 | 1.40(0.79,2.47) 0.25  | 2.15(1.21,3.82) 0.01   | 0.01   |
| Former                                   | 1 | 0.86(0.51,1.46) 0.59 | 0.84(0.50,1.42) 0.52  | 1.06(0.67,1.70) 0.79   | 0.81   |
| Current                                  | 1 | 0.75(0.33,1.69) 0.49 | 1.75(0.81,3.78) 0.15  | 1.61(0.76,3.41) 0.21   | 0.08   |
| Alcohol drinking                         |   |                      |                       |                        | 0.62   |
| Never                                    | 1 | 0.98(0.42,2.26) 0.96 | 1.00(0.51,1.95) 1.00  | 1.49(0.80,2.81) 0.21   | 0.18   |
| Low to moderate                          | 1 | 0.88(0.53,1.47) 0.63 | 1.37(0.85,2.20) 0.20  | 1.63(1.01,2.63) 0.05   | 0.01   |
| Heavy                                    | 1 | 1.23(0.56,2.70) 0.60 | 0.94(0.38,2.34) 0.90  | 1.30(0.61,2.79) 0.50   | 0.64   |
| Healthy eating index score               |   |                      |                       |                        | 0.02   |
| Quarter 1                                | 1 | 0.55(0.30,0.99) 0.05 | 0.72(0.34,1.51) 0.39  | 0.60(0.31,1.16) 0.13   | 0.14   |
| Quarter 2                                | 1 | 1.05(0.57,1.93) 0.88 | 1.29(0.61,2.73) 0.51  | 1.19(0.60,2.36) 0.62   | 0.54   |
| Quarter 3                                | 1 | 2.28(0.99,5.27) 0.05 | 2.64(1.21,5.75) 0.01  | 2.74(1.04,7.25) 0.04   | 0.09   |
| Quarter 4                                | 1 | 2.39(1.27,4.51) 0.01 | 2.18(1.17,4.03) 0.01  | 4.25(2.20,8.22)<0.0001 | <0.001 |
| Total energy intake from diet, kcal      |   |                      |                       |                        | 0.05   |
| [0,1445.5]                               | 1 | 1.18(0.60,2.31) 0.63 | 0.76(0.37,1.56) 0.45  | 1.30(0.73,2.32) 0.38   | 0.75   |
| (1445.5,1908]                            | 1 | 1.18(0.60,2.33) 0.63 | 1.01(0.48,2.12) 0.97  | 1.79(0.86,3.72) 0.12   | 0.20   |
| (1908,2494.5]                            | 1 | 0.90(0.39,2.08) 0.80 | 1.93(0.87,4.28) 0.11  | 2.19(1.09,4.41) 0.03   | 0.004  |
| (2494.5,15594]                           | 1 | 0.49(0.21,1.14) 0.10 | 1.51(0.64,3.58) 0.35  | 1.00(0.48,2.05) 0.99   | 0.37   |
| Self reported health                     |   |                      |                       |                        | 0.16   |
| Very good to excellent                   | 1 | 0.76(0.34,1.74) 0.52 | 1.09(0.63,1.88) 0.76  | 1.48(0.79,2.75) 0.22   | 0.09   |
| Good                                     | 1 | 1.71(0.85,3.44) 0.13 | 0.95(0.51,1.75) 0.86  | 1.89(1.01,3.54) 0.05   | 0.21   |
| Poor to fair                             | 1 | 0.69(0.31,1.54) 0.36 | 1.37(0.69,2.72) 0.36  | 1.21(0.61,2.41) 0.59   | 0.25   |
| Family history of cardiovascular disease |   |                      |                       |                        | 0.73   |
| No                                       | 1 | 1.13(0.69,1.85) 0.63 | 1.28(0.83,1.96) 0.26  | 1.72(1.11,2.66) 0.01   | 0.01   |
| Yes                                      | 1 | 0.71(0.27,1.87) 0.49 | 0.97(0.46,2.05) 0.93  | 1.22(0.51,2.96) 0.65   | 0.52   |

|                                        |   |                      |                      |                      |       |  |      |
|----------------------------------------|---|----------------------|----------------------|----------------------|-------|--|------|
| Cardiovascular disease                 |   |                      |                      |                      |       |  | 0.95 |
| No                                     | 1 | 1.06(0.64,1.75) 0.82 | 1.19(0.82,1.73) 0.36 | 1.68(1.09,2.59) 0.02 | 0.01  |  |      |
| Yes                                    | 1 | 0.81(0.37,1.77) 0.60 | 1.07(0.53,2.19) 0.85 | 1.16(0.56,2.37) 0.69 | 0.47  |  |      |
| Chronic obstructive pulmonary diseases |   |                      |                      |                      |       |  | 0.90 |
| No                                     | 1 | 1.06(0.69,1.64) 0.78 | 1.19(0.79,1.79) 0.39 | 1.62(1.10,2.38) 0.01 | 0.01  |  |      |
| Yes                                    | 1 | 0.53(0.19,1.44) 0.21 | 0.80(0.33,1.94) 0.63 | 0.84(0.37,1.88) 0.67 | 0.96  |  |      |
| History of chronic kidney disease      |   |                      |                      |                      |       |  | 0.84 |
| No                                     | 1 | 0.98(0.62,1.55) 0.92 | 1.20(0.83,1.73) 0.34 | 1.50(1.02,2.20) 0.04 | 0.01  |  |      |
| Yes                                    | 1 | 1.56(0.21,2.37) 0.66 | 2.29(0.20,5.69) 0.50 | 5.65(0.44,7.48) 0.16 | 0.10  |  |      |
| Cancer                                 |   |                      |                      |                      |       |  | 0.75 |
| No                                     | 1 | 1.11(0.69,1.79) 0.66 | 1.37(0.87,2.15) 0.17 | 1.67(1.13,2.49) 0.01 | 0.005 |  |      |
| Yes                                    | 1 | 0.79(0.30,2.06) 0.63 | 0.92(0.39,2.13) 0.84 | 1.23(0.55,2.71) 0.62 | 0.56  |  |      |

Adjusted for sex, age, race, BMI, educational level, smoking status, drinking status, family income poverty ratio, healthy eating index-2015, total energy intake from the diet, self-reported health status, family history of cardiovascular diseases, self-reported cardiovascular disease, self-reported chronic obstructive pulmonary disease, self-reported chronic kidney disease, and self-reported cancer.

**Supplementary Table 2.10** Subgroup analysis of hazard ratios for vitamin E levels with all-cause and CVD mortality in participants with prediabetes from NHANES 1999-2018

|                                     | Q1 | Q2                   | Q3                     | Q4                    | <i>P</i> <sub>trend</sub> | <i>P</i> <sub>interaction</sub> |
|-------------------------------------|----|----------------------|------------------------|-----------------------|---------------------------|---------------------------------|
| <b>All-cause mortality</b>          |    |                      |                        |                       |                           |                                 |
| Sex                                 |    |                      |                        |                       |                           | 0.27                            |
| Male                                | 1  | 0.98(0.77,1.26) 0.89 | 0.75(0.57,0.98) 0.04   | 0.75(0.55,1.00) 0.05  | 0.01                      |                                 |
| Female                              | 1  | 1.04(0.87,1.24) 0.69 | 1.08(0.85,1.37) 0.54   | 1.06(0.80,1.41) 0.67  | 0.57                      |                                 |
| Age, years                          |    |                      |                        |                       |                           | 1                               |
| <60                                 | 1  | 0.97(0.67,1.40) 0.87 | 0.85(0.56,1.30) 0.46   | 0.89(0.54,1.48) 0.66  | 0.57                      |                                 |
| ≥60                                 | 1  | 1.02(0.87,1.19) 0.83 | 0.87(0.72,1.04) 0.13   | 0.85(0.67,1.08) 0.17  | 0.09                      |                                 |
| BMI, kg/m <sup>2</sup>              |    |                      |                        |                       |                           | 0.8                             |
| Normal weight (<25)                 | 1  | 1.18(0.87,1.61) 0.30 | 0.96(0.68,1.34) 0.79   | 1.02(0.70,1.50) 0.90  | 0.81                      |                                 |
| Overweight (25-30)                  | 1  | 0.81(0.61,1.07) 0.14 | 0.80(0.59,1.10) 0.17   | 0.71(0.49,1.03) 0.07  | 0.09                      |                                 |
| Obesity (≥30)                       | 1  | 1.06(0.83,1.37) 0.63 | 0.85(0.63,1.15) 0.30   | 0.85(0.60,1.21) 0.38  | 0.20                      |                                 |
| Race                                |    |                      |                        |                       |                           | 0.37                            |
| Non-Hispanic White                  | 1  | 1.00(0.82,1.21) 0.98 | 0.85(0.68,1.06) 0.14   | 0.85(0.65,1.11) 0.24  | 0.14                      |                                 |
| Non-Hispanic Black                  | 1  | 1.07(0.77,1.49) 0.69 | 1.00(0.66,1.50) 0.98   | 1.07(0.66,1.74) 0.78  | 0.84                      |                                 |
| Mexican American                    | 1  | 0.83(0.50,1.37) 0.47 | 0.68(0.35,1.32) 0.26   | 0.75(0.33,1.68) 0.48  | 0.38                      |                                 |
| Others                              | 1  | 1.15(0.63,2.11) 0.66 | 1.52(0.82,2.81) 0.18   | 0.59(0.26,1.37) 0.22  | 0.56                      |                                 |
| Education level                     |    |                      |                        |                       |                           | 0.02                            |
| Less than high school               | 1  | 0.93(0.72,1.19) 0.56 | 0.95(0.71,1.28) 0.76   | 1.26(0.91,1.76) 0.17  | 0.28                      |                                 |
| High school or equivalent           | 1  | 1.16(0.86,1.57) 0.33 | 0.90(0.67,1.19) 0.45   | 1.08(0.74,1.58) 0.69  | 0.95                      |                                 |
| College or above                    | 1  | 0.91(0.65,1.27) 0.58 | 0.72(0.52,0.99) 0.04   | 0.58(0.41,0.83) 0.002 | <0.001                    |                                 |
| Family income-poverty ratio         |    |                      |                        |                       |                           | 0.1                             |
| <1.0                                | 1  | 0.84(0.62,1.13) 0.25 | 1.05(0.76,1.45) 0.77   | 1.22(0.76,1.96) 0.41  | 0.39                      |                                 |
| 1.0-3.0                             | 1  | 1.02(0.84,1.23) 0.85 | 0.91(0.73,1.13) 0.38   | 0.91(0.68,1.22) 0.55  | 0.38                      |                                 |
| >3.0                                | 1  | 1.05(0.72,1.51) 0.81 | 0.76(0.53,1.10) 0.14   | 0.73(0.47,1.11) 0.14  | 0.04                      |                                 |
| Smoking status                      |    |                      |                        |                       |                           | 0.02                            |
| Never                               | 1  | 1.15(0.91,1.44) 0.25 | 1.09(0.85,1.39) 0.50   | 1.03(0.73,1.44) 0.87  | 0.92                      |                                 |
| Former                              | 1  | 0.90(0.72,1.14) 0.38 | 0.64(0.50,0.83) <0.001 | 0.67(0.51,0.88) 0.004 | <0.001                    |                                 |
| Current                             | 1  | 0.90(0.63,1.31) 0.60 | 0.99(0.65,1.51) 0.96   | 0.93(0.57,1.52) 0.77  | 0.84                      |                                 |
| Alcohol drinking                    |    |                      |                        |                       |                           | 0.36                            |
| Never                               | 1  | 1.11(0.90,1.38) 0.32 | 1.16(0.89,1.51) 0.26   | 0.95(0.67,1.36) 0.78  | 0.98                      |                                 |
| Low to moderate                     | 1  | 0.93(0.74,1.17) 0.54 | 0.72(0.55,0.95) 0.02   | 0.74(0.53,1.03) 0.08  | 0.03                      |                                 |
| Heavy                               | 1  | 0.98(0.68,1.40) 0.89 | 0.86(0.59,1.24) 0.42   | 1.05(0.70,1.58) 0.81  | 1                         |                                 |
| Healthy eating index score          |    |                      |                        |                       |                           | 0.03                            |
| Quarter 1                           | 1  | 0.82(0.59,1.14) 0.24 | 1.09(0.78,1.51) 0.62   | 1.12(0.64,1.96) 0.68  | 0.60                      |                                 |
| Quarter 2                           | 1  | 1.17(0.91,1.51) 0.23 | 0.72(0.49,1.06) 0.10   | 0.87(0.59,1.29) 0.49  | 0.21                      |                                 |
| Quarter 3                           | 1  | 1.09(0.76,1.56) 0.63 | 0.90(0.66,1.23) 0.51   | 1.26(0.83,1.91) 0.27  | 0.46                      |                                 |
| Quarter 4                           | 1  | 1.00(0.70,1.42) 1.00 | 0.85(0.61,1.19) 0.34   | 0.59(0.39,0.89) 0.01  | 0.004                     |                                 |
| Total energy intake from diet, kcal |    |                      |                        |                       |                           | 0.52                            |
| [0,1445.5]                          | 1  | 1.10(0.89,1.36) 0.38 | 0.86(0.63,1.17) 0.34   | 0.98(0.61,1.56) 0.92  | 0.69                      |                                 |
| (1445.5,1908]                       | 1  | 0.85(0.62,1.18) 0.34 | 0.92(0.68,1.25) 0.59   | 0.69(0.48,1.01) 0.06  | 0.12                      |                                 |
| (1908,2494.5]                       | 1  | 0.99(0.65,1.49) 0.94 | 0.71(0.49,1.05) 0.09   | 0.89(0.56,1.42) 0.63  | 0.37                      |                                 |
| (2494.5,15594]                      | 1  | 1.17(0.66,2.08) 0.59 | 1.04(0.61,1.79) 0.88   | 0.98(0.59,1.64) 0.94  | 0.55                      |                                 |
| Self reported health                |    |                      |                        |                       |                           | 0.01                            |
| Very good to excellent              | 1  | 0.94(0.73,1.22) 0.64 | 0.84(0.61,1.15) 0.27   | 1.17(0.83,1.65) 0.36  | 0.61                      |                                 |

|                                          |   |                      |                       |                       |      |
|------------------------------------------|---|----------------------|-----------------------|-----------------------|------|
| Good                                     | 1 | 0.89(0.67,1.20) 0.45 | 0.91(0.66,1.26) 0.57  | 0.75(0.50,1.12) 0.16  | 0.21 |
| Poor to fair                             | 1 | 1.12(0.86,1.46) 0.39 | 0.84(0.61,1.16) 0.29  | 0.77(0.57,1.05) 0.10  | 0.03 |
| Family history of cardiovascular disease |   |                      |                       |                       | 0.90 |
| No                                       | 1 | 1.02(0.84,1.24) 0.82 | 0.90(0.73,1.10) 0.31  | 0.91(0.70,1.18) 0.48  | 0.32 |
| Yes                                      | 1 | 0.98(0.72,1.33) 0.90 | 0.87(0.63,1.20) 0.40  | 0.74(0.48,1.16) 0.19  | 0.12 |
| Cardiovascular disease                   |   |                      |                       |                       | 0.11 |
| No                                       | 1 | 0.92(0.75,1.13) 0.42 | 0.80(0.64,0.99) 0.04  | 0.86(0.66,1.13) 0.29  | 0.16 |
| Yes                                      | 1 | 1.20(0.93,1.55) 0.17 | 1.11(0.80,1.53) 0.53  | 0.88(0.63,1.24) 0.47  | 0.42 |
| Chronic obstructive pulmonary diseases   |   |                      |                       |                       | 0.13 |
| No                                       | 1 | 1.04(0.86,1.24) 0.71 | 0.87(0.70,1.07) 0.18  | 0.86(0.69,1.09) 0.22  | 0.10 |
| Yes                                      | 1 | 0.76(0.50,1.15) 0.19 | 0.93(0.60,1.44) 0.73  | 0.76(0.44,1.32) 0.33  | 0.45 |
| History of chronic kidney disease        |   |                      |                       |                       | 0.63 |
| No                                       | 1 | 1.01(0.85,1.20) 0.90 | 0.88(0.73,1.07) 0.20  | 0.85(0.67,1.07) 0.17  | 0.09 |
| Yes                                      | 1 | 0.76(0.33,1.76) 0.52 | 0.54(0.21,1.39) 0.20  | 0.97(0.42,2.23) 0.94  | 0.73 |
| Cancer                                   |   |                      |                       |                       | 0.46 |
| No                                       | 1 | 1.03(0.85,1.25) 0.77 | 0.92(0.75,1.14) 0.46  | 0.84(0.64,1.10) 0.21  | 0.16 |
| Yes                                      | 1 | 0.96(0.71,1.30) 0.81 | 0.73(0.49,1.09) 0.13  | 0.95(0.64,1.39) 0.78  | 0.55 |
| <b>CVD mortality</b>                     |   |                      |                       |                       |      |
| Sex                                      |   |                      |                       |                       | 0.16 |
| Male                                     | 1 | 0.97(0.66,1.42) 0.87 | 0.70(0.46,1.08) 0.11  | 1.10(0.68,1.77) 0.70  | 0.87 |
| Female                                   | 1 | 1.18(0.82,1.69) 0.37 | 1.45(0.94,2.23) 0.09  | 1.30(0.72,2.32) 0.38  | 0.21 |
| Age, years                               |   |                      |                       |                       | 0.58 |
| <60                                      | 1 | 1.58(0.76,3.29) 0.22 | 1.49(0.71,3.14) 0.29  | 3.17(1.27,7.93) 0.01  | 0.04 |
| ≥60                                      | 1 | 0.99(0.76,1.28) 0.92 | 0.91(0.64,1.30) 0.61  | 1.04(0.68,1.58) 0.86  | 0.98 |
| BMI, kg/m2                               |   |                      |                       |                       | 0.92 |
| Normal weight (<25)                      | 1 | 1.24(0.79,1.93) 0.35 | 1.04(0.56,1.91) 0.90  | 1.15(0.57,2.30) 0.70  | 0.85 |
| Overweight (25-30)                       | 1 | 1.01(0.67,1.51) 0.98 | 0.99(0.58,1.67) 0.96  | 1.02(0.59,1.75) 0.95  | 0.97 |
| Obesity (≥30)                            | 1 | 0.99(0.61,1.62) 0.98 | 1.02(0.56,1.88) 0.95  | 1.57(0.78,3.15) 0.20  | 0.24 |
| Race                                     |   |                      |                       |                       | 0.17 |
| Non-Hispanic White                       | 1 | 1.05(0.79,1.40) 0.72 | 0.95(0.67,1.36) 0.79  | 1.20(0.77,1.87) 0.42  | 0.56 |
| Non-Hispanic Black                       | 1 | 1.17(0.70,1.96) 0.56 | 0.63(0.28,1.40) 0.26  | 1.28(0.52,3.16) 0.59  | 0.89 |
| Mexican American                         | 1 | 0.87(0.34,2.22) 0.77 | 1.42(0.35,5.83) 0.63  | 3.94(0.81,19.19) 0.09 | 0.15 |
| Others                                   | 1 | 0.96(0.34,2.72) 0.94 | 4.00(1.07,14.98) 0.04 | 1.30(0.32,5.38) 0.72  | 0.20 |
| Education level                          |   |                      |                       |                       | 0.05 |
| Less than high school                    | 1 | 0.81(0.55,1.21) 0.31 | 1.16(0.70,1.90) 0.57  | 2.15(1.26,3.67) 0.005 | 0.01 |
| High school or equivalent                | 1 | 1.21(0.72,2.03) 0.48 | 0.88(0.50,1.57) 0.67  | 1.74(0.85,3.59) 0.13  | 0.25 |
| College or above                         | 1 | 1.03(0.66,1.59) 0.91 | 0.80(0.48,1.35) 0.41  | 0.67(0.38,1.18) 0.17  | 0.10 |
| Family income-poverty ratio              |   |                      |                       |                       | 0.05 |
| <1.0                                     | 1 | 1.00(0.55,1.81) 1.00 | 1.30(0.62,2.72) 0.49  | 2.54(1.35,4.78) 0.004 | 0.01 |
| 1.0-3.0                                  | 1 | 1.00(0.73,1.39) 0.98 | 1.08(0.71,1.66) 0.71  | 1.38(0.86,2.20) 0.18  | 0.20 |
| >3.0                                     | 1 | 0.98(0.54,1.76) 0.94 | 0.71(0.40,1.27) 0.25  | 0.72(0.33,1.58) 0.41  | 0.32 |
| Smoking status                           |   |                      |                       |                       | 0.08 |
| Never                                    | 1 | 1.18(0.83,1.68) 0.35 | 1.43(0.98,2.11) 0.07  | 1.30(0.76,2.23) 0.34  | 0.23 |
| Former                                   | 1 | 0.82(0.51,1.30) 0.40 | 0.50(0.30,0.82) 0.01  | 0.70(0.42,1.19) 0.19  | 0.10 |
| Current                                  | 1 | 1.29(0.71,2.34) 0.40 | 1.14(0.53,2.48) 0.73  | 2.58(1.27,5.23) 0.01  | 0.02 |
| Alcohol drinking                         |   |                      |                       |                       | 0.10 |
| Never                                    | 1 | 0.95(0.66,1.38) 0.79 | 1.35(0.87,2.08) 0.18  | 1.11(0.62,1.99) 0.71  | 0.38 |

|                                          |   |                      |                       |                        |         |
|------------------------------------------|---|----------------------|-----------------------|------------------------|---------|
| Low to moderate                          | 1 | 1.15(0.79,1.67) 0.48 | 0.84(0.55,1.30) 0.44  | 1.08(0.55,2.09) 0.83   | 0.91    |
| Heavy                                    | 1 | 1.05(0.54,2.05) 0.89 | 0.77(0.41,1.46) 0.42  | 2.03(1.06,3.89) 0.03   | 0.10    |
| Healthy eating index score               |   |                      |                       |                        | 0.11    |
| Quarter 1                                | 1 | 0.85(0.52,1.40) 0.52 | 1.23(0.64,2.36) 0.54  | 3.29(1.52,7.11) 0.002  | 0.02    |
| Quarter 2                                | 1 | 1.35(0.78,2.33) 0.29 | 1.03(0.57,1.89) 0.91  | 0.92(0.46,1.82) 0.80   | 0.73    |
| Quarter 3                                | 1 | 0.78(0.48,1.26) 0.31 | 0.83(0.46,1.50) 0.53  | 1.46(0.76,2.84) 0.26   | 0.26    |
| Quarter 4                                | 1 | 1.42(0.84,2.40) 0.19 | 1.08(0.62,1.89) 0.79  | 0.95(0.52,1.76) 0.88   | 0.45    |
| Total energy intake from diet, kcal      |   |                      |                       |                        | 0.01    |
| [0,1445.5]                               | 1 | 1.06(0.77,1.47) 0.73 | 1.07(0.64,1.77) 0.80  | 0.75(0.38,1.47) 0.41   | 0.70    |
| (1445.5,1908]                            | 1 | 0.90(0.56,1.47) 0.69 | 1.47(0.90,2.41) 0.12  | 1.03(0.54,1.97) 0.93   | 0.32    |
| (1908,2494.5]                            | 1 | 1.30(0.73,2.33) 0.38 | 1.15(0.65,2.03) 0.64  | 2.12(1.06,4.26) 0.03   | 0.06    |
| (2494.5,15594]                           | 1 | 1.18(0.37,3.71) 0.78 | 0.24(0.08,0.71) 0.01  | 0.76(0.26,2.19) 0.61   | 0.46    |
| Self reported health                     |   |                      |                       |                        | < 0.001 |
| Very good to excellent                   | 1 | 1.05(0.72,1.54) 0.80 | 0.74(0.46,1.19) 0.21  | 2.43(1.45,4.07) <0.001 | 0.01    |
| Good                                     | 1 | 0.99(0.63,1.56) 0.98 | 0.91(0.57,1.47) 0.71  | 0.90(0.49,1.63) 0.72   | 0.65    |
| Poor to fair                             | 1 | 1.04(0.66,1.63) 0.87 | 1.27(0.78,2.06) 0.34  | 0.90(0.49,1.64) 0.73   | 0.98    |
| Family history of cardiovascular disease |   |                      |                       |                        | 0.25    |
| No                                       | 1 | 0.93(0.71,1.22) 0.61 | 0.91(0.65,1.26) 0.57  | 1.17(0.78,1.74) 0.45   | 0.52    |
| Yes                                      | 1 | 1.55(1.03,2.33) 0.03 | 1.38(0.77,2.46) 0.27  | 1.49(0.67,3.33) 0.33   | 0.46    |
| Cardiovascular disease                   |   |                      |                       |                        | 0.82    |
| No                                       | 1 | 0.97(0.73,1.30) 0.85 | 1.00(0.69,1.46) 0.99  | 1.26(0.75,2.09) 0.38   | 0.42    |
| Yes                                      | 1 | 1.16(0.77,1.75) 0.47 | 0.94(0.54,1.64) 0.83  | 1.16(0.72,1.89) 0.54   | 0.80    |
| Chronic obstructive pulmonary diseases   |   |                      |                       |                        | 0.81    |
| No                                       | 1 | 1.07(0.83,1.38) 0.60 | 0.99(0.71,1.37) 0.93  | 1.18(0.81,1.73) 0.39   | 0.53    |
| Yes                                      | 1 | 1.16(0.41,3.28) 0.78 | 1.18(0.34,4.08) 0.79  | 1.47(0.54,4.02) 0.45   | 0.47    |
| History of chronic kidney disease        |   |                      |                       |                        | 0.07    |
| No                                       | 1 | 1.04(0.82,1.33) 0.74 | 1.03(0.76,1.41) 0.84  | 1.20(0.81,1.78) 0.37   | 0.44    |
| Yes                                      | 1 | 0.92(0.26,3.32) 0.90 | 0.14(0.01,1.80) 0.13  | 1.33(0.21,8.31) 0.76   | 0.85    |
| Cancer                                   |   |                      |                       |                        | 0.80    |
| No                                       | 1 | 1.05(0.79,1.40) 0.75 | 0.97(0.70,1.33) 0.83  | 1.22(0.79,1.89) 0.37   | 0.50    |
| Yes                                      | 1 | 1.16(0.64,2.11) 0.62 | 1.31(0.61,2.79) 0.49  | 1.56(0.71,3.39) 0.27   | 0.30    |
| <b>Cancer mortality</b>                  |   |                      |                       |                        |         |
| Sex                                      |   |                      |                       |                        | 0.66    |
| Male                                     | 1 | 0.86(0.58,1.28) 0.45 | 0.63(0.41,0.98) 0.04  | 0.61(0.38,0.96) 0.03   | 0.01    |
| Female                                   | 1 | 1.17(0.80,1.72) 0.42 | 1.08(0.67,1.75) 0.75  | 0.89(0.53,1.49) 0.66   | 0.75    |
| Age, years                               |   |                      |                       |                        | 0.66    |
| <60                                      | 1 | 1.01(0.57,1.77) 0.98 | 0.85(0.43,1.67) 0.64  | 0.51(0.24,1.09) 0.08   | 0.06    |
| ≥60                                      | 1 | 1.02(0.74,1.40) 0.91 | 0.77(0.55,1.07) 0.12  | 0.82(0.57,1.19) 0.30   | 0.15    |
| BMI, kg/m2                               |   |                      |                       |                        | 0.09    |
| Normal weight (<25)                      | 1 | 1.74(1.00,3.02) 0.05 | 1.07(0.59,1.96) 0.82  | 1.27(0.66,2.44) 0.47   | 0.97    |
| Overweight (25-30)                       | 1 | 0.56(0.32,0.97) 0.04 | 0.66(0.36,1.22) 0.18  | 0.46(0.23,0.90) 0.02   | 0.05    |
| Obesity (≥30)                            | 1 | 1.13(0.69,1.86) 0.63 | 0.74(0.39,1.42) 0.37  | 0.68(0.39,1.18) 0.17   | 0.10    |
| Race                                     |   |                      |                       |                        | 0.21    |
| Non-Hispanic White                       | 1 | 1.07(0.77,1.50) 0.68 | 0.76(0.50,1.16) 0.20  | 0.74(0.49,1.12) 0.15   | 0.05    |
| Non-Hispanic Black                       | 1 | 0.93(0.50,1.75) 0.83 | 1.33(0.68,2.62) 0.41  | 0.80(0.30,2.17) 0.67   | 0.93    |
| Mexican American                         | 1 | 0.46(0.19,1.11) 0.09 | 0.16(0.04,0.62) 0.01  | 0.30(0.07,1.36) 0.12   | 0.10    |
| Others                                   | 1 | 1.03(0.29,3.71) 0.96 | 2.80(0.75,10.46) 0.13 | 1.01(0.27,3.84) 0.99   | 0.50    |



|                                          |   |                      |                      |                      |      |
|------------------------------------------|---|----------------------|----------------------|----------------------|------|
| Male                                     | 1 | 1.07(0.70,1.64) 0.76 | 0.86(0.55,1.34) 0.50 | 0.61(0.39,0.98) 0.04 | 0.01 |
| Female                                   | 1 | 0.90(0.67,1.22) 0.51 | 0.89(0.63,1.25) 0.49 | 1.01(0.66,1.54) 0.97 | 0.85 |
| Age, years                               |   |                      |                      |                      | 0.73 |
| <60                                      | 1 | 0.80(0.46,1.38) 0.43 | 0.68(0.36,1.30) 0.24 | 0.79(0.39,1.59) 0.51 | 0.44 |
| ≥60                                      | 1 | 1.04(0.80,1.35) 0.77 | 0.90(0.70,1.16) 0.41 | 0.72(0.52,1.00) 0.05 | 0.02 |
| BMI, kg/m <sup>2</sup>                   |   |                      |                      |                      | 0.83 |
| Normal weight (<25)                      | 1 | 0.96(0.60,1.53) 0.85 | 0.85(0.57,1.26) 0.42 | 0.88(0.54,1.44) 0.60 | 0.47 |
| Overweight (25-30)                       | 1 | 0.87(0.55,1.36) 0.54 | 0.80(0.49,1.31) 0.37 | 0.71(0.39,1.28) 0.25 | 0.24 |
| Obesity (≥30)                            | 1 | 1.06(0.73,1.54) 0.74 | 0.80(0.49,1.29) 0.36 | 0.58(0.34,0.98) 0.04 | 0.03 |
| Race                                     |   |                      |                      |                      | 0.81 |
| Non-Hispanic White                       | 1 | 0.92(0.67,1.27) 0.61 | 0.83(0.60,1.14) 0.24 | 0.72(0.50,1.05) 0.09 | 0.08 |
| Non-Hispanic Black                       | 1 | 1.11(0.68,1.80) 0.68 | 1.02(0.57,1.83) 0.94 | 1.12(0.59,2.13) 0.73 | 0.78 |
| Mexican American                         | 1 | 1.09(0.52,2.29) 0.81 | 0.95(0.40,2.24) 0.90 | 0.50(0.18,1.43) 0.20 | 0.30 |
| Others                                   | 1 | 1.14(0.47,2.78) 0.77 | 0.54(0.25,1.17) 0.12 | 0.23(0.05,1.03) 0.05 | 0.01 |
| Education level                          |   |                      |                      |                      | 0.63 |
| Less than high school                    | 1 | 1.14(0.77,1.67) 0.51 | 0.94(0.63,1.41) 0.77 | 0.84(0.45,1.58) 0.59 | 0.54 |
| High school or equivalent                | 1 | 1.17(0.79,1.75) 0.44 | 0.84(0.57,1.25) 0.39 | 0.82(0.50,1.34) 0.43 | 0.25 |
| College or above                         | 1 | 0.75(0.45,1.26) 0.27 | 0.71(0.43,1.16) 0.17 | 0.60(0.34,1.07) 0.08 | 0.09 |
| Family income-poverty ratio              |   |                      |                      |                      | 0.19 |
| <1.0                                     | 1 | 0.82(0.52,1.31) 0.41 | 1.04(0.69,1.58) 0.85 | 1.17(0.52,2.65) 0.70 | 0.68 |
| 1.0-3.0                                  | 1 | 1.12(0.81,1.55) 0.51 | 0.97(0.71,1.32) 0.84 | 0.80(0.54,1.20) 0.28 | 0.21 |
| >3.0                                     | 1 | 0.80(0.46,1.39) 0.43 | 0.59(0.34,1.03) 0.06 | 0.56(0.30,1.05) 0.07 | 0.04 |
| Smoking status                           |   |                      |                      |                      | 0.48 |
| Never                                    | 1 | 1.20(0.83,1.72) 0.33 | 0.86(0.57,1.29) 0.47 | 1.03(0.61,1.75) 0.91 | 0.78 |
| Former                                   | 1 | 1.01(0.74,1.36) 0.97 | 0.92(0.62,1.39) 0.70 | 0.71(0.47,1.07) 0.10 | 0.11 |
| Current                                  | 1 | 0.69(0.39,1.23) 0.21 | 0.73(0.39,1.35) 0.31 | 0.52(0.26,1.03) 0.06 | 0.09 |
| Alcohol drinking                         |   |                      |                      |                      | 0.78 |
| Never                                    | 1 | 1.17(0.86,1.59) 0.32 | 1.08(0.73,1.60) 0.70 | 0.90(0.51,1.59) 0.71 | 0.78 |
| Low to moderate                          | 1 | 0.83(0.56,1.24) 0.36 | 0.70(0.48,1.03) 0.07 | 0.67(0.43,1.05) 0.08 | 0.04 |
| Heavy                                    | 1 | 0.96(0.56,1.66) 0.88 | 0.84(0.46,1.55) 0.58 | 0.67(0.33,1.39) 0.29 | 0.29 |
| Healthy eating index score               |   |                      |                      |                      | 0.16 |
| Quarter 1                                | 1 | 0.86(0.48,1.56) 0.63 | 1.42(0.84,2.42) 0.19 | 1.07(0.51,2.26) 0.86 | 0.50 |
| Quarter 2                                | 1 | 1.17(0.83,1.66) 0.38 | 0.60(0.33,1.08) 0.09 | 0.72(0.40,1.30) 0.28 | 0.11 |
| Quarter 3                                | 1 | 1.24(0.72,2.12) 0.44 | 0.94(0.54,1.62) 0.82 | 1.18(0.63,2.20) 0.60 | 0.86 |
| Quarter 4                                | 1 | 0.76(0.43,1.33) 0.34 | 0.67(0.38,1.16) 0.15 | 0.41(0.22,0.79) 0.01 | 0.01 |
| Total energy intake from diet, kcal      |   |                      |                      |                      | 0.47 |
| [0,1445.5]                               | 1 | 1.23(0.86,1.76) 0.25 | 0.81(0.49,1.33) 0.40 | 1.10(0.50,2.38) 0.82 | 0.98 |
| (1445.5,1908]                            | 1 | 0.81(0.49,1.33) 0.40 | 0.62(0.40,0.96) 0.03 | 0.60(0.36,1.00) 0.05 | 0.01 |
| (1908,2494.5]                            | 1 | 0.89(0.45,1.73) 0.73 | 0.63(0.34,1.19) 0.15 | 0.65(0.31,1.37) 0.26 | 0.14 |
| (2494.5,15594]                           | 1 | 0.92(0.33,2.59) 0.88 | 1.35(0.60,3.00) 0.47 | 0.86(0.36,2.05) 0.74 | 0.71 |
| Self reported health                     |   |                      |                      |                      | 0.42 |
| Very good to excellent                   | 1 | 1.00(0.65,1.55) 0.99 | 0.96(0.63,1.48) 0.87 | 0.77(0.46,1.28) 0.32 | 0.32 |
| Good                                     | 1 | 0.85(0.53,1.38) 0.52 | 0.85(0.51,1.39) 0.51 | 0.70(0.37,1.29) 0.25 | 0.28 |
| Poor to fair                             | 1 | 0.99(0.64,1.52) 0.96 | 0.71(0.45,1.11) 0.13 | 0.72(0.44,1.17) 0.19 | 0.10 |
| Family history of cardiovascular disease |   |                      |                      |                      | 0.47 |
| No                                       | 1 | 1.12(0.82,1.53) 0.49 | 0.93(0.69,1.26) 0.65 | 0.84(0.58,1.22) 0.36 | 0.25 |
| Yes                                      | 1 | 0.70(0.43,1.14) 0.15 | 0.73(0.44,1.22) 0.23 | 0.57(0.31,1.05) 0.07 | 0.07 |



|                                        |   |                      |                      |                      |      |  |      |
|----------------------------------------|---|----------------------|----------------------|----------------------|------|--|------|
| Cardiovascular disease                 |   |                      |                      |                      |      |  | 0.03 |
| No                                     | 1 | 0.82(0.60,1.13) 0.22 | 0.68(0.50,0.92) 0.01 | 0.70(0.49,1.02) 0.06 | 0.03 |  |      |
| Yes                                    | 1 | 1.49(0.92,2.39) 0.10 | 1.54(0.99,2.39) 0.05 | 0.91(0.53,1.56) 0.73 | 0.89 |  |      |
| Chronic obstructive pulmonary diseases |   |                      |                      |                      |      |  | 0.10 |
| No                                     | 1 | 1.00(0.72,1.37) 0.99 | 0.82(0.61,1.10) 0.18 | 0.72(0.51,1.02) 0.06 | 0.03 |  |      |
| Yes                                    | 1 | 0.66(0.37,1.20) 0.18 | 0.96(0.57,1.64) 0.89 | 0.83(0.42,1.66) 0.61 | 0.79 |  |      |
| History of chronic kidney disease      |   |                      |                      |                      |      |  | 0.95 |
| No                                     | 1 | 0.97(0.74,1.29) 0.85 | 0.84(0.64,1.10) 0.20 | 0.73(0.53,1.00) 0.05 | 0.03 |  |      |
| Yes                                    | 1 | 1.06(0.26,4.31) 0.93 | 0.48(0.07,3.26) 0.45 | 0.55(0.06,4.81) 0.59 | 0.49 |  |      |
| Cancer                                 |   |                      |                      |                      |      |  | 0.87 |
| No                                     | 1 | 1.02(0.75,1.39) 0.91 | 0.88(0.66,1.18) 0.39 | 0.77(0.54,1.10) 0.16 | 0.11 |  |      |
| Yes                                    | 1 | 0.79(0.48,1.30) 0.35 | 0.64(0.35,1.16) 0.14 | 0.62(0.32,1.20) 0.15 | 0.12 |  |      |

Adjusted for sex, age, race, BMI, educational level, smoking status, drinking status, family income poverty ratio, healthy eating index-2015, total energy intake from the diet, self-reported health status, family history of cardiovascular diseases, self-reported cardiovascular disease, self-reported chronic obstructive pulmonary disease, self-reported chronic kidney disease, and self-reported cancer.

**Supplementary Table 2.11** Subgroup analysis of hazard ratios for vitamin K levels with all-cause and CVD mortality in participants with prediabetes from NHANES 1999-2018

|                                          | Q1 | Q2                   | Q3                    | Q4                    | <i>P</i> <sub>trend</sub> | <i>P</i> <sub>interaction</sub> |
|------------------------------------------|----|----------------------|-----------------------|-----------------------|---------------------------|---------------------------------|
| <b>All-cause mortality</b>               |    |                      |                       |                       |                           |                                 |
| Sex                                      |    |                      |                       |                       |                           | 0.47                            |
| Male                                     | 1  | 1.06(0.85,1.33) 0.60 | 0.97(0.76,1.23) 0.79  | 0.81(0.61,1.09) 0.16  | 0.12                      |                                 |
| Female                                   | 1  | 0.86(0.69,1.08) 0.19 | 0.74(0.58,0.93) 0.01  | 0.72(0.57,0.92) 0.01  | 0.003                     |                                 |
| Age, years                               |    |                      |                       |                       |                           | 0.73                            |
| <60                                      | 1  | 1.07(0.71,1.61) 0.76 | 0.78(0.51,1.20) 0.26  | 0.81(0.50,1.32) 0.40  | 0.20                      |                                 |
| ≥60                                      | 1  | 0.95(0.81,1.12) 0.53 | 0.89(0.75,1.05) 0.17  | 0.76(0.63,0.93) 0.01  | 0.01                      |                                 |
| BMI, kg/m <sup>2</sup>                   |    |                      |                       |                       |                           | 0.91                            |
| Normal weight (<25)                      | 1  | 0.97(0.73,1.30) 0.86 | 0.82(0.60,1.13) 0.23  | 0.76(0.54,1.07) 0.12  | 0.07                      |                                 |
| Overweight (25-30)                       | 1  | 0.95(0.73,1.24) 0.71 | 0.80(0.62,1.03) 0.08  | 0.78(0.56,1.09) 0.14  | 0.08                      |                                 |
| Obesity (≥30)                            | 1  | 1.01(0.76,1.34) 0.97 | 0.93(0.66,1.31) 0.69  | 0.71(0.50,1.02) 0.06  | 0.08                      |                                 |
| Race                                     |    |                      |                       |                       |                           | 0.62                            |
| Non-Hispanic White                       | 1  | 0.93(0.76,1.15) 0.51 | 0.83(0.67,1.02) 0.08  | 0.72(0.56,0.92) 0.01  | 0.003                     |                                 |
| Non-Hispanic Black                       | 1  | 1.13(0.78,1.63) 0.51 | 0.85(0.59,1.24) 0.40  | 1.05(0.68,1.61) 0.82  | 0.86                      |                                 |
| Mexican American                         | 1  | 1.70(0.94,3.06) 0.08 | 1.40(0.73,2.70) 0.32  | 0.75(0.30,1.84) 0.53  | 0.68                      |                                 |
| Others                                   | 1  | 1.34(0.76,2.35) 0.31 | 1.15(0.65,2.06) 0.63  | 0.98(0.44,2.17) 0.96  | 0.85                      |                                 |
| Education level                          |    |                      |                       |                       |                           | 0.03                            |
| Less than high school                    | 1  | 0.81(0.60,1.08) 0.15 | 0.75(0.57,0.98) 0.03  | 1.09(0.81,1.47) 0.57  | 0.95                      |                                 |
| High school or equivalent                | 1  | 1.01(0.71,1.44) 0.97 | 0.76(0.52,1.11) 0.16  | 0.76(0.51,1.13) 0.18  | 0.08                      |                                 |
| College or above                         | 1  | 1.12(0.84,1.50) 0.43 | 0.93(0.70,1.24) 0.63  | 0.67(0.48,0.93) 0.02  | 0.003                     |                                 |
| Family income-poverty ratio              |    |                      |                       |                       |                           | 0.12                            |
| <1.0                                     | 1  | 1.02(0.74,1.40) 0.92 | 0.59(0.40,0.87) 0.01  | 0.75(0.49,1.16) 0.20  | 0.06                      |                                 |
| 1.0-3.0                                  | 1  | 1.14(0.92,1.40) 0.23 | 0.99(0.80,1.24) 0.96  | 0.98(0.78,1.25) 0.90  | 0.66                      |                                 |
| >3.0                                     | 1  | 0.82(0.59,1.14) 0.24 | 0.81(0.57,1.14) 0.22  | 0.60(0.42,0.86) 0.005 | 0.01                      |                                 |
| Smoking status                           |    |                      |                       |                       |                           | 0.19                            |
| Never                                    | 1  | 0.95(0.72,1.26) 0.74 | 0.97(0.71,1.31) 0.84  | 0.76(0.55,1.04) 0.08  | 0.11                      |                                 |
| Former                                   | 1  | 1.07(0.85,1.35) 0.56 | 0.80(0.63,1.02) 0.08  | 0.69(0.52,0.93) 0.01  | 0.002                     |                                 |
| Current                                  | 1  | 0.81(0.56,1.17) 0.26 | 0.65(0.42,1.00) 0.05  | 0.92(0.56,1.49) 0.73  | 0.43                      |                                 |
| Alcohol drinking                         |    |                      |                       |                       |                           | 0.49                            |
| Never                                    | 1  | 1.11(0.85,1.46) 0.43 | 0.86(0.68,1.10) 0.24  | 0.96(0.71,1.31) 0.81  | 0.40                      |                                 |
| Low to moderate                          | 1  | 0.89(0.69,1.16) 0.40 | 0.88(0.67,1.15) 0.34  | 0.65(0.47,0.91) 0.01  | 0.01                      |                                 |
| Heavy                                    | 1  | 0.89(0.61,1.30) 0.56 | 0.78(0.55,1.09) 0.15  | 0.76(0.49,1.18) 0.22  | 0.15                      |                                 |
| Healthy eating index score               |    |                      |                       |                       |                           | 0.13                            |
| Quarter 1                                | 1  | 1.10(0.80,1.52) 0.57 | 0.81(0.59,1.12) 0.20  | 0.91(0.56,1.48) 0.71  | 0.37                      |                                 |
| Quarter 2                                | 1  | 0.68(0.48,0.98) 0.04 | 0.63(0.46,0.85) 0.003 | 0.78(0.53,1.15) 0.21  | 0.07                      |                                 |
| Quarter 3                                | 1  | 1.06(0.78,1.44) 0.69 | 0.98(0.68,1.42) 0.93  | 1.02(0.69,1.49) 0.94  | 0.92                      |                                 |
| Quarter 4                                | 1  | 1.12(0.78,1.62) 0.53 | 0.99(0.67,1.44) 0.94  | 0.64(0.44,0.93) 0.02  | 0.002                     |                                 |
| Total energy intake from diet, kcal      |    |                      |                       |                       |                           | 0.98                            |
| [0,1445.5]                               | 1  | 0.90(0.69,1.16) 0.41 | 0.70(0.53,0.94) 0.02  | 0.73(0.55,0.98) 0.03  | 0.01                      |                                 |
| (1445.5,1908]                            | 1  | 0.98(0.72,1.35) 0.92 | 0.88(0.63,1.23) 0.47  | 0.86(0.58,1.28) 0.45  | 0.36                      |                                 |
| (1908,2494.5]                            | 1  | 1.24(0.84,1.82) 0.29 | 1.09(0.74,1.62) 0.67  | 0.84(0.55,1.28) 0.41  | 0.28                      |                                 |
| (2494.5,15594]                           | 1  | 0.93(0.58,1.49) 0.76 | 0.83(0.52,1.33) 0.44  | 0.72(0.43,1.20) 0.20  | 0.16                      |                                 |
| Self reported health                     |    |                      |                       |                       |                           | 0.13                            |
| Very good to excellent                   | 1  | 0.98(0.74,1.29) 0.89 | 0.84(0.61,1.14) 0.26  | 0.93(0.67,1.30) 0.67  | 0.46                      |                                 |
| Good                                     | 1  | 1.10(0.85,1.42) 0.46 | 0.80(0.61,1.04) 0.10  | 0.78(0.55,1.13) 0.19  | 0.07                      |                                 |
| Poor to fair                             | 1  | 0.87(0.64,1.17) 0.34 | 0.92(0.66,1.27) 0.60  | 0.67(0.46,0.97) 0.03  | 0.05                      |                                 |
| Family history of cardiovascular disease |    |                      |                       |                       |                           | 0.69                            |
| No                                       | 1  | 1.00(0.81,1.22) 0.97 | 0.91(0.74,1.13) 0.42  | 0.78(0.60,1.01) 0.06  | 0.03                      |                                 |
| Yes                                      | 1  | 0.99(0.71,1.38) 0.96 | 0.74(0.55,0.99) 0.04  | 0.77(0.56,1.06) 0.11  | 0.03                      |                                 |
| Cardiovascular disease                   |    |                      |                       |                       |                           | 0.89                            |
| No                                       | 1  | 0.96(0.79,1.17) 0.69 | 0.88(0.71,1.08) 0.21  | 0.77(0.60,0.99) 0.04  | 0.02                      |                                 |
| Yes                                      | 1  | 1.10(0.86,1.42) 0.44 | 0.89(0.69,1.15) 0.37  | 0.82(0.57,1.18) 0.28  | 0.15                      |                                 |
| Chronic obstructive pulmonary diseases   |    |                      |                       |                       |                           | 0.92                            |

|                                          |   |                 |      |                 |      |                 |      |       |
|------------------------------------------|---|-----------------|------|-----------------|------|-----------------|------|-------|
| No                                       | 1 | 0.98(0.81,1.18) | 0.80 | 0.87(0.73,1.04) | 0.12 | 0.79(0.64,0.97) | 0.02 | 0.01  |
| Yes                                      | 1 | 0.85(0.54,1.32) | 0.46 | 0.71(0.44,1.16) | 0.17 | 0.65(0.36,1.15) | 0.14 | 0.12  |
| History of chronic kidney disease        |   |                 |      |                 |      |                 |      | 0.17  |
| No                                       | 1 | 0.99(0.83,1.17) | 0.88 | 0.86(0.71,1.04) | 0.11 | 0.75(0.61,0.92) | 0.01 | 0.002 |
| Yes                                      | 1 | 0.80(0.33,1.99) | 0.64 | 1.10(0.40,3.04) | 0.85 | 1.50(0.59,3.82) | 0.40 | 0.37  |
| Cancer                                   |   |                 |      |                 |      |                 |      | 0.24  |
| No                                       | 1 | 1.06(0.87,1.28) | 0.56 | 0.86(0.69,1.07) | 0.17 | 0.78(0.62,0.99) | 0.04 | 0.01  |
| Yes                                      | 1 | 0.77(0.55,1.08) | 0.13 | 0.83(0.60,1.15) | 0.26 | 0.72(0.49,1.05) | 0.09 | 0.16  |
| <b>CVD mortality</b>                     |   |                 |      |                 |      |                 |      |       |
| Sex                                      |   |                 |      |                 |      |                 |      | 0.74  |
| Male                                     | 1 | 1.13(0.73,1.75) | 0.58 | 1.14(0.76,1.72) | 0.54 | 0.97(0.58,1.62) | 0.91 | 0.91  |
| Female                                   | 1 | 0.77(0.52,1.15) | 0.20 | 0.88(0.56,1.39) | 0.58 | 0.73(0.42,1.26) | 0.25 | 0.37  |
| Age, years                               |   |                 |      |                 |      |                 |      | 0.60  |
| <60                                      | 1 | 1.44(0.55,3.77) | 0.45 | 1.93(0.69,5.41) | 0.21 | 1.27(0.43,3.73) | 0.66 | 0.46  |
| ≥60                                      | 1 | 0.95(0.70,1.30) | 0.75 | 0.91(0.66,1.25) | 0.57 | 0.83(0.57,1.21) | 0.32 | 0.33  |
| BMI, kg/m2                               |   |                 |      |                 |      |                 |      | 0.16  |
| Normal weight (<25)                      | 1 | 0.80(0.48,1.32) | 0.37 | 0.55(0.30,1.02) | 0.06 | 0.81(0.40,1.67) | 0.57 | 0.43  |
| Overweight (25-30)                       | 1 | 0.70(0.42,1.16) | 0.17 | 0.77(0.47,1.27) | 0.31 | 0.63(0.34,1.19) | 0.16 | 0.21  |
| Obesity (≥30)                            | 1 | 1.43(0.83,2.46) | 0.20 | 1.79(0.96,3.35) | 0.07 | 1.04(0.58,1.87) | 0.90 | 0.52  |
| Race                                     |   |                 |      |                 |      |                 |      | 0.07  |
| Non-Hispanic White                       | 1 | 0.89(0.62,1.26) | 0.51 | 1.01(0.71,1.44) | 0.95 | 0.80(0.54,1.20) | 0.28 | 0.46  |
| Non-Hispanic Black                       | 1 | 1.37(0.71,2.67) | 0.35 | 1.32(0.60,2.91) | 0.48 | 1.14(0.52,2.50) | 0.74 | 0.67  |
| Mexican American                         | 1 | 2.41(0.70,8.34) | 0.17 | 2.80(1.10,7.12) | 0.03 | 1.93(0.43,8.71) | 0.39 | 0.14  |
| Others                                   | 1 | 1.83(0.61,5.53) | 0.28 | 0.10(0.02,0.57) | 0.01 | 1.44(0.25,8.45) | 0.68 | 0.88  |
| Education level                          |   |                 |      |                 |      |                 |      | 0.05  |
| Less than high school                    | 1 | 0.93(0.60,1.45) | 0.75 | 0.67(0.40,1.12) | 0.13 | 1.42(0.88,2.31) | 0.15 | 0.49  |
| High school or equivalent                | 1 | 0.89(0.48,1.63) | 0.70 | 1.37(0.77,2.42) | 0.28 | 0.85(0.43,1.70) | 0.65 | 0.94  |
| College or above                         | 1 | 1.13(0.71,1.80) | 0.61 | 0.93(0.61,1.44) | 0.76 | 0.65(0.39,1.09) | 0.10 | 0.05  |
| Family income-poverty ratio              |   |                 |      |                 |      |                 |      | 0.05  |
| <1.0                                     | 1 | 1.30(0.73,2.33) | 0.37 | 0.91(0.47,1.76) | 0.79 | 1.01(0.47,2.14) | 0.99 | 0.78  |
| 1.0-3.0                                  | 1 | 0.99(0.68,1.42) | 0.94 | 0.96(0.65,1.42) | 0.84 | 1.32(0.86,2.05) | 0.21 | 0.29  |
| >3.0                                     | 1 | 0.81(0.43,1.51) | 0.50 | 0.99(0.52,1.89) | 0.98 | 0.43(0.23,0.80) | 0.01 | 0.03  |
| Smoking status                           |   |                 |      |                 |      |                 |      | 0.05  |
| Never                                    | 1 | 0.87(0.58,1.29) | 0.49 | 1.25(0.75,2.07) | 0.39 | 0.97(0.60,1.55) | 0.89 | 0.65  |
| Former                                   | 1 | 1.16(0.72,1.87) | 0.53 | 0.85(0.56,1.32) | 0.48 | 0.51(0.30,0.87) | 0.01 | 0.004 |
| Current                                  | 1 | 0.82(0.41,1.65) | 0.59 | 0.47(0.21,1.08) | 0.07 | 1.65(0.69,3.94) | 0.26 | 0.55  |
| Alcohol drinking                         |   |                 |      |                 |      |                 |      | 0.19  |
| Never                                    | 1 | 0.88(0.56,1.38) | 0.58 | 0.85(0.54,1.35) | 0.50 | 0.89(0.52,1.52) | 0.67 | 0.62  |
| Low to moderate                          | 1 | 1.03(0.68,1.58) | 0.88 | 1.02(0.59,1.79) | 0.93 | 0.57(0.32,1.02) | 0.06 | 0.08  |
| Heavy                                    | 1 | 0.95(0.46,1.99) | 0.90 | 1.23(0.60,2.54) | 0.57 | 1.74(0.76,3.99) | 0.19 | 0.20  |
| Healthy eating index score               |   |                 |      |                 |      |                 |      | 0.72  |
| Quarter 1                                | 1 | 1.38(0.72,2.63) | 0.33 | 1.53(0.81,2.92) | 0.19 | 1.23(0.63,2.41) | 0.55 | 0.26  |
| Quarter 2                                | 1 | 0.60(0.31,1.17) | 0.14 | 0.97(0.58,1.62) | 0.91 | 0.95(0.49,1.87) | 0.89 | 0.85  |
| Quarter 3                                | 1 | 0.99(0.59,1.69) | 0.99 | 0.96(0.49,1.89) | 0.90 | 0.82(0.40,1.70) | 0.60 | 0.61  |
| Quarter 4                                | 1 | 1.01(0.60,1.69) | 0.98 | 0.83(0.46,1.49) | 0.53 | 0.68(0.36,1.27) | 0.22 | 0.16  |
| Total energy intake from diet, kcal      |   |                 |      |                 |      |                 |      | 0.35  |
| [0,1445.5]                               | 1 | 0.78(0.49,1.25) | 0.30 | 0.52(0.30,0.91) | 0.02 | 0.70(0.39,1.28) | 0.25 | 0.11  |
| (1445.5,1908]                            | 1 | 1.12(0.66,1.90) | 0.68 | 1.14(0.70,1.87) | 0.60 | 0.95(0.58,1.57) | 0.85 | 0.95  |
| (1908,2494.5]                            | 1 | 1.98(1.07,3.66) | 0.03 | 2.61(1.28,5.31) | 0.01 | 1.74(0.89,3.41) | 0.11 | 0.11  |
| (2494.5,15594]                           | 1 | 0.63(0.26,1.51) | 0.30 | 0.50(0.21,1.17) | 0.11 | 0.50(0.18,1.38) | 0.18 | 0.21  |
| Self reported health                     |   |                 |      |                 |      |                 |      | 0.06  |
| Very good to excellent                   | 1 | 1.45(0.91,2.30) | 0.12 | 1.28(0.69,2.38) | 0.44 | 0.96(0.54,1.69) | 0.88 | 0.84  |
| Good                                     | 1 | 0.97(0.62,1.52) | 0.90 | 0.70(0.42,1.18) | 0.18 | 0.73(0.37,1.42) | 0.35 | 0.24  |
| Poor to fair                             | 1 | 0.54(0.31,0.94) | 0.03 | 1.16(0.66,2.05) | 0.61 | 0.97(0.53,1.78) | 0.93 | 0.44  |
| Family history of cardiovascular disease |   |                 |      |                 |      |                 |      | 0.59  |
| No                                       | 1 | 0.96(0.71,1.31) | 0.81 | 0.96(0.66,1.40) | 0.82 | 0.74(0.49,1.12) | 0.16 | 0.20  |
| Yes                                      | 1 | 1.14(0.58,2.24) | 0.70 | 1.28(0.73,2.22) | 0.39 | 1.38(0.72,2.64) | 0.33 | 0.28  |

|                                        |   |                      |                       |                       |       |  |      |
|----------------------------------------|---|----------------------|-----------------------|-----------------------|-------|--|------|
| Cardiovascular disease                 |   |                      |                       |                       |       |  | 0.42 |
| No                                     | 1 | 1.05(0.73,1.51) 0.79 | 1.16(0.75,1.79) 0.51  | 0.79(0.48,1.31) 0.36  | 0.51  |  |      |
| Yes                                    | 1 | 0.97(0.62,1.52) 0.89 | 0.88(0.55,1.42) 0.61  | 1.00(0.63,1.57) 0.99  | 0.87  |  |      |
| Chronic obstructive pulmonary diseases |   |                      |                       |                       |       |  | 0.33 |
| No                                     | 1 | 0.93(0.69,1.26) 0.65 | 1.05(0.75,1.47) 0.77  | 0.87(0.60,1.25) 0.45  | 0.65  |  |      |
| Yes                                    | 1 | 1.70(0.79,3.65) 0.17 | 0.63(0.21,1.87) 0.41  | 0.88(0.29,2.72) 0.83  | 0.51  |  |      |
| History of chronic kidney disease      |   |                      |                       |                       |       |  | 0.02 |
| No                                     | 1 | 0.98(0.73,1.32) 0.89 | 1.00(0.71,1.40) 0.99  | 0.79(0.54,1.14) 0.21  | 0.27  |  |      |
| Yes                                    | 1 | 1.38(0.29,6.59) 0.68 | 1.80(0.38,8.63) 0.46  | 2.66(0.19,37.23) 0.47 | 0.47  |  |      |
| Cancer                                 |   |                      |                       |                       |       |  | 0.71 |
| No                                     | 1 | 1.05(0.75,1.46) 0.79 | 1.04(0.70,1.55) 0.84  | 0.85(0.55,1.29) 0.43  | 0.50  |  |      |
| Yes                                    | 1 | 0.88(0.42,1.85) 0.74 | 1.15(0.58,2.28) 0.69  | 0.98(0.49,1.95) 0.96  | 0.85  |  |      |
| <b>Cancer mortality</b>                |   |                      |                       |                       |       |  |      |
| Sex                                    |   |                      |                       |                       |       |  | 0.45 |
| Male                                   | 1 | 0.87(0.56,1.34) 0.52 | 0.88(0.56,1.38) 0.58  | 0.61(0.36,1.03) 0.06  | 0.09  |  |      |
| Female                                 | 1 | 0.67(0.43,1.04) 0.08 | 0.49(0.31,0.79) 0.003 | 0.53(0.31,0.91) 0.02  | 0.01  |  |      |
| Age, years                             |   |                      |                       |                       |       |  | 0.77 |
| <60                                    | 1 | 0.68(0.36,1.29) 0.24 | 0.61(0.34,1.09) 0.10  | 0.41(0.20,0.85) 0.02  | 0.01  |  |      |
| ≥60                                    | 1 | 0.87(0.58,1.28) 0.47 | 0.80(0.53,1.21) 0.29  | 0.69(0.43,1.10) 0.12  | 0.11  |  |      |
| BMI, kg/m <sup>2</sup>                 |   |                      |                       |                       |       |  | 0.59 |
| Normal weight (<25)                    | 1 | 1.09(0.62,1.92) 0.77 | 0.85(0.52,1.37) 0.50  | 0.62(0.33,1.14) 0.12  | 0.08  |  |      |
| Overweight (25-30)                     | 1 | 0.62(0.34,1.13) 0.12 | 0.68(0.38,1.21) 0.19  | 0.65(0.32,1.32) 0.23  | 0.31  |  |      |
| Obesity (≥30)                          | 1 | 0.76(0.44,1.31) 0.32 | 0.68(0.39,1.17) 0.16  | 0.43(0.24,0.78) 0.01  | 0.01  |  |      |
| Race                                   |   |                      |                       |                       |       |  | 0.33 |
| Non-Hispanic White                     | 1 | 0.80(0.55,1.18) 0.27 | 0.65(0.43,0.98) 0.04  | 0.54(0.33,0.89) 0.01  | 0.01  |  |      |
| Non-Hispanic Black                     | 1 | 0.83(0.44,1.54) 0.55 | 0.87(0.45,1.67) 0.68  | 0.88(0.38,2.07) 0.77  | 0.76  |  |      |
| Mexican American                       | 1 | 0.70(0.25,1.95) 0.50 | 0.89(0.25,3.20) 0.86  | 0.22(0.05,1.01) 0.05  | 0.12  |  |      |
| Others                                 | 1 | 0.38(0.13,1.13) 0.08 | 1.70(0.59,4.89) 0.32  | 0.96(0.27,3.35) 0.94  | 0.55  |  |      |
| Education level                        |   |                      |                       |                       |       |  | 0.02 |
| Less than high school                  | 1 | 0.54(0.28,1.04) 0.07 | 0.79(0.48,1.30) 0.35  | 0.65(0.38,1.11) 0.12  | 0.18  |  |      |
| High school or equivalent              | 1 | 0.85(0.42,1.73) 0.66 | 0.40(0.21,0.76) 0.01  | 1.03(0.54,1.96) 0.93  | 0.65  |  |      |
| College or above                       | 1 | 0.85(0.50,1.43) 0.54 | 0.78(0.44,1.39) 0.41  | 0.37(0.19,0.71) 0.003 | 0.002 |  |      |
| Family income-poverty ratio            |   |                      |                       |                       |       |  | 0.79 |
| <1.0                                   | 1 | 0.91(0.45,1.84) 0.80 | 0.60(0.27,1.34) 0.22  | 0.73(0.30,1.76) 0.48  | 0.33  |  |      |
| 1.0-3.0                                | 1 | 1.00(0.64,1.55) 0.99 | 0.86(0.52,1.41) 0.54  | 0.69(0.39,1.23) 0.21  | 0.18  |  |      |
| >3.0                                   | 1 | 0.59(0.32,1.09) 0.09 | 0.62(0.36,1.08) 0.09  | 0.47(0.25,0.90) 0.02  | 0.03  |  |      |
| Smoking status                         |   |                      |                       |                       |       |  | 0.66 |
| Never                                  | 1 | 0.81(0.47,1.42) 0.46 | 0.57(0.31,1.05) 0.07  | 0.50(0.25,1.02) 0.06  | 0.02  |  |      |
| Former                                 | 1 | 1.00(0.56,1.79) 1.00 | 0.94(0.53,1.69) 0.84  | 0.63(0.34,1.18) 0.15  | 0.13  |  |      |
| Current                                | 1 | 0.49(0.26,0.91) 0.02 | 0.57(0.30,1.09) 0.09  | 0.57(0.26,1.29) 0.18  | 0.17  |  |      |
| Alcohol drinking                       |   |                      |                       |                       |       |  | 0.17 |
| Never                                  | 1 | 1.17(0.71,1.92) 0.53 | 0.63(0.35,1.14) 0.13  | 0.79(0.41,1.50) 0.47  | 0.17  |  |      |
| Low to moderate                        | 1 | 0.70(0.43,1.13) 0.14 | 0.80(0.48,1.33) 0.38  | 0.47(0.25,0.88) 0.02  | 0.03  |  |      |
| Heavy                                  | 1 | 0.44(0.19,0.99) 0.05 | 0.65(0.34,1.23) 0.19  | 0.60(0.27,1.33) 0.21  | 0.29  |  |      |
| Healthy eating index score             |   |                      |                       |                       |       |  | 0.33 |
| Quarter 1                              | 1 | 0.88(0.46,1.67) 0.69 | 0.43(0.20,0.96) 0.04  | 0.67(0.28,1.59) 0.36  | 0.10  |  |      |
| Quarter 2                              | 1 | 0.53(0.27,1.04) 0.07 | 0.35(0.17,0.70) 0.003 | 0.47(0.23,0.96) 0.04  | 0.01  |  |      |
| Quarter 3                              | 1 | 0.78(0.37,1.61) 0.49 | 1.03(0.50,2.12) 0.93  | 0.69(0.32,1.47) 0.34  | 0.58  |  |      |
| Quarter 4                              | 1 | 1.00(0.50,2.02) 0.99 | 1.09(0.53,2.27) 0.81  | 0.65(0.32,1.32) 0.23  | 0.17  |  |      |
| Total energy intake from diet, kcal    |   |                      |                       |                       |       |  | 0.86 |
| [0,1445.5]                             | 1 | 0.68(0.37,1.24) 0.21 | 0.86(0.46,1.61) 0.64  | 0.57(0.28,1.15) 0.12  | 0.16  |  |      |
| (1445.5,1908]                          | 1 | 1.02(0.52,1.97) 0.96 | 0.75(0.36,1.55) 0.43  | 0.50(0.24,1.06) 0.07  | 0.07  |  |      |
| (1908,2494.5]                          | 1 | 0.72(0.33,1.58) 0.41 | 0.57(0.28,1.15) 0.11  | 0.52(0.22,1.24) 0.14  | 0.13  |  |      |
| (2494.5,15594]                         | 1 | 0.81(0.38,1.73) 0.59 | 0.96(0.47,1.94) 0.91  | 0.79(0.34,1.84) 0.59  | 0.73  |  |      |
| Self reported health                   |   |                      |                       |                       |       |  | 0.43 |
| Very good to excellent                 | 1 | 0.54(0.28,1.04) 0.07 | 0.77(0.42,1.40) 0.39  | 0.67(0.35,1.30) 0.24  | 0.33  |  |      |
| Good                                   | 1 | 0.78(0.44,1.38) 0.39 | 0.62(0.35,1.07) 0.08  | 0.62(0.33,1.18) 0.14  | 0.09  |  |      |

|                                          |   |                      |                      |                      |       |      |
|------------------------------------------|---|----------------------|----------------------|----------------------|-------|------|
| Poor to fair                             | 1 | 0.95(0.55,1.66) 0.86 | 0.79(0.45,1.40) 0.43 | 0.53(0.30,0.95) 0.03 | 0.02  |      |
| Family history of cardiovascular disease |   |                      |                      |                      |       | 0.49 |
| No                                       | 1 | 0.86(0.59,1.25) 0.42 | 0.85(0.58,1.25) 0.41 | 0.63(0.39,1.01) 0.06 | 0.06  |      |
| Yes                                      | 1 | 0.64(0.35,1.18) 0.16 | 0.43(0.22,0.84) 0.01 | 0.49(0.25,0.93) 0.03 | 0.02  |      |
| Cardiovascular disease                   |   |                      |                      |                      |       | 0.36 |
| No                                       | 1 | 0.70(0.49,0.99) 0.04 | 0.66(0.45,0.98) 0.04 | 0.57(0.37,0.88) 0.01 | 0.01  |      |
| Yes                                      | 1 | 1.15(0.59,2.24) 0.67 | 0.99(0.52,1.87) 0.97 | 0.59(0.28,1.26) 0.18 | 0.13  |      |
| Chronic obstructive pulmonary diseases   |   |                      |                      |                      |       | 0.7  |
| No                                       | 1 | 0.79(0.55,1.13) 0.20 | 0.70(0.49,1.01) 0.06 | 0.61(0.40,0.91) 0.02 | 0.01  |      |
| Yes                                      | 1 | 0.44(0.14,1.40) 0.17 | 0.82(0.26,2.60) 0.74 | 0.20(0.03,1.40) 0.11 | 0.16  |      |
| History of chronic kidney disease        |   |                      |                      |                      |       | 0.98 |
| No                                       | 1 | 0.79(0.56,1.11) 0.17 | 0.71(0.50,1.01) 0.06 | 0.57(0.38,0.87) 0.01 | 0.01  |      |
| Yes                                      | 1 | 0.57(0.09,3.58) 0.55 | 0.66(0.13,3.40) 0.62 | 0.31(0.04,2.21) 0.24 | 0.16  |      |
| Cancer                                   |   |                      |                      |                      |       | 0.66 |
| No                                       | 1 | 0.86(0.59,1.26) 0.44 | 0.70(0.47,1.04) 0.08 | 0.58(0.37,0.92) 0.02 | 0.01  |      |
| Yes                                      | 1 | 0.60(0.32,1.12) 0.11 | 0.67(0.36,1.22) 0.19 | 0.54(0.27,1.08) 0.08 | 0.12  |      |
| <b>Other mortality</b>                   |   |                      |                      |                      |       |      |
| Sex                                      |   |                      |                      |                      |       | 0.87 |
| Male                                     | 1 | 1.17(0.80,1.71) 0.42 | 0.93(0.62,1.37) 0.70 | 0.86(0.55,1.34) 0.50 | 0.32  |      |
| Female                                   | 1 | 1.03(0.77,1.37) 0.84 | 0.79(0.52,1.19) 0.26 | 0.83(0.57,1.21) 0.34 | 0.21  |      |
| Age, years                               |   |                      |                      |                      |       | 0.12 |
| <60                                      | 1 | 1.36(0.78,2.37) 0.27 | 0.61(0.29,1.29) 0.20 | 1.13(0.54,2.36) 0.75 | 0.7   |      |
| ≥60                                      | 1 | 1.02(0.80,1.28) 0.90 | 0.92(0.69,1.23) 0.58 | 0.76(0.59,0.97) 0.03 | 0.02  |      |
| BMI, kg/m <sup>2</sup>                   |   |                      |                      |                      |       | 0.66 |
| Normal weight (<25)                      | 1 | 1.02(0.66,1.57) 0.92 | 1.01(0.63,1.60) 0.98 | 0.80(0.49,1.31) 0.37 | 0.42  |      |
| Overweight (25-30)                       | 1 | 1.31(0.91,1.90) 0.15 | 0.87(0.56,1.33) 0.51 | 0.94(0.56,1.56) 0.80 | 0.45  |      |
| Obesity (≥30)                            | 1 | 0.99(0.63,1.57) 0.97 | 0.68(0.36,1.25) 0.21 | 0.78(0.47,1.32) 0.36 | 0.21  |      |
| Race                                     |   |                      |                      |                      |       | 0.43 |
| Non-Hispanic White                       | 1 | 1.05(0.78,1.43) 0.74 | 0.83(0.57,1.20) 0.32 | 0.79(0.56,1.12) 0.19 | 0.11  |      |
| Non-Hispanic Black                       | 1 | 1.24(0.70,2.19) 0.46 | 0.63(0.34,1.17) 0.14 | 1.11(0.64,1.92) 0.70 | 0.76  |      |
| Mexican American                         | 1 | 2.55(1.01,6.41) 0.05 | 1.35(0.61,3.01) 0.46 | 1.04(0.32,3.40) 0.95 | 0.92  |      |
| Others                                   | 1 | 1.92(0.93,3.96) 0.08 | 1.60(0.82,3.13) 0.17 | 0.75(0.25,2.23) 0.60 | 0.40  |      |
| Education level                          |   |                      |                      |                      |       | 0.28 |
| Less than high school                    | 1 | 0.90(0.60,1.35) 0.62 | 0.77(0.49,1.21) 0.25 | 1.16(0.66,2.05) 0.61 | 0.89  |      |
| High school or equivalent                | 1 | 1.17(0.77,1.79) 0.46 | 0.65(0.35,1.22) 0.18 | 0.56(0.31,0.99) 0.05 | 0.02  |      |
| College or above                         | 1 | 1.36(0.87,2.15) 0.18 | 1.06(0.65,1.73) 0.81 | 0.97(0.58,1.62) 0.90 | 0.56  |      |
| Family income-poverty ratio              |   |                      |                      |                      |       | 0.55 |
| <1.0                                     | 1 | 0.94(0.57,1.53) 0.79 | 0.44(0.23,0.85) 0.01 | 0.69(0.36,1.35) 0.28 | 0.11  |      |
| 1.0-3.0                                  | 1 | 1.31(0.96,1.79) 0.09 | 1.08(0.74,1.59) 0.68 | 0.94(0.67,1.32) 0.72 | 0.58  |      |
| >3.0                                     | 1 | 1.06(0.63,1.78) 0.84 | 0.80(0.46,1.38) 0.42 | 0.83(0.47,1.49) 0.54 | 0.40  |      |
| <b>Smoking status</b>                    |   |                      |                      |                      |       | 0.48 |
| Never                                    | 1 | 1.12(0.73,1.72) 0.60 | 1.01(0.63,1.61) 0.98 | 0.76(0.44,1.29) 0.31 | 0.28  |      |
| Former                                   | 1 | 1.09(0.74,1.60) 0.68 | 0.68(0.46,1.01) 0.06 | 0.87(0.57,1.31) 0.49 | 0.19  |      |
| Current                                  | 1 | 1.10(0.65,1.84) 0.73 | 0.78(0.41,1.50) 0.45 | 0.91(0.42,1.96) 0.81 | 0.59  |      |
| Alcohol drinking                         |   |                      |                      |                      |       | 0.30 |
| Never                                    | 1 | 1.28(0.82,1.97) 0.27 | 1.00(0.63,1.59) 0.98 | 1.12(0.69,1.83) 0.64 | 0.90  |      |
| Low to moderate                          | 1 | 0.96(0.63,1.45) 0.84 | 0.82(0.52,1.29) 0.39 | 0.85(0.52,1.37) 0.49 | 0.41  |      |
| Heavy                                    | 1 | 1.14(0.64,2.05) 0.65 | 0.62(0.37,1.06) 0.08 | 0.42(0.20,0.90) 0.02 | 0.004 |      |
| Healthy eating index score               |   |                      |                      |                      |       | 0.22 |
| Quarter 1                                | 1 | 1.12(0.69,1.82) 0.66 | 0.71(0.40,1.26) 0.24 | 0.90(0.37,2.17) 0.81 | 0.49  |      |
| Quarter 2                                | 1 | 0.84(0.52,1.36) 0.48 | 0.63(0.38,1.05) 0.08 | 0.91(0.51,1.62) 0.75 | 0.48  |      |
| Quarter 3                                | 1 | 1.37(0.89,2.12) 0.15 | 1.04(0.65,1.66) 0.88 | 1.49(0.78,2.84) 0.23 | 0.45  |      |
| Quarter 4                                | 1 | 1.36(0.79,2.35) 0.26 | 1.04(0.58,1.87) 0.89 | 0.62(0.36,1.08) 0.09 | 0.01  |      |
| Total energy intake from diet, kcal      |   |                      |                      |                      |       | 0.89 |
| [0,1445.5]                               | 1 | 1.12(0.82,1.53) 0.47 | 0.75(0.50,1.13) 0.17 | 0.86(0.53,1.41) 0.56 | 0.34  |      |
| (1445.5,1908]                            | 1 | 0.88(0.55,1.41) 0.60 | 0.78(0.48,1.28) 0.32 | 0.99(0.55,1.77) 0.97 | 0.81  |      |
| (1908,2494.5]                            | 1 | 1.39(0.83,2.33) 0.21 | 0.93(0.52,1.65) 0.80 | 0.76(0.40,1.42) 0.38 | 0.17  |      |

|                                          |   |                      |                      |                      |      |
|------------------------------------------|---|----------------------|----------------------|----------------------|------|
| (2494.5,15594]                           | 1 | 1.30(0.54,3.15) 0.56 | 1.05(0.39,2.85) 0.93 | 0.87(0.33,2.29) 0.78 | 0.43 |
| Self reported health                     |   |                      |                      |                      | 0.23 |
| Very good to excellent                   | 1 | 0.97(0.64,1.47) 0.90 | 0.66(0.41,1.05) 0.08 | 1.01(0.65,1.58) 0.96 | 0.66 |
| Good                                     | 1 | 1.40(0.94,2.09) 0.10 | 1.00(0.62,1.60) 0.99 | 0.94(0.54,1.62) 0.81 | 0.53 |
| Poor to fair                             | 1 | 1.01(0.62,1.62) 0.98 | 0.87(0.51,1.48) 0.60 | 0.63(0.35,1.13) 0.12 | 0.09 |
| Family history of cardiovascular disease |   |                      |                      |                      | 0.59 |
| No                                       | 1 | 1.11(0.82,1.51) 0.49 | 0.93(0.65,1.33) 0.69 | 0.91(0.64,1.31) 0.61 | 0.42 |
| Yes                                      | 1 | 1.24(0.77,2.01) 0.38 | 0.68(0.42,1.11) 0.12 | 0.71(0.44,1.15) 0.16 | 0.04 |
| Cardiovascular disease                   |   |                      |                      |                      | 0.71 |
| No                                       | 1 | 1.14(0.84,1.53) 0.41 | 0.89(0.62,1.29) 0.55 | 0.92(0.64,1.31) 0.63 | 0.40 |
| Yes                                      | 1 | 1.24(0.80,1.94) 0.34 | 0.88(0.55,1.41) 0.59 | 0.79(0.46,1.36) 0.40 | 0.24 |
| Chronic obstructive pulmonary diseases   |   |                      |                      |                      | 0.86 |
| No                                       | 1 | 1.16(0.87,1.56) 0.31 | 0.87(0.62,1.22) 0.41 | 0.87(0.63,1.20) 0.40 | 0.17 |
| Yes                                      | 1 | 0.88(0.48,1.58) 0.66 | 0.73(0.40,1.34) 0.31 | 0.76(0.40,1.43) 0.40 | 0.35 |
| History of chronic kidney disease        |   |                      |                      |                      | 0.83 |
| No                                       | 1 | 1.14(0.87,1.49) 0.34 | 0.87(0.63,1.21) 0.41 | 0.85(0.63,1.14) 0.28 | 0.13 |
| Yes                                      | 1 | 0.94(0.23,3.85) 0.93 | 0.71(0.13,3.90) 0.70 | 1.04(0.18,6.06) 0.96 | 0.98 |
| Cancer                                   |   |                      |                      |                      | 0.76 |
| No                                       | 1 | 1.18(0.88,1.60) 0.27 | 0.83(0.57,1.21) 0.32 | 0.87(0.61,1.24) 0.44 | 0.19 |
| Yes                                      | 1 | 1.03(0.58,1.83) 0.92 | 0.90(0.52,1.55) 0.71 | 0.80(0.41,1.57) 0.52 | 0.43 |

Adjusted for sex, age, race, BMI, educational level, smoking status, drinking status, family income poverty ratio, healthy eating index-2015, total energy intake from the diet, self-reported health status, family history of cardiovascular diseases, self-reported cardiovascular disease, self-reported chronic obstructive pulmonary disease, self-reported chronic kidney disease, and self-reported cancer.

**Supplementary Table 3** Sensitivity analysis of hazard ratios for vitamin levels with all-cause and CVD mortality in prediabetes after excluding participants who experienced an outcome event within the first three years of follow-up

|                                       | Quartiles of vitamin levels |                      |                      |                        |  | <i>P</i> <sub>trend</sub> |
|---------------------------------------|-----------------------------|----------------------|----------------------|------------------------|--|---------------------------|
|                                       | Q1                          | Q2                   | Q3                   | Q4                     |  |                           |
| <b>Vitamin A</b>                      |                             |                      |                      |                        |  |                           |
| <b>All-cause mortality</b>            |                             |                      |                      |                        |  |                           |
| Crude model h(95% CI) <i>P</i> -value | 1                           | 1.02(0.84,1.25) 0.81 | 1.16(0.96,1.40) 0.12 | 1.01(0.83,1.23) 0.91   |  | 0.65                      |
| Model 1 h(95% CI) <i>P</i> -value     | 1                           | 0.85(0.70,1.03) 0.11 | 0.82(0.68,0.98) 0.03 | 0.75(0.61,0.92) 0.01   |  | 0.01                      |
| Model 2 h(95% CI) <i>P</i> -value     | 1                           | 0.91(0.75,1.10) 0.33 | 0.91(0.76,1.09) 0.30 | 0.84(0.67,1.04) 0.11   |  | 0.16                      |
| Model 3 h(95% CI) <i>P</i> -value     | 1                           | 0.90(0.73,1.09) 0.28 | 0.92(0.77,1.10) 0.35 | 0.83(0.66,1.04) 0.11   |  | 0.16                      |
| <b>CVD mortality</b>                  |                             |                      |                      |                        |  |                           |
| Crude model h(95% CI) <i>P</i> -value | 1                           | 1.24(0.89,1.72) 0.20 | 1.42(1.03,1.96) 0.03 | 1.36(0.98,1.89) 0.07   |  | 0.08                      |
| Model 1 h(95% CI) <i>P</i> -value     | 1                           | 1.00(0.71,1.41) 0.99 | 0.94(0.68,1.29) 0.69 | 0.96(0.68,1.35) 0.81   |  | 0.77                      |
| Model 2 h(95% CI) <i>P</i> -value     | 1                           | 1.05(0.73,1.52) 0.79 | 1.07(0.77,1.50) 0.68 | 1.13(0.78,1.64) 0.51   |  | 0.53                      |
| Model 3 h(95% CI) <i>P</i> -value     | 1                           | 1.04(0.71,1.51) 0.85 | 1.10(0.77,1.56) 0.60 | 1.13(0.76,1.67) 0.55   |  | 0.53                      |
| <b>Cancer mortality</b>               |                             |                      |                      |                        |  |                           |
| Crude model h(95% CI) <i>P</i> -value | 1                           | 0.87(0.61,1.24) 0.44 | 1.00(0.72,1.40) 0.99 | 0.86(0.57,1.29) 0.46   |  | 0.62                      |
| Model 1 h(95% CI) <i>P</i> -value     | 1                           | 0.74(0.52,1.04) 0.09 | 0.73(0.53,1.01) 0.06 | 0.65(0.44,0.96) 0.03   |  | 0.04                      |
| Model 2 h(95% CI) <i>P</i> -value     | 1                           | 0.77(0.54,1.11) 0.16 | 0.77(0.55,1.07) 0.12 | 0.67(0.44,1.02) 0.06   |  | 0.08                      |
| Model 3 h(95% CI) <i>P</i> -value     | 1                           | 0.79(0.55,1.13) 0.20 | 0.78(0.56,1.09) 0.15 | 0.67(0.44,1.02) 0.06   |  | 0.06                      |
| <b>Other mortality</b>                |                             |                      |                      |                        |  |                           |
| Crude model h(95% CI) <i>P</i> -value | 1                           | 1.01(0.76,1.35) 0.95 | 1.13(0.86,1.48) 0.39 | 0.92(0.70,1.23) 0.59   |  | 0.76                      |
| Model 1 h(95% CI) <i>P</i> -value     | 1                           | 0.85(0.64,1.14) 0.28 | 0.82(0.61,1.10) 0.18 | 0.70(0.52,0.95) 0.02   |  | 0.03                      |
| Model 2 h(95% CI) <i>P</i> -value     | 1                           | 0.93(0.70,1.24) 0.61 | 0.91(0.68,1.23) 0.55 | 0.79(0.57,1.10) 0.16   |  | 0.18                      |
| Model 3 h(95% CI) <i>P</i> -value     | 1                           | 0.91(0.67,1.23) 0.53 | 0.91(0.69,1.22) 0.55 | 0.78(0.55,1.09) 0.15   |  | 0.17                      |
| <b>Vitamin B1</b>                     |                             |                      |                      |                        |  |                           |
| <b>All-cause mortality</b>            |                             |                      |                      |                        |  |                           |
| Crude model h(95% CI) <i>P</i> -value | 1                           | 0.91(0.77,1.08) 0.29 | 0.92(0.76,1.10) 0.34 | 0.71(0.58,0.86) <0.001 |  | 0.001                     |
| Model 1 h(95% CI) <i>P</i> -value     | 1                           | 0.89(0.77,1.04) 0.15 | 0.87(0.72,1.04) 0.13 | 0.78(0.63,0.97) 0.02   |  | 0.03                      |
| Model 2 h(95% CI) <i>P</i> -value     | 1                           | 0.93(0.79,1.09) 0.37 | 0.96(0.79,1.17) 0.71 | 0.86(0.69,1.09) 0.21   |  | 0.31                      |
| Model 3 h(95% CI) <i>P</i> -value     | 1                           | 0.93(0.78,1.11) 0.42 | 0.99(0.81,1.22) 0.96 | 0.89(0.70,1.15) 0.38   |  | 0.53                      |
| <b>CVD mortality</b>                  |                             |                      |                      |                        |  |                           |
| Crude model h(95% CI) <i>P</i> -value | 1                           | 1.06(0.76,1.48) 0.74 | 1.07(0.76,1.49) 0.70 | 0.81(0.54,1.21) 0.30   |  | 0.32                      |
| Model 1 h(95% CI) <i>P</i> -value     | 1                           | 1.04(0.76,1.43) 0.81 | 0.99(0.71,1.38) 0.94 | 0.88(0.59,1.33) 0.55   |  | 0.51                      |
| Model 2 h(95% CI) <i>P</i> -value     | 1                           | 1.12(0.81,1.55) 0.49 | 1.13(0.81,1.58) 0.48 | 1.05(0.68,1.62) 0.82   |  | 0.82                      |
| Model 3 h(95% CI) <i>P</i> -value     | 1                           | 1.15(0.82,1.62) 0.42 | 1.20(0.85,1.69) 0.31 | 1.17(0.75,1.81) 0.49   |  | 0.47                      |
| <b>Cancer mortality</b>               |                             |                      |                      |                        |  |                           |
| Crude model h(95% CI) <i>P</i> -value | 1                           | 0.67(0.49,0.92) 0.01 | 0.72(0.50,1.04) 0.08 | 0.75(0.50,1.11) 0.15   |  | 0.21                      |

|                                       |   |                       |                        |                         |         |
|---------------------------------------|---|-----------------------|------------------------|-------------------------|---------|
| Model 1 h(95% CI) <i>P</i> -value     | 1 | 0.63(0.46,0.87) 0.005 | 0.65(0.45,0.93) 0.02   | 0.76(0.51,1.13) 0.18    | 0.22    |
| Model 2 h(95% CI) <i>P</i> -value     | 1 | 0.62(0.45,0.86) 0.004 | 0.66(0.46,0.96) 0.03   | 0.75(0.50,1.13) 0.17    | 0.26    |
| Model 3 h(95% CI) <i>P</i> -value     | 1 | 0.61(0.44,0.85) 0.003 | 0.68(0.47,0.98) 0.04   | 0.74(0.49,1.11) 0.15    | 0.26    |
| <b>Other mortality</b>                |   |                       |                        |                         |         |
| Crude model h(95% CI) <i>P</i> -value | 1 | 1.00(0.79,1.26) 0.98  | 0.96(0.74,1.24) 0.75   | 0.62(0.47,0.81) <0.001  | <0.001  |
| Model 1 h(95% CI) <i>P</i> -value     | 1 | 1.00(0.79,1.26) 0.98  | 0.96(0.75,1.24) 0.76   | 0.73(0.54,0.99) 0.04    | 0.05    |
| Model 2 h(95% CI) <i>P</i> -value     | 1 | 1.05(0.82,1.35) 0.69  | 1.10(0.82,1.47) 0.52   | 0.81(0.57,1.16) 0.26    | 0.37    |
| Model 3 h(95% CI) <i>P</i> -value     | 1 | 1.05(0.81,1.36) 0.73  | 1.14(0.84,1.54) 0.41   | 0.84(0.57,1.22) 0.35    | 0.5     |
| <b>Vitamin B2</b>                     |   |                       |                        |                         |         |
| <b>All-cause mortality</b>            |   |                       |                        |                         |         |
| Crude model h(95% CI) <i>P</i> -value | 1 | 1.04(0.86,1.26) 0.66  | 0.95(0.80,1.12) 0.54   | 0.89(0.73,1.10) 0.28    | 0.16    |
| Model 1 h(95% CI) <i>P</i> -value     | 1 | 0.86(0.72,1.03) 0.10  | 0.76(0.64,0.91) 0.002  | 0.83(0.66,1.03) 0.09    | 0.07    |
| Model 2 h(95% CI) <i>P</i> -value     | 1 | 0.88(0.72,1.07) 0.18  | 0.78(0.64,0.93) 0.01   | 0.85(0.66,1.10) 0.21    | 0.19    |
| Model 3 h(95% CI) <i>P</i> -value     | 1 | 0.90(0.74,1.10) 0.30  | 0.78(0.65,0.94) 0.01   | 0.88(0.68,1.14) 0.34    | 0.27    |
| <b>CVD mortality</b>                  |   |                       |                        |                         |         |
| Crude model h(95% CI) <i>P</i> -value | 1 | 1.39(1.04,1.84) 0.02  | 1.22(0.90,1.65) 0.21   | 1.18(0.82,1.72) 0.37    | 0.68    |
| Model 1 h(95% CI) <i>P</i> -value     | 1 | 1.12(0.85,1.49) 0.41  | 0.96(0.71,1.30) 0.80   | 1.10(0.76,1.61) 0.61    | 0.86    |
| Model 2 h(95% CI) <i>P</i> -value     | 1 | 1.20(0.91,1.60) 0.20  | 1.08(0.76,1.51) 0.68   | 1.31(0.85,2.03) 0.22    | 0.36    |
| Model 3 h(95% CI) <i>P</i> -value     | 1 | 1.25(0.93,1.68) 0.14  | 1.10(0.78,1.54) 0.59   | 1.40(0.89,2.21) 0.15    | 0.27    |
| <b>Cancer mortality</b>               |   |                       |                        |                         |         |
| Crude model h(95% CI) <i>P</i> -value | 1 | 0.83(0.57,1.21) 0.34  | 0.69(0.47,1.01) 0.06   | 0.88(0.60,1.30) 0.52    | 0.48    |
| Model 1 h(95% CI) <i>P</i> -value     | 1 | 0.68(0.46,0.99) 0.04  | 0.53(0.36,0.78) 0.001  | 0.75(0.51,1.09) 0.14    | 0.17    |
| Model 2 h(95% CI) <i>P</i> -value     | 1 | 0.65(0.43,0.98) 0.04  | 0.50(0.35,0.71) <0.001 | 0.67(0.45,1.02) 0.06    | 0.08    |
| Model 3 h(95% CI) <i>P</i> -value     | 1 | 0.66(0.44,0.99) 0.05  | 0.50(0.35,0.71) <0.001 | 0.67(0.45,1.01) 0.06    | 0.08    |
| <b>Other mortality</b>                |   |                       |                        |                         |         |
| Crude model h(95% CI) <i>P</i> -value | 1 | 1.01(0.78,1.31) 0.96  | 0.99(0.78,1.25) 0.92   | 0.75(0.54,1.04) 0.08    | 0.07    |
| Model 1 h(95% CI) <i>P</i> -value     | 1 | 0.85(0.65,1.09) 0.20  | 0.82(0.63,1.06) 0.13   | 0.73(0.52,1.03) 0.07    | 0.09    |
| Model 2 h(95% CI) <i>P</i> -value     | 1 | 0.86(0.66,1.13) 0.27  | 0.83(0.62,1.11) 0.20   | 0.74(0.48,1.14) 0.17    | 0.2     |
| Model 3 h(95% CI) <i>P</i> -value     | 1 | 0.89(0.67,1.16) 0.38  | 0.83(0.62,1.11) 0.20   | 0.76(0.49,1.18) 0.23    | 0.23    |
| <b>Niacin</b>                         |   |                       |                        |                         |         |
| <b>All-cause mortality</b>            |   |                       |                        |                         |         |
| Crude model h(95% CI) <i>P</i> -value | 1 | 0.86(0.73,1.00) 0.05  | 0.72(0.60,0.87) <0.001 | 0.57(0.47,0.70) <0.0001 | <0.0001 |
| Model 1 h(95% CI) <i>P</i> -value     | 1 | 0.90(0.78,1.04) 0.15  | 0.79(0.66,0.94) 0.01   | 0.78(0.64,0.95) 0.01    | 0.005   |
| Model 2 h(95% CI) <i>P</i> -value     | 1 | 0.92(0.79,1.07) 0.29  | 0.85(0.69,1.03) 0.10   | 0.82(0.66,1.01) 0.07    | 0.05    |
| Model 3 h(95% CI) <i>P</i> -value     | 1 | 0.93(0.79,1.11) 0.43  | 0.87(0.72,1.06) 0.17   | 0.84(0.67,1.04) 0.11    | 0.08    |
| <b>CVD mortality</b>                  |   |                       |                        |                         |         |
| Crude model h(95% CI) <i>P</i> -value | 1 | 0.95(0.69,1.32) 0.78  | 0.79(0.57,1.08) 0.14   | 0.63(0.41,0.98) 0.04    | 0.02    |
| Model 1 h(95% CI) <i>P</i> -value     | 1 | 1.00(0.73,1.38) 0.99  | 0.85(0.63,1.17) 0.32   | 0.90(0.60,1.35) 0.61    | 0.44    |



|                                       |   |                      |                      |                         |         |
|---------------------------------------|---|----------------------|----------------------|-------------------------|---------|
| Model 2 h(95% CI) <i>P</i> -value     | 1 | 1.03(0.75,1.41) 0.85 | 0.96(0.69,1.33) 0.79 | 1.04(0.68,1.60) 0.86    | 0.97    |
| Model 3 h(95% CI) <i>P</i> -value     | 1 | 1.05(0.76,1.47) 0.76 | 0.98(0.71,1.36) 0.91 | 1.09(0.71,1.67) 0.68    | 0.8     |
| <b>Cancer mortality</b>               |   |                      |                      |                         |         |
| Crude model h(95% CI) <i>P</i> -value | 1 | 0.66(0.47,0.91) 0.01 | 0.73(0.50,1.07) 0.11 | 0.62(0.42,0.91) 0.01    | 0.03    |
| Model 1 h(95% CI) <i>P</i> -value     | 1 | 0.66(0.48,0.91) 0.01 | 0.73(0.52,1.04) 0.09 | 0.73(0.50,1.06) 0.10    | 0.13    |
| Model 2 h(95% CI) <i>P</i> -value     | 1 | 0.64(0.46,0.88) 0.01 | 0.74(0.51,1.07) 0.11 | 0.69(0.47,1.00) 0.05    | 0.09    |
| Model 3 h(95% CI) <i>P</i> -value     | 1 | 0.64(0.46,0.89) 0.01 | 0.76(0.53,1.09) 0.13 | 0.69(0.48,1.00) 0.05    | 0.1     |
| <b>Other mortality</b>                |   |                      |                      |                         |         |
| Crude model h(95% CI) <i>P</i> -value | 1 | 0.93(0.72,1.20) 0.58 | 0.68(0.51,0.90) 0.01 | 0.51(0.38,0.68) <0.0001 | <0.0001 |
| Model 1 h(95% CI) <i>P</i> -value     | 1 | 1.00(0.78,1.29) 1.00 | 0.78(0.57,1.07) 0.12 | 0.74(0.53,1.03) 0.07    | 0.03    |
| Model 2 h(95% CI) <i>P</i> -value     | 1 | 1.04(0.78,1.39) 0.77 | 0.85(0.59,1.22) 0.36 | 0.77(0.53,1.13) 0.18    | 0.13    |
| Model 3 h(95% CI) <i>P</i> -value     | 1 | 1.08(0.80,1.45) 0.61 | 0.88(0.61,1.25) 0.47 | 0.79(0.54,1.17) 0.24    | 0.17    |
| <b>Vitamin B6</b>                     |   |                      |                      |                         |         |
| <b>All-cause mortality</b>            |   |                      |                      |                         |         |
| Crude model h(95% CI) <i>P</i> -value | 1 | 0.84(0.71,0.99) 0.04 | 0.85(0.71,1.02) 0.09 | 0.72(0.60,0.87) <0.001  | <0.001  |
| Model 1 h(95% CI) <i>P</i> -value     | 1 | 0.89(0.77,1.03) 0.11 | 0.89(0.74,1.06) 0.20 | 0.83(0.68,1.00) 0.05    | 0.06    |
| Model 2 h(95% CI) <i>P</i> -value     | 1 | 0.96(0.82,1.12) 0.57 | 0.97(0.79,1.20) 0.81 | 0.93(0.74,1.16) 0.51    | 0.6     |
| Model 3 h(95% CI) <i>P</i> -value     | 1 | 1.01(0.86,1.18) 0.93 | 1.05(0.86,1.29) 0.62 | 0.96(0.77,1.20) 0.73    | 0.86    |
| <b>CVD mortality</b>                  |   |                      |                      |                         |         |
| Crude model h(95% CI) <i>P</i> -value | 1 | 0.89(0.66,1.19) 0.42 | 0.90(0.66,1.22) 0.48 | 0.85(0.60,1.20) 0.35    | 0.37    |
| Model 1 h(95% CI) <i>P</i> -value     | 1 | 0.93(0.70,1.24) 0.62 | 0.93(0.68,1.26) 0.63 | 0.97(0.69,1.37) 0.87    | 0.85    |
| Model 2 h(95% CI) <i>P</i> -value     | 1 | 1.02(0.75,1.39) 0.91 | 1.05(0.76,1.44) 0.78 | 1.19(0.81,1.76) 0.36    | 0.36    |
| Model 3 h(95% CI) <i>P</i> -value     | 1 | 1.06(0.78,1.45) 0.70 | 1.09(0.79,1.51) 0.61 | 1.25(0.85,1.84) 0.26    | 0.27    |
| <b>Cancer mortality</b>               |   |                      |                      |                         |         |
| Crude model h(95% CI) <i>P</i> -value | 1 | 0.64(0.45,0.91) 0.01 | 0.76(0.54,1.07) 0.12 | 0.67(0.47,0.95) 0.03    | 0.07    |
| Model 1 h(95% CI) <i>P</i> -value     | 1 | 0.64(0.45,0.90) 0.01 | 0.74(0.53,1.04) 0.08 | 0.68(0.48,0.98) 0.04    | 0.08    |
| Model 2 h(95% CI) <i>P</i> -value     | 1 | 0.65(0.46,0.91) 0.01 | 0.75(0.52,1.07) 0.11 | 0.66(0.45,0.96) 0.03    | 0.09    |
| Model 3 h(95% CI) <i>P</i> -value     | 1 | 0.65(0.46,0.92) 0.01 | 0.79(0.56,1.13) 0.19 | 0.66(0.45,0.96) 0.03    | 0.1     |
| <b>Other mortality</b>                |   |                      |                      |                         |         |
| Crude model h(95% CI) <i>P</i> -value | 1 | 0.96(0.74,1.25) 0.75 | 0.89(0.68,1.17) 0.40 | 0.68(0.50,0.92) 0.01    | 0.01    |
| Model 1 h(95% CI) <i>P</i> -value     | 1 | 1.05(0.83,1.34) 0.69 | 0.97(0.75,1.27) 0.84 | 0.83(0.60,1.14) 0.25    | 0.23    |
| Model 2 h(95% CI) <i>P</i> -value     | 1 | 1.16(0.89,1.51) 0.27 | 1.10(0.81,1.50) 0.53 | 0.97(0.66,1.42) 0.89    | 0.84    |
| Model 3 h(95% CI) <i>P</i> -value     | 1 | 1.29(0.99,1.68) 0.06 | 1.25(0.92,1.69) 0.15 | 1.04(0.72,1.49) 0.84    | 0.89    |
| <b>Folate</b>                         |   |                      |                      |                         |         |
| <b>All-cause mortality</b>            |   |                      |                      |                         |         |
| Crude model h(95% CI) <i>P</i> -value | 1 | 0.88(0.75,1.03) 0.12 | 0.90(0.75,1.07) 0.22 | 0.66(0.54,0.80) <0.0001 | <0.0001 |
| Model 1 h(95% CI) <i>P</i> -value     | 1 | 0.85(0.72,1.01) 0.06 | 0.92(0.78,1.09) 0.34 | 0.75(0.62,0.92) 0.005   | 0.01    |
| Model 2 h(95% CI) <i>P</i> -value     | 1 | 0.91(0.77,1.07) 0.26 | 1.02(0.85,1.22) 0.82 | 0.82(0.66,1.03) 0.09    | 0.22    |

|                                       |   |                      |                      |                        |        |
|---------------------------------------|---|----------------------|----------------------|------------------------|--------|
| Model 3 h(95% CI) <i>P</i> -value     | 1 | 0.95(0.80,1.12) 0.52 | 1.04(0.86,1.25) 0.71 | 0.86(0.68,1.08) 0.20   | 0.36   |
| <b>CVD mortality</b>                  |   |                      |                      |                        |        |
| Crude model h(95% CI) <i>P</i> -value | 1 | 0.95(0.72,1.25) 0.70 | 1.04(0.75,1.45) 0.80 | 0.70(0.50,1.00) 0.05   | 0.1    |
| Model 1 h(95% CI) <i>P</i> -value     | 1 | 0.89(0.66,1.20) 0.46 | 1.07(0.78,1.46) 0.66 | 0.80(0.56,1.13) 0.20   | 0.42   |
| Model 2 h(95% CI) <i>P</i> -value     | 1 | 0.98(0.73,1.32) 0.90 | 1.24(0.91,1.68) 0.17 | 0.95(0.67,1.36) 0.80   | 0.8    |
| Model 3 h(95% CI) <i>P</i> -value     | 1 | 1.03(0.76,1.41) 0.83 | 1.33(0.97,1.83) 0.08 | 1.04(0.73,1.49) 0.83   | 0.46   |
| <b>Cancer mortality</b>               |   |                      |                      |                        |        |
| Crude model h(95% CI) <i>P</i> -value | 1 | 0.94(0.67,1.31) 0.71 | 0.88(0.60,1.28) 0.50 | 0.72(0.47,1.11) 0.14   | 0.13   |
| Model 1 h(95% CI) <i>P</i> -value     | 1 | 0.88(0.62,1.26) 0.49 | 0.85(0.58,1.25) 0.42 | 0.77(0.50,1.18) 0.22   | 0.22   |
| Model 2 h(95% CI) <i>P</i> -value     | 1 | 0.92(0.64,1.32) 0.64 | 0.91(0.60,1.37) 0.65 | 0.78(0.49,1.24) 0.30   | 0.3    |
| Model 3 h(95% CI) <i>P</i> -value     | 1 | 0.94(0.64,1.36) 0.72 | 0.90(0.59,1.38) 0.64 | 0.77(0.48,1.24) 0.29   | 0.28   |
| <b>Other mortality</b>                |   |                      |                      |                        |        |
| Crude model h(95% CI) <i>P</i> -value | 1 | 0.81(0.63,1.04) 0.09 | 0.82(0.63,1.07) 0.15 | 0.60(0.45,0.80) <0.001 | <0.001 |
| Model 1 h(95% CI) <i>P</i> -value     | 1 | 0.81(0.64,1.02) 0.07 | 0.88(0.68,1.14) 0.32 | 0.72(0.53,0.98) 0.04   | 0.05   |
| Model 2 h(95% CI) <i>P</i> -value     | 1 | 0.86(0.67,1.11) 0.24 | 0.97(0.73,1.30) 0.85 | 0.77(0.54,1.10) 0.15   | 0.26   |
| Model 3 h(95% CI) <i>P</i> -value     | 1 | 0.90(0.70,1.15) 0.40 | 0.96(0.72,1.28) 0.78 | 0.82(0.57,1.17) 0.27   | 0.36   |
| <b>Vitamin B12</b>                    |   |                      |                      |                        |        |
| <b>All-cause mortality</b>            |   |                      |                      |                        |        |
| Crude model h(95% CI) <i>P</i> -value | 1 | 1.02(0.86,1.22) 0.82 | 1.05(0.87,1.28) 0.60 | 0.89(0.74,1.07) 0.21   | 0.24   |
| Model 1 h(95% CI) <i>P</i> -value     | 1 | 0.95(0.80,1.14) 0.59 | 1.02(0.84,1.25) 0.81 | 0.87(0.71,1.06) 0.16   | 0.27   |
| Model 2 h(95% CI) <i>P</i> -value     | 1 | 0.96(0.80,1.16) 0.70 | 1.05(0.85,1.29) 0.67 | 0.90(0.73,1.10) 0.30   | 0.46   |
| Model 3 h(95% CI) <i>P</i> -value     | 1 | 0.96(0.80,1.16) 0.68 | 1.02(0.84,1.24) 0.84 | 0.89(0.72,1.10) 0.27   | 0.38   |
| <b>CVD mortality</b>                  |   |                      |                      |                        |        |
| Crude model h(95% CI) <i>P</i> -value | 1 | 1.00(0.70,1.45) 0.98 | 1.01(0.72,1.40) 0.97 | 0.94(0.66,1.32) 0.71   | 0.72   |
| Model 1 h(95% CI) <i>P</i> -value     | 1 | 0.90(0.63,1.28) 0.55 | 0.95(0.68,1.32) 0.74 | 0.88(0.62,1.23) 0.45   | 0.56   |
| Model 2 h(95% CI) <i>P</i> -value     | 1 | 0.92(0.64,1.31) 0.63 | 0.99(0.70,1.39) 0.94 | 0.95(0.66,1.37) 0.79   | 0.94   |
| Model 3 h(95% CI) <i>P</i> -value     | 1 | 0.91(0.63,1.31) 0.60 | 0.96(0.68,1.36) 0.83 | 0.95(0.65,1.38) 0.77   | 0.9    |
| <b>Cancer mortality</b>               |   |                      |                      |                        |        |
| Crude model h(95% CI) <i>P</i> -value | 1 | 0.77(0.56,1.05) 0.10 | 0.78(0.55,1.10) 0.16 | 0.91(0.60,1.36) 0.64   | 0.73   |
| Model 1 h(95% CI) <i>P</i> -value     | 1 | 0.71(0.51,0.98) 0.04 | 0.73(0.52,1.02) 0.07 | 0.84(0.57,1.25) 0.39   | 0.54   |
| Model 2 h(95% CI) <i>P</i> -value     | 1 | 0.71(0.51,0.99) 0.04 | 0.72(0.51,1.00) 0.05 | 0.82(0.55,1.22) 0.32   | 0.46   |
| Model 3 h(95% CI) <i>P</i> -value     | 1 | 0.71(0.51,0.99) 0.04 | 0.71(0.51,0.99) 0.05 | 0.80(0.54,1.20) 0.28   | 0.42   |
| <b>Other mortality</b>                |   |                      |                      |                        |        |
| Crude model h(95% CI) <i>P</i> -value | 1 | 1.24(0.98,1.56) 0.07 | 1.31(1.00,1.74) 0.05 | 0.84(0.64,1.09) 0.19   | 0.23   |
| Model 1 h(95% CI) <i>P</i> -value     | 1 | 1.19(0.92,1.54) 0.17 | 1.34(0.99,1.80) 0.06 | 0.87(0.64,1.18) 0.36   | 0.49   |
| Model 2 h(95% CI) <i>P</i> -value     | 1 | 1.21(0.92,1.59) 0.17 | 1.37(1.01,1.87) 0.05 | 0.90(0.66,1.23) 0.50   | 0.66   |
| Model 3 h(95% CI) <i>P</i> -value     | 1 | 1.20(0.92,1.57) 0.17 | 1.32(0.98,1.76) 0.07 | 0.88(0.65,1.20) 0.43   | 0.52   |
| <b>Vitamin C</b>                      |   |                      |                      |                        |        |

| <b>All-cause mortality</b>            |   |                        |                      |                      |       |  |  |
|---------------------------------------|---|------------------------|----------------------|----------------------|-------|--|--|
| Crude model h(95% CI) <i>P</i> -value | 1 | 0.83(0.68,1.03) 0.09   | 1.05(0.85,1.30) 0.64 | 0.89(0.71,1.10) 0.28 | 0.75  |  |  |
| Model 1 h(95% CI) <i>P</i> -value     | 1 | 0.74(0.62,0.89) <0.001 | 0.81(0.66,0.99) 0.04 | 0.76(0.62,0.93) 0.01 | 0.04  |  |  |
| Model 2 h(95% CI) <i>P</i> -value     | 1 | 0.82(0.69,0.98) 0.03   | 0.92(0.75,1.13) 0.44 | 0.89(0.72,1.11) 0.31 | 0.58  |  |  |
| Model 3 h(95% CI) <i>P</i> -value     | 1 | 0.82(0.69,0.97) 0.02   | 0.92(0.75,1.12) 0.40 | 0.89(0.72,1.11) 0.31 | 0.59  |  |  |
| <b>CVD mortality</b>                  |   |                        |                      |                      |       |  |  |
| Crude model h(95% CI) <i>P</i> -value | 1 | 0.98(0.67,1.44) 0.92   | 1.27(0.89,1.80) 0.18 | 1.01(0.69,1.49) 0.95 | 0.61  |  |  |
| Model 1 h(95% CI) <i>P</i> -value     | 1 | 0.86(0.61,1.23) 0.41   | 0.93(0.67,1.31) 0.68 | 0.83(0.56,1.23) 0.36 | 0.49  |  |  |
| Model 2 h(95% CI) <i>P</i> -value     | 1 | 0.95(0.66,1.36) 0.79   | 1.08(0.74,1.56) 0.70 | 1.02(0.65,1.60) 0.94 | 0.8   |  |  |
| Model 3 h(95% CI) <i>P</i> -value     | 1 | 0.92(0.64,1.32) 0.64   | 1.05(0.72,1.53) 0.81 | 1.04(0.66,1.65) 0.86 | 0.71  |  |  |
| <b>Cancer mortality</b>               |   |                        |                      |                      |       |  |  |
| Crude model h(95% CI) <i>P</i> -value | 1 | 0.75(0.53,1.06) 0.11   | 0.99(0.68,1.43) 0.94 | 0.86(0.59,1.26) 0.44 | 0.79  |  |  |
| Model 1 h(95% CI) <i>P</i> -value     | 1 | 0.66(0.48,0.92) 0.01   | 0.77(0.55,1.08) 0.13 | 0.73(0.51,1.06) 0.10 | 0.23  |  |  |
| Model 2 h(95% CI) <i>P</i> -value     | 1 | 0.73(0.53,1.00) 0.05   | 0.85(0.60,1.21) 0.37 | 0.82(0.57,1.18) 0.29 | 0.51  |  |  |
| Model 3 h(95% CI) <i>P</i> -value     | 1 | 0.73(0.53,1.00) 0.05   | 0.85(0.60,1.20) 0.35 | 0.80(0.56,1.15) 0.23 | 0.44  |  |  |
| <b>Other mortality</b>                |   |                        |                      |                      |       |  |  |
| Crude model h(95% CI) <i>P</i> -value | 1 | 0.80(0.59,1.09) 0.16   | 0.97(0.69,1.36) 0.86 | 0.83(0.61,1.14) 0.25 | 0.49  |  |  |
| Model 1 h(95% CI) <i>P</i> -value     | 1 | 0.73(0.54,0.99) 0.04   | 0.77(0.54,1.08) 0.13 | 0.73(0.55,0.98) 0.04 | 0.08  |  |  |
| Model 2 h(95% CI) <i>P</i> -value     | 1 | 0.81(0.60,1.08) 0.15   | 0.87(0.62,1.23) 0.44 | 0.87(0.63,1.19) 0.37 | 0.52  |  |  |
| Model 3 h(95% CI) <i>P</i> -value     | 1 | 0.82(0.62,1.09) 0.17   | 0.87(0.62,1.23) 0.44 | 0.88(0.65,1.19) 0.41 | 0.54  |  |  |
| <b>Vitamin D</b>                      |   |                        |                      |                      |       |  |  |
| <b>All-cause mortality</b>            |   |                        |                      |                      |       |  |  |
| Crude model h(95% CI) <i>P</i> -value | 1 | 1.21(0.94,1.56) 0.15   | 1.49(1.12,1.99) 0.01 | 1.57(1.14,2.16) 0.01 | 0.002 |  |  |
| Model 1 h(95% CI) <i>P</i> -value     | 1 | 0.97(0.75,1.26) 0.83   | 1.08(0.84,1.38) 0.56 | 1.30(0.96,1.77) 0.09 | 0.05  |  |  |
| Model 2 h(95% CI) <i>P</i> -value     | 1 | 1.03(0.80,1.32) 0.82   | 1.22(0.95,1.55) 0.11 | 1.42(1.03,1.97) 0.03 | 0.02  |  |  |
| Model 3 h(95% CI) <i>P</i> -value     | 1 | 1.04(0.82,1.32) 0.73   | 1.18(0.91,1.51) 0.21 | 1.38(1.00,1.89) 0.05 | 0.03  |  |  |
| <b>CVD mortality</b>                  |   |                        |                      |                      |       |  |  |
| Crude model h(95% CI) <i>P</i> -value | 1 | 1.62(1.00,2.63) 0.05   | 2.07(1.14,3.76) 0.02 | 2.20(1.14,4.25) 0.02 | 0.02  |  |  |
| Model 1 h(95% CI) <i>P</i> -value     | 1 | 1.24(0.75,2.06) 0.40   | 1.41(0.75,2.63) 0.28 | 1.75(0.92,3.32) 0.09 | 0.07  |  |  |
| Model 2 h(95% CI) <i>P</i> -value     | 1 | 1.27(0.76,2.12) 0.35   | 1.53(0.82,2.86) 0.18 | 1.90(0.97,3.72) 0.06 | 0.04  |  |  |
| Model 3 h(95% CI) <i>P</i> -value     | 1 | 1.26(0.77,2.05) 0.36   | 1.49(0.79,2.81) 0.22 | 1.79(0.90,3.55) 0.10 | 0.08  |  |  |
| <b>Cancer mortality</b>               |   |                        |                      |                      |       |  |  |
| Crude model h(95% CI) <i>P</i> -value | 1 | 1.09(0.60,1.98) 0.78   | 1.10(0.58,2.09) 0.76 | 1.24(0.71,2.17) 0.45 | 0.47  |  |  |
| Model 1 h(95% CI) <i>P</i> -value     | 1 | 0.88(0.49,1.58) 0.67   | 0.82(0.45,1.49) 0.52 | 1.02(0.59,1.78) 0.94 | 0.92  |  |  |
| Model 2 h(95% CI) <i>P</i> -value     | 1 | 0.91(0.51,1.62) 0.75   | 0.88(0.48,1.63) 0.69 | 1.03(0.58,1.83) 0.92 | 0.89  |  |  |
| Model 3 h(95% CI) <i>P</i> -value     | 1 | 0.99(0.56,1.73) 0.96   | 0.90(0.48,1.67) 0.73 | 1.08(0.61,1.90) 0.80 | 0.86  |  |  |
| <b>Other mortality</b>                |   |                        |                      |                      |       |  |  |
| Crude model h(95% CI) <i>P</i> -value | 1 | 1.09(0.74,1.62) 0.65   | 1.52(1.01,2.26) 0.04 | 1.51(0.96,2.38) 0.07 | 0.03  |  |  |

|                                       |   |                      |                        |                         |         |
|---------------------------------------|---|----------------------|------------------------|-------------------------|---------|
| Model 1 h(95% CI) <i>P</i> -value     | 1 | 0.91(0.62,1.35) 0.65 | 1.12(0.76,1.63) 0.57   | 1.30(0.84,2.02)0.23     | 0.13    |
| Model 2 h(95% CI) <i>P</i> -value     | 1 | 1.01(0.68,1.51) 0.96 | 1.36(0.92,2.01) 0.12   | 1.52(0.94,2.48) 0.09    | 0.04    |
| Model 3 h(95% CI) <i>P</i> -value     | 1 | 0.99(0.66,1.48) 0.95 | 1.27(0.87,1.86) 0.22   | 1.41(0.89,2.23) 0.14    | 0.07    |
| <b>Vitamin E</b>                      |   |                      |                        |                         |         |
| <b>All-cause mortality</b>            |   |                      |                        |                         |         |
| Crude model h(95% CI) <i>P</i> -value | 1 | 0.87(0.72,1.05) 0.13 | 0.69(0.57,0.84) <0.001 | 0.60(0.49,0.75) <0.0001 | <0.0001 |
| Model 1 h(95% CI) <i>P</i> -value     | 1 | 0.89(0.73,1.08) 0.25 | 0.72(0.59,0.89) 0.003  | 0.75(0.60,0.93) 0.01    | 0.002   |
| Model 2 h(95% CI) <i>P</i> -value     | 1 | 0.91(0.74,1.12) 0.38 | 0.77(0.61,0.96) 0.02   | 0.81(0.62,1.06) 0.13    | 0.06    |
| Model 3 h(95% CI) <i>P</i> -value     | 1 | 0.95(0.78,1.16) 0.61 | 0.80(0.63,1.00) 0.05   | 0.83(0.64,1.08) 0.17    | 0.08    |
| <b>CVD mortality</b>                  |   |                      |                        |                         |         |
| Crude model h(95% CI) <i>P</i> -value | 1 | 0.88(0.66,1.16) 0.35 | 0.72(0.52,0.99) 0.04   | 0.84(0.58,1.20) 0.33    | 0.22    |
| Model 1 h(95% CI) <i>P</i> -value     | 1 | 0.91(0.69,1.20) 0.51 | 0.76(0.54,1.06) 0.11   | 1.09(0.74,1.62) 0.66    | 0.95    |
| Model 2 h(95% CI) <i>P</i> -value     | 1 | 0.99(0.74,1.32) 0.92 | 0.90(0.61,1.32) 0.58   | 1.40(0.91,2.17) 0.13    | 0.23    |
| Model 3 h(95% CI) <i>P</i> -value     | 1 | 1.05(0.80,1.38) 0.74 | 0.95(0.64,1.42) 0.80   | 1.47(0.95,2.28) 0.08    | 0.17    |
| <b>Cancer mortality</b>               |   |                      |                        |                         |         |
| Crude model h(95% CI) <i>P</i> -value | 1 | 0.98(0.69,1.40) 0.92 | 0.81(0.52,1.25) 0.33   | 0.70(0.45,1.09) 0.12    | 0.09    |
| Model 1 h(95% CI) <i>P</i> -value     | 1 | 0.98(0.69,1.39) 0.90 | 0.80(0.52,1.23) 0.30   | 0.78(0.51,1.20) 0.26    | 0.19    |
| Model 2 h(95% CI) <i>P</i> -value     | 1 | 0.99(0.69,1.41) 0.94 | 0.82(0.53,1.25) 0.35   | 0.79(0.51,1.22) 0.28    | 0.2     |
| Model 3 h(95% CI) <i>P</i> -value     | 1 | 0.99(0.70,1.41) 0.96 | 0.83(0.54,1.26) 0.38   | 0.77(0.50,1.19) 0.24    | 0.17    |
| <b>Other mortality</b>                |   |                      |                        |                         |         |
| Crude model h(95% CI) <i>P</i> -value | 1 | 0.80(0.59,1.08) 0.15 | 0.62(0.48,0.80) <0.001 | 0.42(0.31,0.56) <0.0001 | <0.0001 |
| Model 1 h(95% CI) <i>P</i> -value     | 1 | 0.84(0.61,1.14) 0.27 | 0.67(0.50,0.88) 0.005  | 0.54(0.39,0.74) <0.001  | <0.0001 |
| Model 2 h(95% CI) <i>P</i> -value     | 1 | 0.83(0.59,1.15) 0.26 | 0.66(0.48,0.90) 0.01   | 0.54(0.36,0.79) 0.002   | <0.001  |
| Model 3 h(95% CI) <i>P</i> -value     | 1 | 0.86(0.62,1.19) 0.37 | 0.68(0.50,0.93) 0.02   | 0.56(0.38,0.83) 0.004   | 0.002   |
| <b>Vitamin K</b>                      |   |                      |                        |                         |         |
| <b>All-cause mortality</b>            |   |                      |                        |                         |         |
| Crude model h(95% CI) <i>P</i> -value | 1 | 0.92(0.76,1.11) 0.38 | 0.84(0.69,1.03) 0.09   | 0.68(0.55,0.85) <0.001  | <0.001  |
| Model 1 h(95% CI) <i>P</i> -value     | 1 | 0.89(0.74,1.08) 0.25 | 0.83(0.69,1.01) 0.06   | 0.70(0.57,0.86) <0.001  | <0.001  |
| Model 2 h(95% CI) <i>P</i> -value     | 1 | 0.91(0.74,1.12) 0.39 | 0.91(0.74,1.11) 0.35   | 0.73(0.58,0.92) 0.01    | 0.01    |
| Model 3 h(95% CI) <i>P</i> -value     | 1 | 0.92(0.75,1.15) 0.47 | 0.92(0.75,1.11) 0.37   | 0.75(0.59,0.94) 0.01    | 0.01    |
| <b>CVD mortality</b>                  |   |                      |                        |                         |         |
| Crude model h(95% CI) <i>P</i> -value | 1 | 0.94(0.66,1.33) 0.73 | 1.18(0.81,1.71) 0.39   | 0.85(0.58,1.24) 0.40    | 0.73    |
| Model 1 h(95% CI) <i>P</i> -value     | 1 | 0.89(0.62,1.29) 0.55 | 1.14(0.79,1.64) 0.50   | 0.88(0.60,1.29) 0.52    | 0.88    |
| Model 2 h(95% CI) <i>P</i> -value     | 1 | 0.94(0.65,1.36) 0.73 | 1.29(0.88,1.89) 0.19   | 1.02(0.69,1.52) 0.92    | 0.51    |
| Model 3 h(95% CI) <i>P</i> -value     | 1 | 0.96(0.66,1.41) 0.84 | 1.29(0.87,1.92) 0.21   | 1.07(0.71,1.60) 0.75    | 0.43    |
| <b>Cancer mortality</b>               |   |                      |                        |                         |         |
| Crude model h(95% CI) <i>P</i> -value | 1 | 0.72(0.50,1.04) 0.08 | 0.71(0.50,1.02) 0.06   | 0.59(0.39,0.90) 0.02    | 0.01    |
| Model 1 h(95% CI) <i>P</i> -value     | 1 | 0.70(0.49,1.02) 0.06 | 0.70(0.49,0.98) 0.04   | 0.59(0.38,0.91) 0.02    | 0.01    |

|                                       |   |                      |                      |                      |       |
|---------------------------------------|---|----------------------|----------------------|----------------------|-------|
| Model 2 h(95% CI) <i>P</i> -value     | 1 | 0.69(0.47,1.02) 0.06 | 0.70(0.49,1.00) 0.05 | 0.56(0.36,0.88) 0.01 | 0.01  |
| Model 3 h(95% CI) <i>P</i> -value     | 1 | 0.68(0.45,1.00) 0.05 | 0.71(0.50,1.02) 0.06 | 0.55(0.35,0.86) 0.01 | 0.01  |
| <b>Other mortality</b>                |   |                      |                      |                      |       |
| Crude model h(95% CI) <i>P</i> -value | 1 | 1.04(0.76,1.43) 0.80 | 0.74(0.51,1.07) 0.11 | 0.65(0.48,0.89) 0.01 | 0.002 |
| Model 1 h(95% CI) <i>P</i> -value     | 1 | 1.03(0.77,1.38) 0.85 | 0.75(0.52,1.08) 0.12 | 0.68(0.51,0.90) 0.01 | 0.003 |
| Model 2 h(95% CI) <i>P</i> -value     | 1 | 1.06(0.77,1.46) 0.73 | 0.84(0.57,1.23) 0.36 | 0.70(0.51,0.97) 0.03 | 0.02  |
| Model 3 h(95% CI) <i>P</i> -value     | 1 | 1.08(0.79,1.49) 0.62 | 0.85(0.59,1.22) 0.37 | 0.72(0.52,1.00) 0.05 | 0.02  |

Data are presented as HR (95% CI) unless otherwise indicated. Crude model: without adjustment. Model 1: adjusted for sex, age, BMI, ethnicity, educational level, and family income poverty ratio. Model 2: adjusted for model 1 variables as well as smoking status, alcohol drinking status, HEI, and total energy intake from the diet. Model 3: adjusted for model 1 and model 2 variables as well as self-reported health status, family history of cardiovascular diseases, self-reported history of cardiovascular disease, self-reported chronic obstructive pulmonary disease, chronic kidney disease, and cancer.
